# Supplementary material for: Movement patterns of two reintegrated African elephant (Loxodonta africana) herds: transitioning from captivity to free-living
Source: PeerJ. 2024 Jun 6;12:e17535. doi: 10.7717/peerj.17535 (PMC11162612; doi:10.7717/peerj.17535)
Supplement: Supplemental Information 7 — Each data point represents a GPS location (longitude and latitude) of the two elephant herds on the two separate reserves. Each data point is also linked to an exact time and date stamp. The date stamps were used to categorize the data into 4 seasons (Dry, Wet, Autumn, and Spring) (Tab 1). The home range sizes (Tab 2) and total daily distances traveled by the elephants were also calculated (Tab 4 and 5). [file peerj-12-17535-s007.xlsx]

## Sheet: SPGR+KKR Movement metrics
Animal	Timestamp	lon	lat	speed	distance
KKR	2015-12-11 06:39:00	23.23892	-25.5538	NA	NA
KKR	2015-12-11 07:38:00	23.24138	-25.55418	0.257970448368038	253.670940895237
KKR	2015-12-11 08:38:00	23.24363	-25.55568	0.28384532625396	283.84532625396
KKR	2015-12-11 11:26:00	23.24982	-25.55852	0.251829717939972	705.123210231923
KKR	2015-12-11 12:24:00	23.25228	-25.56098	0.385013686457749	372.179896909158
KKR	2015-12-11 13:24:00	23.25317	-25.5616	0.114064942247114	114.064942247114
KKR	2015-12-11 15:39:00	23.27355	-25.56615	0.948115670049855	2133.26025761217
KKR	2015-12-11 16:38:00	23.2649	-25.56368	0.937330304368974	921.708132629491
KKR	2015-12-11 17:37:00	23.26642	-25.56382	0.157919503403579	155.287511680186
KKR	2015-12-11 19:50:00	23.27642	-25.56797	0.50422534772679	1117.69952079438
KKR	2015-12-11 20:48:00	23.27382	-25.55347	1.70287873260498	1646.11610818481
KKR	2015-12-11 21:49:00	23.27567	-25.54432	1.0252997104765	1042.38803898444
KKR	2015-12-11 22:49:00	23.28057	-25.54253	0.536973906208573	536.973906208573
KKR	2015-12-11 23:49:00	23.28223	-25.53993	0.33667648241298	336.67648241298
KKR	2015-12-12 00:49:00	23.28337	-25.53367	0.710947669871701	710.947669871701
KKR	2015-12-12 01:48:00	23.28007	-25.51527	2.12426804579311	2088.86357836323
KKR	2015-12-12 02:48:00	23.2732	-25.5025	1.59233160694543	1592.33160694543
KKR	2015-12-12 03:48:00	23.2706	-25.48928	1.50476847704559	1504.76847704559
KKR	2015-12-12 04:48:00	23.27148	-25.47273	1.85666002996283	1856.66002996283
KKR	2015-12-12 05:48:00	23.2644	-25.46793	0.898864668928299	898.864668928299
KKR	2015-12-12 06:48:00	23.2519	-25.4675	1.27247392938839	1272.47392938839
KKR	2015-12-12 07:48:00	23.25192	-25.46672	0.0874303173602824	87.4303173602824
KKR	2015-12-12 08:49:00	23.25068	-25.46675	0.124118190707648	126.186827219442
KKR	2015-12-12 09:49:00	23.24663	-25.46615	0.417450111371204	417.450111371204
KKR	2015-12-12 10:49:00	23.24477	-25.46593	0.190816087408739	190.816087408739
KKR	2015-12-12 11:49:00	23.24218	-25.45882	0.839199504274781	839.199504274781
KKR	2015-12-12 14:07:00	23.24047	-25.45742	0.101853955888936	234.264098544553
KKR	2015-12-12 15:06:00	23.23957	-25.4578	0.102693829005993	100.982265189226
KKR	2015-12-12 16:07:00	23.23678	-25.45955	0.339350510952962	345.006352802178
KKR	2015-12-12 17:07:00	23.2229	-25.46757	1.6738518962673	1673.8518962673
KKR	2015-12-12 18:07:00	23.20842	-25.47915	1.96318704044908	1963.18704044908
KKR	2015-12-12 19:06:00	23.20215	-25.49107	1.50543941902234	1480.34876203864
KKR	2015-12-12 20:06:00	23.20217	-25.50128	1.14426959852646	1144.26959852646
KKR	2015-12-12 21:07:00	23.20097	-25.50467	0.392509635120716	399.051462372728
KKR	2015-12-12 22:07:00	23.19693	-25.51797	1.54617624756348	1546.17624756348
KKR	2015-12-12 23:07:00	23.19235	-25.5174	0.470135628954694	470.135628954694
KKR	2015-12-13 00:06:00	23.19233	-25.51707	0.0376687074324233	37.0408956418829
KKR	2015-12-13 01:06:00	23.19225	-25.5162	0.0978447930161109	97.8447930161109
KKR	2015-12-13 02:08:00	23.19255	-25.51628	0.0307741950354034	31.8000015365835
KKR	2015-12-13 03:06:00	23.1962	-25.51358	0.495431957606486	478.917559019603
KKR	2015-12-13 04:07:00	23.2024	-25.50092	1.52721389679287	1552.66746173942
KKR	2015-12-13 05:07:00	23.2084	-25.48475	1.91221604578435	1912.21604578435
KKR	2015-12-13 06:06:00	23.21635	-25.48732	0.872988174816916	858.4383719033
KKR	2015-12-13 07:06:00	23.21897	-25.49443	0.84019404367906	840.19404367906
KKR	2015-12-13 08:06:00	23.2241	-25.50258	1.05187792520857	1051.87792520857
KKR	2015-12-13 09:07:00	23.2295	-25.50858	0.85393740374694	868.169693809389
KKR	2015-12-13 10:07:00	23.23837	-25.51217	0.987677644868453	987.677644868452
KKR	2015-12-13 11:06:00	23.24432	-25.51088	0.632636625332769	622.092681577223
KKR	2015-12-13 15:06:00	23.2487	-25.50857	0.128792033291164	515.168133164656
KKR	2015-12-13 16:07:00	23.25018	-25.50875	0.149360134348069	151.849469920537
KKR	2015-12-13 17:06:00	23.2514	-25.51012	0.200729744643407	197.38424889935
KKR	2015-12-13 18:06:00	23.25377	-25.51125	0.272244531484475	272.244531484475
KKR	2015-12-13 19:07:00	23.26693	-25.51678	1.45050785351512	1474.68298440704
KKR	2015-12-13 20:06:00	23.2862	-25.52798	2.36615701384837	2326.72106361757
KKR	2015-12-13 21:07:00	23.31707	-25.52908	3.0892286735451	3140.71581810419
KKR	2015-12-13 22:06:00	23.31895	-25.52702	0.304740122101597	299.661120066571
KKR	2015-12-13 23:06:00	23.31898	-25.52555	0.164728628783731	164.728628783731
KKR	2015-12-14 00:06:00	23.31697	-25.52888	0.425387285095306	425.387285095306
KKR	2015-12-14 01:06:00	23.30728	-25.52257	1.2125422305848	1212.5422305848
KKR	2015-12-14 02:06:00	23.29215	-25.51167	1.96416567428233	1964.16567428233
KKR	2015-12-14 03:06:00	23.26867	-25.50918	2.40375410093916	2403.75410093916
KKR	2015-12-14 04:06:00	23.23725	-25.51353	3.23202573727764	3232.02573727764
KKR	2015-12-14 05:06:00	23.22597	-25.49908	1.98449746084136	1984.49746084136
KKR	2015-12-14 06:06:00	23.21708	-25.4909	1.28761670911705	1287.61670911705
KKR	2015-12-14 07:06:00	23.21788	-25.4891	0.217518311640134	217.518311640134
KKR	2015-12-14 08:06:00	23.2176	-25.48877	0.0466784105935158	46.6784105935158
KKR	2015-12-14 09:06:00	23.2166	-25.4887	0.10201907026749	102.01907026749
KKR	2015-12-14 10:06:00	23.21652	-25.48893	0.027029912641774	27.029912641774
KKR	2015-12-14 11:06:00	23.2162	-25.48792	0.117777211406761	117.777211406761
KKR	2015-12-14 12:06:00	23.21653	-25.48802	0.0353882973813621	35.3882973813621
KKR	2015-12-14 13:07:00	23.21653	-25.48798	0.00440928591136832	4.48277400989113
KKR	2015-12-14 14:06:00	23.21785	-25.48733	0.155344398241673	152.755324937645
KKR	2015-12-14 15:06:00	23.21802	-25.48788	0.0640175651142661	64.0175651142661
KKR	2015-12-14 16:06:00	23.21815	-25.48873	0.0961719880381201	96.1719880381201
KKR	2015-12-14 17:06:00	23.2179	-25.48837	0.0476901473277429	47.6901473277429
KKR	2015-12-14 18:07:00	23.21815	-25.48673	0.182502221141122	185.543924826808
KKR	2015-12-14 19:06:00	23.21817	-25.48505	0.191478074282494	188.286773044452
KKR	2015-12-14 20:06:00	23.2206	-25.48665	0.305366076039657	305.366076039657
KKR	2015-12-14 21:07:00	23.2267	-25.48442	0.657952173840006	668.918043404006
KKR	2015-12-14 22:06:00	23.22682	-25.48375	0.0773596200963864	76.07029309478
KKR	2015-12-14 23:07:00	23.22807	-25.48453	0.151767109759296	154.296561588617
KKR	2015-12-15 00:07:00	23.23017	-25.48468	0.21426730675345	214.26730675345
KKR	2015-12-15 01:06:00	23.23148	-25.4846	0.135814248782753	133.550677969707
KKR	2015-12-15 02:07:00	23.23255	-25.4851	0.120406851502384	122.413632360757
KKR	2015-12-15 03:07:00	23.23313	-25.48508	0.0590379699465257	59.0379699465257
KKR	2015-12-15 04:07:00	23.23305	-25.48502	0.0105558643854446	10.5558643854446
KKR	2015-12-15 05:07:00	23.2332	-25.4854	0.045235374957655	45.235374957655
KKR	2015-12-15 06:06:00	23.23453	-25.4854	0.137574798008316	135.281884708177
KKR	2015-12-15 07:06:00	23.23415	-25.487	0.183421844913531	183.421844913531
KKR	2015-12-15 08:06:00	23.23495	-25.48777	0.118604986515873	118.604986515873
KKR	2015-12-15 09:06:00	23.23588	-25.48887	0.155381637033945	155.381637033945
KKR	2015-12-15 10:07:00	23.23708	-25.48947	0.137064823443601	139.349237167661
KKR	2015-12-15 11:06:00	23.23827	-25.49078	0.193489989586367	190.265156426595
KKR	2015-12-15 12:07:00	23.23783	-25.49102	0.0513563866925884	52.2123264707982
KKR	2015-12-15 13:09:00	23.23643	-25.49408	0.35932572952161	371.303253838997
KKR	2015-12-15 14:06:00	23.2375	-25.49448	0.123891616689226	117.697035854764
KKR	2015-12-15 15:07:00	23.23773	-25.49475	0.0376183841631594	38.2453572325454
KKR	2015-12-15 16:07:00	23.23533	-25.4967	0.327620445153584	327.620445153584
KKR	2015-12-15 17:07:00	23.23098	-25.50577	1.10853289085602	1108.53289085602
KKR	2015-12-15 18:07:00	23.2308	-25.5143	0.95609178309712	956.09178309712
KKR	2015-12-15 20:46:00	23.28367	-25.52797	2.10934415916539	5589.76202178829
KKR	2015-12-15 21:44:00	23.31403	-25.5279	3.19292639581986	3086.4955159592
KKR	2015-12-15 23:11:00	23.31745	-25.52552	0.302181056889103	438.162532489199
KKR	2015-12-16 00:10:00	23.31772	-25.52022	0.604529417886373	594.453927588267
KKR	2015-12-16 01:10:00	23.31235	-25.50247	2.0623352302343	2062.3352302343
KKR	2015-12-16 02:11:00	23.30783	-25.4885	1.60459654748435	1631.33982327575
KKR	2015-12-16 03:10:00	23.3054	-25.48797	0.258461999125829	254.154299140399
KKR	2015-12-16 04:10:00	23.29835	-25.47667	1.45504055737618	1455.04055737618
KKR	2015-12-16 05:10:00	23.29327	-25.45888	2.05921341572815	2059.21341572815
KKR	2015-12-16 06:10:00	23.28468	-25.4298	3.37356967325165	3373.56967325165
KKR	2015-12-16 07:10:00	23.2736	-25.4013	3.38671382208144	3386.71382208144
KKR	2015-12-16 08:11:00	23.26218	-25.38882	1.78865627296291	1818.46721084563
KKR	2015-12-16 09:10:00	23.26943	-25.38477	0.881055721032463	866.371459015255
KKR	2015-12-16 10:11:00	23.2729	-25.38243	0.432699266829424	439.910921276581
KKR	2015-12-16 11:11:00	23.28072	-25.3801	0.837756090155243	837.756090155243
KKR	2015-12-16 12:10:00	23.2885	-25.38023	0.805513553708254	792.088327813116
KKR	2015-12-16 14:16:00	23.28553	-25.37933	0.151762907660842	318.702106087768
KKR	2015-12-16 15:14:00	23.28132	-25.37928	0.443371151700032	428.59211331003
KKR	2015-12-16 16:16:00	23.2809	-25.38025	0.113029579160217	116.797231798891
KKR	2015-12-16 17:15:00	23.28092	-25.38177	0.173218919230988	170.331937243805
KKR	2015-12-16 18:15:00	23.28135	-25.38433	0.290174375715074	290.174375715074
KKR	2015-12-16 19:15:00	23.2856	-25.38573	0.460170845837465	460.170845837465
KKR	2015-12-16 20:14:00	23.29407	-25.38995	0.999950048945416	983.284214796326
KKR	2015-12-16 21:15:00	23.30295	-25.39712	1.18941840710505	1209.24204722347
KKR	2015-12-16 22:15:00	23.31457	-25.4031	1.35919699826499	1359.19699826499
KKR	2015-12-16 23:15:00	23.32002	-25.4034	0.555640653891084	555.640653891084
KKR	2015-12-17 00:16:00	23.34168	-25.41178	2.3564559987899	2395.7302654364
KKR	2015-12-17 01:15:00	23.3458	-25.41505	0.566171704137416	556.735509068459
KKR	2015-12-17 02:14:00	23.34757	-25.4205	0.647381380195003	636.591690525086
KKR	2015-12-17 05:15:00	23.34753	-25.41993	0.0212118105489296	63.9889618226042
KKR	2015-12-17 06:15:00	23.3425	-25.42083	0.521611484293928	521.611484293928
KKR	2015-12-17 07:14:00	23.33248	-25.42747	1.28342307240831	1262.03268786817
KKR	2015-12-17 09:19:00	23.32232	-25.43677	0.704497433279296	1467.70298599853
KKR	2015-12-17 10:19:00	23.32767	-25.43085	0.858017884827465	858.017884827465
KKR	2015-12-17 11:20:00	23.34342	-25.42712	1.62884013471404	1655.98747029261
KKR	2015-12-17 13:19:00	23.344	-25.43527	0.461339510643052	914.990029442052
KKR	2015-12-17 14:19:00	23.33155	-25.45198	2.26027982693303	2260.27982693303
KKR	2015-12-17 15:18:00	23.31462	-25.47117	2.80133801372046	2754.64904682512
KKR	2015-12-17 16:19:00	23.31033	-25.4899	2.10830347160381	2143.4418627972
KKR	2015-12-17 17:19:00	23.3149	-25.5099	2.28853533800393	2288.53533800393
KKR	2015-12-17 18:19:00	23.31712	-25.52892	2.14295617348365	2142.95617348365
KKR	2015-12-17 19:19:00	23.31345	-25.52218	0.842301870424825	842.301870424825
KKR	2015-12-17 20:19:00	23.31077	-25.5248	0.400507819188497	400.507819188497
KKR	2015-12-17 21:18:00	23.31688	-25.52907	0.79732031772775	784.031645765621
KKR	2015-12-17 22:19:00	23.30987	-25.52718	0.731240470023868	743.427811190933
KKR	2015-12-17 23:19:00	23.29795	-25.528	1.21528835328135	1215.28835328135
KKR	2015-12-18 00:18:00	23.28138	-25.51977	1.95308014696152	1920.52881117883
KKR	2015-12-18 01:18:00	23.27307	-25.50252	2.10953197329337	2109.53197329337
KKR	2015-12-18 02:19:00	23.27053	-25.49467	0.901737901866007	916.766866897108
KKR	2015-12-18 03:19:00	23.27023	-25.49457	0.0325022792087439	32.5022792087439
KKR	2015-12-18 04:18:00	23.26955	-25.49427	0.0781961723373557	76.8929027983998
KKR	2015-12-18 05:19:00	23.26748	-25.49305	0.246897150033412	251.012102533969
KKR	2015-12-18 06:19:00	23.26582	-25.49237	0.185223306509395	185.223306509395
KKR	2015-12-18 07:18:00	23.26325	-25.48827	0.537537354558139	528.578398648837
KKR	2015-12-18 08:18:00	23.25752	-25.48267	0.856405435059683	856.405435059683
KKR	2015-12-18 09:18:00	23.24985	-25.48067	0.811700248126864	811.700248126864
KKR	2015-12-18 10:51:00	23.24412	-25.48237	0.395597083467136	613.17547937406
KKR	2015-12-18 12:18:00	23.24408	-25.48212	0.0195236933685358	28.3093553843769
KKR	2015-12-18 13:19:00	23.24382	-25.4816	0.0629435102059815	63.9925687094145
KKR	2015-12-18 14:19:00	23.24392	-25.4815	0.0151341075247252	15.1341075247252
KKR	2015-12-18 16:24:00	23.24398	-25.4808	0.0377665760135964	78.6803666949925
KKR	2015-12-18 17:23:00	23.24413	-25.48067	0.0214530840297183	21.095532629223
KKR	2015-12-18 18:24:00	23.24545	-25.48065	0.132083839463236	134.285236787623
KKR	2015-12-18 19:23:00	23.24683	-25.48238	0.243404232724665	239.347495512587
KKR	2015-12-18 20:23:00	23.24975	-25.48727	0.62328795110426	623.28795110426
KKR	2015-12-18 21:24:00	23.25235	-25.49162	0.545477488237007	554.568779707624
KKR	2015-12-18 22:24:00	23.25282	-25.4926	0.11977072718469	119.77072718469
KKR	2015-12-18 23:25:00	23.25982	-25.49433	0.725749189090507	737.845008908682
KKR	2015-12-19 00:23:00	23.27037	-25.49963	1.26860510277378	1226.31826601465
KKR	2015-12-19 01:23:00	23.27873	-25.51677	2.10031920646555	2100.31920646555
KKR	2015-12-19 03:23:00	23.3169	-25.52883	2.05459419454066	4109.18838908133
KKR	2015-12-19 04:23:00	23.30902	-25.5273	0.81921198284567	819.21198284567
KKR	2015-12-19 05:23:00	23.28233	-25.5279	2.71424407645205	2714.24407645205
KKR	2015-12-19 06:22:00	23.27115	-25.50903	2.44131650365511	2400.62789526086
KKR	2015-12-19 07:23:00	23.25962	-25.50007	1.51833179265308	1543.63732253063
KKR	2015-12-19 08:23:00	23.24443	-25.49643	1.59776807452325	1597.76807452325
KKR	2015-12-19 09:23:00	23.23612	-25.49515	0.857255562446659	857.255562446659
KKR	2015-12-19 10:22:00	23.23578	-25.49273	0.278024398543152	273.390658567433
KKR	2015-12-19 11:23:00	23.2355	-25.49145	0.143844330771878	146.241736284743
KKR	2015-12-19 13:25:00	23.23477	-25.49098	0.0447703049878718	91.0329534753394
KKR	2015-12-19 14:23:00	23.23458	-25.49142	0.0547862405128355	52.960032495741
KKR	2015-12-19 15:23:00	23.23503	-25.49123	0.0504799023002091	50.4799023002091
KKR	2015-12-19 16:23:00	23.23575	-25.49008	0.14822733306087	148.22733306087
KKR	2015-12-19 17:23:00	23.23618	-25.4897	0.0610430178225286	61.0430178225286
KKR	2015-12-19 18:24:00	23.23738	-25.49083	0.172993436974813	175.876660924393
KKR	2015-12-19 19:23:00	23.23765	-25.49138	0.0686196689167965	67.4760077681832
KKR	2015-12-19 20:23:00	23.23858	-25.49188	0.109939748563335	109.939748563335
KKR	2015-12-19 21:23:00	23.23877	-25.4951	0.361360679312391	361.360679312391
KKR	2015-12-19 22:23:00	23.23798	-25.50037	0.596013887839435	596.013887839435
KKR	2015-12-19 23:23:00	23.24187	-25.50402	0.569046336749216	569.046336749216
KKR	2015-12-20 00:23:00	23.24482	-25.50513	0.324770522289553	324.770522289553
KKR	2015-12-20 02:23:00	23.24608	-25.50535	0.0652433546899834	130.486709379967
KKR	2015-12-20 03:25:00	23.24647	-25.5067	0.151349907928326	156.394904859271
KKR	2015-12-20 04:23:00	23.24807	-25.50483	0.274455576086354	265.307056883475
KKR	2015-12-20 05:23:00	23.25035	-25.5039	0.254210028505214	254.210028505214
KKR	2015-12-20 06:23:00	23.25588	-25.50052	0.678035291800827	678.035291800827
KKR	2015-12-20 07:23:00	23.25913	-25.49627	0.579702247094745	579.702247094745
KKR	2015-12-20 08:24:00	23.25825	-25.49507	0.158881014350616	161.529031256459
KKR	2015-12-20 09:23:00	23.25747	-25.49372	0.173710786193209	170.815606423323
KKR	2015-12-20 10:23:00	23.257	-25.49373	0.0478134086221126	47.8134086221126
KKR	2015-12-20 11:25:00	23.2549	-25.49282	0.229037662428887	236.672251176517
KKR	2015-12-20 12:24:00	23.2569	-25.49188	0.23294677522787	229.064328974072
KKR	2015-12-20 16:34:00	23.26377	-25.4923	0.168068483708381	700.28534878492
KKR	2015-12-20 17:34:00	23.26618	-25.49507	0.395498038130984	395.498038130984
KKR	2015-12-20 18:35:00	23.27163	-25.5033	1.0583053690226	1075.94379183965
KKR	2015-12-20 19:33:00	23.27997	-25.51782	1.89802401113561	1834.75654409776
KKR	2015-12-20 20:35:00	23.30605	-25.5277	2.78065449714249	2873.34298038058
KKR	2015-12-20 21:34:00	23.31722	-25.52897	1.16381312191456	1144.41623654931
KKR	2015-12-20 22:34:00	23.31622	-25.53055	0.204137883331632	204.137883331632
KKR	2015-12-20 23:34:00	23.314	-25.53137	0.24366165540696	243.66165540696
KKR	2015-12-21 00:34:00	23.31715	-25.52898	0.41742847637327	417.42847637327
KKR	2015-12-21 01:34:00	23.31768	-25.51758	1.27840937075397	1278.40937075397
KKR	2015-12-21 02:33:00	23.30642	-25.50008	2.30901002636834	2270.52652592886
KKR	2015-12-21 03:34:00	23.28708	-25.48305	2.69538934803956	2740.31250384022
KKR	2015-12-21 04:33:00	23.26752	-25.4613	3.19944661128664	3146.12250109853
KKR	2015-12-21 05:36:00	23.25938	-25.46258	0.800381778698998	840.400867633948
KKR	2015-12-21 06:34:00	23.25342	-25.4637	0.640510452651595	619.160104229875
KKR	2015-12-21 07:34:00	23.24992	-25.4626	0.37679006297188	376.79006297188
KKR	2015-12-21 08:35:00	23.24148	-25.46458	0.872282156246482	886.820192183923
KKR	2015-12-21 09:35:00	23.23997	-25.46582	0.207139340045441	207.139340045441
KKR	2015-12-21 10:34:00	23.23577	-25.46825	0.515256556491528	506.668947216669
KKR	2015-12-21 11:36:00	23.23128	-25.47295	0.674682381455299	697.171794170475
KKR	2015-12-21 12:34:00	23.23158	-25.47467	0.201882799317869	195.15337267394
KKR	2015-12-21 13:35:00	23.23147	-25.4748	0.0180687392078598	18.3698848613242
KKR	2015-12-21 14:35:00	23.22993	-25.47617	0.219346024051712	219.346024051712
KKR	2015-12-21 15:34:00	23.22942	-25.47668	0.0784964321969015	77.1881583269531
KKR	2015-12-21 16:34:00	23.22913	-25.4766	0.0308322978059646	30.8322978059646
KKR	2015-12-21 17:34:00	23.22858	-25.47863	0.234272768301117	234.272768301117
KKR	2015-12-21 18:33:00	23.23082	-25.48087	0.344764193042523	339.018123158481
KKR	2015-12-21 19:34:00	23.23195	-25.48223	0.187764257111538	190.89366139673
KKR	2015-12-21 20:34:00	23.23392	-25.48308	0.221873192062725	221.873192062725
KKR	2015-12-21 21:34:00	23.23658	-25.48457	0.317941979592098	317.941979592098
KKR	2015-12-21 22:34:00	23.24497	-25.48687	0.891451685401607	891.451685401607
KKR	2015-12-21 23:33:00	23.24847	-25.48848	0.405860117965973	399.09578266654
KKR	2015-12-22 01:41:00	23.25053	-25.4923	0.223403394187216	476.593907599395
KKR	2015-12-22 05:39:00	23.25233	-25.50077	0.243690356403592	966.638413734249
KKR	2015-12-22 06:40:00	23.24925	-25.50403	0.473324112990634	481.212848207145
KKR	2015-12-22 07:39:00	23.24888	-25.50615	0.244605926429804	240.529160989307
KKR	2015-12-22 08:40:00	23.24825	-25.50927	0.349622812142954	355.449859012004
KKR	2015-12-22 09:40:00	23.2487	-25.50967	0.0640568783669535	64.0568783669535
KKR	2015-12-22 10:40:00	23.24875	-25.50995	0.0317861998695745	31.7861998695745
KKR	2015-12-22 11:42:00	23.24583	-25.51153	0.334564462779627	345.716611538948
KKR	2015-12-22 12:40:00	23.24612	-25.51145	0.031885544860213	30.8226933648726
KKR	2015-12-22 15:40:00	23.26572	-25.5222	0.776253959121128	2328.76187736338
KKR	2015-12-22 16:40:00	23.2884	-25.52502	2.3274711290323	2327.4711290323
KKR	2015-12-22 17:40:00	23.31478	-25.52817	2.70500449534794	2705.00449534794
KKR	2015-12-22 18:40:00	23.31725	-25.52875	0.259368547925982	259.368547925982
KKR	2015-12-22 19:39:00	23.31487	-25.52422	0.57179927898185	562.269290998819
KKR	2015-12-22 20:40:00	23.31308	-25.52388	0.182872577359653	185.920453648981
KKR	2015-12-22 21:39:00	23.3113	-25.52512	0.23200874137594	228.141929019674
KKR	2015-12-22 22:40:00	23.31097	-25.52725	0.23704771875244	240.99851406498
KKR	2015-12-22 23:39:00	23.31507	-25.52702	0.424680242127987	417.60223809252
KKR	2015-12-23 00:39:00	23.318	-25.52185	0.651354693107141	651.354693107141
KKR	2015-12-23 01:39:00	23.30155	-25.50457	2.55848798622452	2558.48798622452
KKR	2015-12-23 02:40:00	23.27102	-25.50093	3.07987241449329	3131.20362140151
KKR	2015-12-23 03:40:00	23.25897	-25.49757	1.2819728571039	1281.9728571039
KKR	2015-12-23 04:39:00	23.25727	-25.49717	0.181632031170006	178.604830650506
KKR	2015-12-23 05:40:00	23.25727	-25.49615	0.112425519086666	114.299277738111
KKR	2015-12-23 06:39:00	23.25743	-25.49485	0.149065962157999	146.581529455366
KKR	2015-12-23 07:40:00	23.25638	-25.49383	0.153857875635022	156.422173562272
KKR	2015-12-23 08:39:00	23.25287	-25.49195	0.421534684784404	414.509106704664
KKR	2015-12-23 09:40:00	23.25173	-25.49172	0.116827348870555	118.774471351731
KKR	2015-12-23 10:41:00	23.25088	-25.49202	0.0912358255614396	92.7564226541303
KKR	2015-12-23 15:23:00	23.25145	-25.49025	0.0439669022253553	206.64444045917
KKR	2015-12-23 16:23:00	23.25163	-25.4901	0.0248535337670765	24.8535337670765
KKR	2015-12-23 17:23:00	23.25008	-25.49068	0.170518670402431	170.518670402431
KKR	2015-12-23 18:23:00	23.25	-25.48955	0.126889104215051	126.889104215051
KKR	2015-12-23 19:23:00	23.25138	-25.48858	0.177526138722636	177.526138722636
KKR	2015-12-23 20:22:00	23.25118	-25.48807	0.0616909211725468	60.6627391530044
KKR	2015-12-23 21:22:00	23.24978	-25.48823	0.143517255120667	143.517255120667
KKR	2015-12-23 22:23:00	23.25002	-25.48798	0.0365486721214927	37.1578166568509
KKR	2015-12-23 23:23:00	23.25017	-25.48837	0.0462898416867829	46.2898416867829
KKR	2015-12-24 00:22:00	23.25128	-25.48707	0.187427692871571	184.303897990378
KKR	2015-12-24 01:24:00	23.25098	-25.48448	0.282420628547998	291.834649499598
KKR	2015-12-24 03:22:00	23.24968	-25.48212	0.150343623334707	295.675792558258
KKR	2015-12-24 04:22:00	23.24827	-25.48217	0.143527203765186	143.527203765186
KKR	2015-12-24 05:22:00	23.24603	-25.48348	0.27103802701279	271.03802701279
KKR	2015-12-24 06:22:00	23.24393	-25.48527	0.293020434409225	293.020434409225
KKR	2015-12-24 07:22:00	23.24177	-25.4868	0.278684215032161	278.684215032161
KKR	2015-12-24 08:24:00	23.23918	-25.48782	0.27790119371544	287.164566839288
KKR	2015-12-24 09:23:00	23.23875	-25.48798	0.0480700905188501	47.2689223435359
KKR	2015-12-24 12:24:00	23.23898	-25.48892	0.0357698762375646	107.905793316653
KKR	2015-12-24 13:22:00	23.23942	-25.48842	0.0741831216626058	71.710350940519
KKR	2015-12-24 14:23:00	23.23815	-25.48878	0.133108647877275	135.327125341897
KKR	2015-12-24 15:23:00	23.23822	-25.48873	0.00906020814037453	9.06020814037453
KKR	2015-12-24 16:22:00	23.2395	-25.48938	0.151710899420505	149.182384430164
KKR	2015-12-24 17:22:00	23.2407	-25.49128	0.245420760985893	245.420760985893
KKR	2015-12-24 18:23:00	23.2426	-25.49502	0.453952396317516	461.518269589474
KKR	2015-12-24 19:22:00	23.24652	-25.49797	0.526685528126277	517.907435990839
KKR	2015-12-24 20:23:00	23.26223	-25.49987	1.58539136294582	1611.81455232825
KKR	2015-12-24 21:22:00	23.27745	-25.50803	1.82811813369442	1797.64949813284
KKR	2015-12-24 22:22:00	23.29102	-25.52563	2.40683123653305	2406.83123653305
KKR	2015-12-24 23:22:00	23.31713	-25.52908	2.68239668786609	2682.39668786609
KKR	2015-12-25 00:22:00	23.31452	-25.52723	0.33669470141895	336.69470141895
KKR	2015-12-25 01:22:00	23.31232	-25.53042	0.421621671660235	421.621671660235
KKR	2015-12-25 02:22:00	23.29418	-25.52788	1.86595709454126	1865.95709454126
KKR	2015-12-25 03:22:00	23.27825	-25.50937	2.63153797694739	2631.53797694739
KKR	2015-12-25 04:22:00	23.26603	-25.49333	2.18511139478086	2185.11139478086
KKR	2015-12-25 05:22:00	23.26363	-25.49205	0.283107289948986	283.107289948986
KKR	2015-12-25 06:22:00	23.26083	-25.49322	0.313498015370864	313.498015370864
KKR	2015-12-25 07:22:00	23.26068	-25.48658	0.744216262510419	744.216262510419
KKR	2015-12-25 08:22:00	23.25812	-25.48072	0.706397176004599	706.397176004599
KKR	2015-12-25 09:22:00	23.2436	-25.4835	1.50939003561057	1509.39003561057
KKR	2015-12-25 10:46:00	23.23885	-25.48608	0.402174428162652	563.044199427713
KKR	2015-12-25 11:22:00	23.23877	-25.48612	0.015483470141945	9.29008208516702
KKR	2015-12-25 12:24:00	23.23888	-25.48612	0.0108276031084937	11.1885232121101
KKR	2015-12-25 13:24:00	23.23742	-25.48592	0.150184377442348	150.184377442348
KKR	2015-12-25 14:24:00	23.23597	-25.48695	0.187283369905841	187.283369905841
KKR	2015-12-25 15:22:00	23.2348	-25.48657	0.130753681339166	126.395225294527
KKR	2015-12-25 16:22:00	23.2336	-25.48503	0.21138086209139	211.38086209139
KKR	2015-12-25 17:22:00	23.23263	-25.48437	0.123309670933182	123.309670933182
KKR	2015-12-25 18:22:00	23.23177	-25.48565	0.168012064932345	168.012064932345
KKR	2015-12-25 19:22:00	23.2323	-25.48907	0.387035386545282	387.035386545282
KKR	2015-12-25 20:22:00	23.23233	-25.49058	0.169245662770309	169.245662770309
KKR	2015-12-25 21:22:00	23.23358	-25.49218	0.219804477121885	219.804477121885
KKR	2015-12-25 22:23:00	23.23797	-25.49395	0.480567092273686	488.576543811581
KKR	2015-12-26 00:22:00	23.24168	-25.49435	0.191589045628434	379.984940496393
KKR	2015-12-26 02:22:00	23.24278	-25.49437	0.0559494661817127	111.898932363425
KKR	2015-12-26 03:22:00	23.24393	-25.4937	0.138986654431747	138.986654431747
KKR	2015-12-26 05:23:00	23.24492	-25.49417	0.0563464368655757	113.631981012244
KKR	2015-12-26 06:22:00	23.2455	-25.49402	0.0623769307742624	61.337315261358
KKR	2015-12-26 07:22:00	23.24728	-25.49512	0.219016520492627	219.016520492627
KKR	2015-12-26 08:22:00	23.24918	-25.48917	0.694199040495107	694.199040495107
KKR	2015-12-26 09:22:00	23.25235	-25.48802	0.347217146031617	347.217146031617
KKR	2015-12-26 10:22:00	23.25303	-25.48902	0.131683906664178	131.683906664178
KKR	2015-12-26 12:23:00	23.2534	-25.48917	0.0204373032124737	41.2152281451552
KKR	2015-12-26 13:23:00	23.25732	-25.49173	0.491168277761508	491.168277761508
KKR	2015-12-26 14:22:00	23.25733	-25.49138	0.0398985078033132	39.2335326732579
KKR	2015-12-26 15:22:00	23.25748	-25.4919	0.0602341596481296	60.2341596481296
KKR	2015-12-26 16:23:00	23.25832	-25.4952	0.373309369866596	379.531192697706
KKR	2015-12-26 17:22:00	23.26017	-25.49693	0.274727317374482	270.148528751574
KKR	2015-12-26 18:23:00	23.26445	-25.4973	0.430072039769263	437.23990709875
KKR	2015-12-26 19:22:00	23.26882	-25.4983	0.466092784541468	458.324571465777
KKR	2015-12-26 20:22:00	23.2754	-25.50828	1.30319660250385	1303.19660250385
KKR	2015-12-26 21:23:00	23.29782	-25.52318	2.77925714138248	2825.57809373886
KKR	2015-12-26 22:22:00	23.31717	-25.52905	2.10935729791649	2074.20134295121
KKR	2015-12-26 23:22:00	23.31363	-25.52663	0.450584120008421	450.584120008421
KKR	2015-12-27 00:22:00	23.31488	-25.52638	0.13012591216379	130.12591216379
KKR	2015-12-27 01:22:00	23.3046	-25.52785	1.05797331569395	1057.97331569395
KKR	2015-12-27 02:22:00	23.2824	-25.52337	2.31213835360227	2312.13835360227
KKR	2015-12-27 03:22:00	23.27033	-25.50862	2.05860373078795	2058.60373078795
KKR	2015-12-27 04:22:00	23.26977	-25.50717	0.172169026740294	172.169026740294
KKR	2015-12-27 05:22:00	23.26665	-25.50123	0.737357955910312	737.357955910312
KKR	2015-12-27 06:22:00	23.26287	-25.49927	0.442726465662471	442.726465662471
KKR	2015-12-27 07:22:00	23.26075	-25.4999	0.226860480339452	226.860480339452
KKR	2015-12-27 08:22:00	23.2589	-25.49713	0.362966459205888	362.966459205888
KKR	2015-12-27 09:23:00	23.25693	-25.49287	0.509219482196918	517.706473566866
KKR	2015-12-27 10:22:00	23.25342	-25.49043	0.457286088363764	449.664653557701
KKR	2015-12-27 11:22:00	23.25057	-25.48913	0.324413794002282	324.413794002282
KKR	2015-12-27 12:23:00	23.24728	-25.48685	0.41411242225039	421.014295954563
KKR	2015-12-27 13:25:00	23.24732	-25.48757	0.0781803548738389	80.7863667029669
KKR	2015-12-27 14:23:00	23.24662	-25.48748	0.0743878039051319	71.9082104416275
KKR	2015-12-27 15:23:00	23.24472	-25.48677	0.208989175969903	208.989175969903
KKR	2015-12-27 16:22:00	23.2455	-25.48635	0.0938092494789519	92.245761987636
KKR	2015-12-27 17:22:00	23.24532	-25.48608	0.035364540222013	35.364540222013
KKR	2015-12-27 18:22:00	23.24443	-25.48587	0.0935329400849542	93.5329400849542
KKR	2015-12-27 19:22:00	23.24388	-25.48813	0.259364378528531	259.364378528531
KKR	2015-12-27 20:22:00	23.24473	-25.49077	0.308216146425338	308.216146425338
KKR	2015-12-27 21:23:00	23.24438	-25.4914	0.077769646580388	79.0658073567278
KKR	2015-12-27 22:23:00	23.24813	-25.49193	0.385998701665412	385.998701665412
KKR	2015-12-27 23:23:00	23.24857	-25.49185	0.0456399835653381	45.6399835653381
KKR	2015-12-28 00:23:00	23.24888	-25.49165	0.0386830910446725	38.6830910446725
KKR	2015-12-28 02:23:00	23.25022	-25.49187	0.0692491584195656	138.498316839131
KKR	2015-12-28 03:24:00	23.25162	-25.49242	0.152611031204245	155.154548390983
KKR	2015-12-28 05:23:00	23.25315	-25.49163	0.0902665548566995	179.028667132454
KKR	2015-12-28 06:22:00	23.25347	-25.49227	0.0800919555475509	78.7570896217584
KKR	2015-12-28 07:22:00	23.25478	-25.49262	0.138885907472425	138.885907472425
KKR	2015-12-28 08:22:00	23.25603	-25.4933	0.148217423135023	148.217423135023
KKR	2015-12-28 09:23:00	23.2567	-25.49387	0.0918658917148487	93.3969899100962
KKR	2015-12-28 10:23:00	23.25772	-25.49475	0.143127127725595	143.127127725595
KKR	2015-12-28 11:23:00	23.25813	-25.495	0.0502344935068066	50.2344935068066
KKR	2015-12-28 12:22:00	23.25972	-25.4952	0.166017399859267	163.250443194946
KKR	2015-12-28 13:22:00	23.26268	-25.49497	0.302134922232065	302.134922232065
KKR	2015-12-28 14:22:00	23.2641	-25.4948	0.145665255800653	145.665255800653
KKR	2015-12-28 15:22:00	23.26533	-25.49512	0.130128732049313	130.128732049313
KKR	2015-12-28 16:22:00	23.26537	-25.49617	0.117729011057153	117.729011057153
KKR	2015-12-28 17:22:00	23.26757	-25.4978	0.288822585485337	288.822585485337
KKR	2015-12-28 18:22:00	23.27027	-25.49957	0.338719199379332	338.719199379332
KKR	2015-12-28 19:22:00	23.28145	-25.5084	1.50714189700857	1507.14189700857
KKR	2015-12-28 20:22:00	23.30648	-25.5203	2.87308676126486	2873.08676126486
KKR	2015-12-28 21:22:00	23.31707	-25.52872	1.43146503562976	1431.46503562976
KKR	2015-12-28 22:22:00	23.3177	-25.52783	0.118512330934472	118.512330934472
KKR	2015-12-28 23:22:00	23.31805	-25.52483	0.338002124129168	338.002124129168
KKR	2015-12-29 00:22:00	23.31775	-25.52382	0.117199596122125	117.199596122125
KKR	2015-12-29 01:22:00	23.31597	-25.52383	0.180961825061529	180.961825061529
KKR	2015-12-29 02:22:00	23.31697	-25.52878	0.563846934171616	563.846934171616
KKR	2015-12-29 03:22:00	23.30378	-25.5207	1.61792696605801	1617.92696605801
KKR	2015-12-29 04:22:00	23.28623	-25.51183	2.04249002205115	2042.49002205115
KKR	2015-12-29 05:22:00	23.27008	-25.49852	2.21840646860333	2218.40646860333
KKR	2015-12-29 06:22:00	23.26942	-25.49732	0.150286440345682	150.286440345682
KKR	2015-12-29 07:23:00	23.26598	-25.49787	0.349400776504484	355.224122779559
KKR	2015-12-29 08:22:00	23.26543	-25.49762	0.0636168958564474	62.5566142588399
KKR	2015-12-29 09:22:00	23.26552	-25.49707	0.0623066596261095	62.3066596261095
KKR	2015-12-29 10:23:00	23.26593	-25.49528	0.201509471652725	204.867962846937
KKR	2015-12-29 13:23:00	23.2622	-25.49133	0.194313038195458	582.939114586375
KKR	2015-12-29 14:23:00	23.26107	-25.49235	0.162085576541902	162.085576541902
KKR	2015-12-29 15:23:00	23.26115	-25.49247	0.0157167448137568	15.7167448137568
KKR	2015-12-29 16:22:00	23.26122	-25.4913	0.133525353584339	131.2999310246
KKR	2015-12-29 17:23:00	23.26108	-25.48978	0.168118917176329	170.920899129268
KKR	2015-12-29 18:23:00	23.26108	-25.4892	0.064993132558106	64.993132558106
KKR	2015-12-29 19:22:00	23.26083	-25.48757	0.187540139829654	184.414470832493
KKR	2015-12-29 20:22:00	23.2609	-25.487	0.0642681650004867	64.2681650004867
KKR	2015-12-29 22:23:00	23.2609	-25.4865	0.0277827754097087	56.0285970762459
KKR	2015-12-29 23:22:00	23.26147	-25.48662	0.0605212543944517	59.5125668212109
KKR	2015-12-30 00:23:00	23.26265	-25.48707	0.12804385196113	130.177916160482
KKR	2015-12-30 01:22:00	23.26125	-25.48577	0.207158556872261	203.705914257723
KKR	2015-12-30 04:22:00	23.2584	-25.48495	0.101362226237194	304.086678711581
KKR	2015-12-30 05:22:00	23.2591	-25.48408	0.120720321760608	120.720321760608
KKR	2015-12-30 06:22:00	23.25693	-25.48362	0.226652296036222	226.652296036222
KKR	2015-12-30 07:22:00	23.25463	-25.4831	0.241085589403175	241.085589403175
KKR	2015-12-30 08:23:00	23.25273	-25.48455	0.248345337236777	252.484426190724
KKR	2015-12-30 09:22:00	23.2525	-25.48493	0.0494088875352872	48.5854060763657
KKR	2015-12-30 10:23:00	23.2505	-25.4864	0.257464257412094	261.755328368962
KKR	2015-12-30 11:22:00	23.2501	-25.48682	0.0632665253215432	62.2120832328508
KKR	2015-12-30 12:23:00	23.25028	-25.48828	0.161930075521942	164.628910113975
KKR	2015-12-30 13:24:00	23.2505	-25.48815	0.0262626106013243	26.7003207780131
KKR	2015-12-30 17:08:00	23.25653	-25.49318	0.22311603173645	832.966518482746
KKR	2015-12-30 18:06:00	23.26068	-25.49478	0.474379712361602	458.567055282882
KKR	2015-12-30 19:06:00	23.2669	-25.4974	0.69737798214445	697.37798214445
KKR	2015-12-30 20:26:00	23.28718	-25.51208	1.97844161601077	2637.92215468103
KKR	2015-12-30 21:23:00	23.30757	-25.52747	2.83842534877816	2696.50408133925
KKR	2015-12-30 22:23:00	23.317	-25.52883	0.970682910971865	970.682910971865
KKR	2015-12-30 23:23:00	23.31553	-25.53007	0.204042240325107	204.042240325107
KKR	2015-12-31 00:24:00	23.31162	-25.53113	0.408042011508506	414.842711700314
KKR	2015-12-31 01:23:00	23.31033	-25.53023	0.168229693256032	165.425865035099
KKR	2015-12-31 02:24:00	23.31405	-25.52593	0.602439018508166	612.479668816636
KKR	2015-12-31 03:23:00	23.2976	-25.51767	1.94380904485601	1911.41222744174
KKR	2015-12-31 04:23:00	23.27443	-25.50307	2.8682388440796	2868.2388440796
KKR	2015-12-31 05:23:00	23.26677	-25.49865	0.923091308324511	923.091308324511
KKR	2015-12-31 06:23:00	23.26082	-25.49423	0.781963110114664	781.963110114664
KKR	2015-12-31 08:24:00	23.25103	-25.48982	0.551195505403145	1111.57760256301
KKR	2015-12-31 09:24:00	23.25015	-25.48928	0.108039524320017	108.039524320017
KKR	2015-12-31 10:24:00	23.24998	-25.4893	0.0174350627882556	17.4350627882556
KKR	2015-12-31 11:24:00	23.24933	-25.48915	0.0682139523614043	68.2139523614044
KKR	2015-12-31 12:24:00	23.24882	-25.48758	0.183422341126885	183.422341126885
KKR	2015-12-31 14:24:00	23.24623	-25.48722	0.133250746696847	266.501493393693
KKR	2015-12-31 15:24:00	23.24522	-25.48612	0.160462062345482	160.462062345482
KKR	2015-12-31 16:24:00	23.24325	-25.48642	0.203174048720057	203.174048720057
KKR	2015-12-31 17:24:00	23.24305	-25.4877	0.144874711095615	144.874711095615
KKR	2015-12-31 18:24:00	23.24457	-25.48942	0.247087684118508	247.087684118508
KKR	2015-12-31 19:23:00	23.24413	-25.49113	0.200117062366471	196.781777993697
KKR	2015-12-31 21:24:00	23.24392	-25.49442	0.183124646441812	369.301370324321
KKR	2015-12-31 22:23:00	23.24372	-25.49415	0.0370765236683539	36.4585816072147
KKR	2015-12-31 23:23:00	23.24178	-25.49432	0.198226943832088	198.226943832088
KKR	2016-01-01 00:26:00	23.24242	-25.49422	0.0629042222084699	66.0494333188934
KKR	2016-01-01 01:23:00	23.24158	-25.49412	0.090699959919634	86.1649619236523
KKR	2016-01-01 02:23:00	23.24158	-25.49282	0.145681165608663	145.681165608663
KKR	2016-01-01 03:23:00	23.24255	-25.49248	0.10575794935052	105.75794935052
KKR	2016-01-01 04:23:00	23.24383	-25.49182	0.149728184609539	149.728184609539
KKR	2016-01-01 05:23:00	23.24292	-25.49187	0.0927235260514028	92.7235260514028
KKR	2016-01-01 06:24:00	23.2473	-25.48535	0.841715511293407	855.744103148297
KKR	2016-01-01 07:24:00	23.24973	-25.48627	0.267799406287716	267.799406287716
KKR	2016-01-01 08:24:00	23.25052	-25.48618	0.0809821143600476	80.9821143600476
KKR	2016-01-01 10:24:00	23.25053	-25.48663	0.025218636348917	50.4372726978339
KKR	2016-01-01 11:24:00	23.25087	-25.4876	0.114066512154923	114.066512154923
KKR	2016-01-01 12:25:00	23.25042	-25.4881	0.0711616305821783	72.347657758548
KKR	2016-01-01 13:24:00	23.25077	-25.48848	0.0564431925861183	55.502472709683
KKR	2016-01-01 14:23:00	23.24973	-25.49052	0.256157743953141	251.888448220589
KKR	2016-01-01 15:23:00	23.25127	-25.49155	0.19456265628393	194.56265628393
KKR	2016-01-01 16:24:00	23.25158	-25.49227	0.0852044787901186	86.6245534366206
KKR	2016-01-01 17:24:00	23.25328	-25.49423	0.279524067506555	279.524067506555
KKR	2016-01-01 18:23:00	23.2576	-25.49518	0.459729355183505	452.06719926378
KKR	2016-01-01 19:23:00	23.26558	-25.49888	0.911331770442214	911.331770442214
KKR	2016-01-01 20:23:00	23.27485	-25.5055	1.19955277572805	1199.55277572805
KKR	2016-01-01 22:23:00	23.31415	-25.52775	2.35486761435595	4709.73522871191
KKR	2016-01-01 23:24:00	23.31705	-25.5288	0.312212288862272	317.415827009977
KKR	2016-01-02 00:23:00	23.32065	-25.5308	0.436390459219423	429.1172848991
KKR	2016-01-02 01:23:00	23.30865	-25.5445	1.96063430916003	1960.63430916003
KKR	2016-01-02 02:24:00	23.29472	-25.54907	1.48098781383816	1505.6709440688
KKR	2016-01-02 03:24:00	23.27523	-25.56718	2.83584210734394	2835.84210734394
KKR	2016-01-02 04:23:00	23.2657	-25.5648	1.0216724715411	1004.64459701542
KKR	2016-01-02 06:28:00	23.2444	-25.55923	1.0815358131262	2253.19961067959
KKR	2016-01-02 07:27:00	23.24267	-25.55655	0.353921866798042	348.023169018075
KKR	2016-01-02 08:27:00	23.24388	-25.55137	0.593367441648273	593.367441648273
KKR	2016-01-02 09:27:00	23.24935	-25.55908	1.02744931690863	1027.44931690863
KKR	2016-01-02 10:29:00	23.25078	-25.56333	0.481878245412226	497.940853592634
KKR	2016-01-02 11:28:00	23.25063	-25.56328	0.0165188764780358	16.2435618700686
KKR	2016-01-02 12:28:00	23.25117	-25.56398	0.0957378740514089	95.7378740514089
KKR	2016-01-02 13:28:00	23.2523	-25.56432	0.121011265388617	121.011265388617
KKR	2016-01-02 14:28:00	23.26002	-25.56663	0.826262906367318	826.262906367318
KKR	2016-01-02 15:27:00	23.27645	-25.56798	1.70514400813967	1676.72494133734
KKR	2016-01-02 16:27:00	23.26893	-25.5639	0.890604542710012	890.604542710012
KKR	2016-01-02 18:27:00	23.26245	-25.55597	0.553043278786838	1106.08655757368
KKR	2016-01-02 19:27:00	23.26288	-25.55308	0.326778870427114	326.778870427114
KKR	2016-01-02 20:27:00	23.26103	-25.54492	0.93351937904384	933.51937904384
KKR	2016-01-02 21:27:00	23.25692	-25.53555	1.13005983947362	1130.05983947362
KKR	2016-01-02 22:28:00	23.25722	-25.51827	1.90485404591067	1936.60161334251
KKR	2016-01-02 23:27:00	23.25677	-25.5144	0.443463029597187	436.0719791039
KKR	2016-01-03 00:27:00	23.2559	-25.50903	0.608221267095719	608.221267095719
KKR	2016-01-03 01:28:00	23.25602	-25.50605	0.328678925878307	334.156907976279
KKR	2016-01-03 02:27:00	23.25598	-25.506	0.00704114212092057	6.92378975223856
KKR	2016-01-03 03:27:00	23.2553	-25.5021	0.442465408574002	442.465408574002
KKR	2016-01-03 04:28:00	23.25292	-25.49512	0.805343639866895	818.766033864676
KKR	2016-01-03 05:27:00	23.25225	-25.49105	0.468960215715085	461.144212119833
KKR	2016-01-03 06:27:00	23.25333	-25.48767	0.394367156325074	394.367156325074
KKR	2016-01-03 07:27:00	23.2511	-25.48045	0.840262608682276	840.262608682276
KKR	2016-01-03 08:27:00	23.24465	-25.47937	0.667143709937907	667.143709937907
KKR	2016-01-03 09:28:00	23.24137	-25.48102	0.375192846014511	381.446060114752
KKR	2016-01-03 10:27:00	23.24122	-25.48107	0.0165294341262626	16.2539435574915
KKR	2016-01-03 11:30:00	23.23932	-25.48125	0.185060532929441	194.313559575913
KKR	2016-01-03 12:28:00	23.23937	-25.4812	0.00782808312732191	7.56714702307785
KKR	2016-01-03 14:28:00	23.23938	-25.48165	0.0252193325385181	50.4386650770361
KKR	2016-01-03 16:27:00	23.23843	-25.48243	0.0656973717502679	130.299787304698
KKR	2016-01-03 17:27:00	23.23775	-25.48222	0.0730615996616212	73.0615996616212
KKR	2016-01-03 18:27:00	23.2389	-25.48298	0.144695084670352	144.695084670352
KKR	2016-01-03 19:27:00	23.24163	-25.48425	0.312030745431538	312.030745431538
KKR	2016-01-03 20:27:00	23.24507	-25.4848	0.355283434165291	355.283434165291
KKR	2016-01-03 21:28:00	23.24835	-25.48692	0.402845089005811	409.559173822574
KKR	2016-01-03 22:27:00	23.2485	-25.48735	0.0514003154505219	50.5436435263465
KKR	2016-01-03 23:30:00	23.24838	-25.48773	0.0421882384037093	44.2976503238948
KKR	2016-01-04 01:28:00	23.2489	-25.48783	0.0274898198997902	54.0633124695874
KKR	2016-01-04 03:27:00	23.24925	-25.48823	0.0288606495559943	57.2402882860553
KKR	2016-01-04 04:27:00	23.25165	-25.49	0.314525195988321	314.525195988321
KKR	2016-01-04 05:27:00	23.25113	-25.49083	0.106994817436427	106.994817436427
KKR	2016-01-04 06:27:00	23.25142	-25.49152	0.0827558067560033	82.7558067560033
KKR	2016-01-04 07:28:00	23.25373	-25.49285	0.273663625192715	278.224685612593
KKR	2016-01-04 08:27:00	23.257	-25.49435	0.378949979998193	372.634146998223
KKR	2016-01-04 09:27:00	23.25823	-25.49508	0.149465476702688	149.465476702688
KKR	2016-01-04 10:27:00	23.25863	-25.495	0.0416565560489209	41.6565560489209
KKR	2016-01-04 11:27:00	23.25962	-25.49517	0.102470361021834	102.470361021834
KKR	2016-01-04 12:30:00	23.26228	-25.49622	0.280954245579135	295.001957858092
KKR	2016-01-04 14:27:00	23.26237	-25.4969	0.039357092341361	76.746330065654
KKR	2016-01-04 15:28:00	23.26548	-25.49832	0.348246870727707	354.050985239835
KKR	2016-01-04 16:27:00	23.26795	-25.49927	0.277439211655212	272.815224794292
KKR	2016-01-04 17:27:00	23.27008	-25.50063	0.264846439755375	264.846439755375
KKR	2016-01-04 18:27:00	23.2766	-25.50488	0.816330337934464	816.330337934464
KKR	2016-01-04 19:27:00	23.29332	-25.51552	2.07648222940965	2076.48222940965
KKR	2016-01-04 20:27:00	23.31585	-25.5287	2.7253263041315	2725.3263041315
KKR	2016-01-04 21:27:00	23.31728	-25.52887	0.14661314738947	146.61314738947
KKR	2016-01-04 22:27:00	23.31368	-25.52875	0.366215822745254	366.215822745254
KKR	2016-01-04 23:27:00	23.3079	-25.52728	0.610241035610088	610.241035610088
KKR	2016-01-05 00:27:00	23.30192	-25.52258	0.804315410842376	804.315410842376
KKR	2016-01-05 01:27:00	23.29313	-25.51553	1.19275638160947	1192.75638160947
KKR	2016-01-05 02:27:00	23.27662	-25.50698	1.9328794216382	1932.8794216382
KKR	2016-01-05 03:27:00	23.27117	-25.50338	0.68546849636179	685.46849636179
KKR	2016-01-05 04:28:00	23.27065	-25.50282	0.080714804448545	82.0600511893541
KKR	2016-01-05 05:27:00	23.26943	-25.50355	0.151122071387197	148.60337019741
KKR	2016-01-05 06:27:00	23.26397	-25.49978	0.697683419800484	697.683419800484
KKR	2016-01-05 07:27:00	23.26452	-25.49385	0.666843289993934	666.843289993934
KKR	2016-01-05 08:27:00	23.24573	-25.48883	1.99211668266356	1992.11668266356
KKR	2016-01-05 09:27:00	23.24295	-25.48578	0.443589010234016	443.589010234016
KKR	2016-01-05 11:28:00	23.24103	-25.4858	0.0968442057714536	195.302481639098
KKR	2016-01-05 13:28:00	23.2388	-25.48615	0.115093858323923	230.187716647845
KKR	2016-01-05 14:29:00	23.23897	-25.48615	0.0170078824121937	17.2913471190636
KKR	2016-01-05 15:28:00	23.23882	-25.48612	0.015887877443768	15.6230794863718
KKR	2016-01-05 16:27:00	23.2389	-25.48625	0.0169695110581665	16.6866858738638
KKR	2016-01-05 17:27:00	23.23922	-25.48792	0.189954782447291	189.954782447291
KKR	2016-01-05 18:27:00	23.24167	-25.48868	0.263345509571914	263.345509571914
KKR	2016-01-05 19:27:00	23.24297	-25.48947	0.159124124176301	159.124124176301
KKR	2016-01-05 20:27:00	23.24368	-25.49095	0.180891103158086	180.891103158086
KKR	2016-01-05 21:27:00	23.24443	-25.49077	0.078903216750331	78.903216750331
KKR	2016-01-05 22:27:00	23.24633	-25.49307	0.322139215704388	322.139215704389
KKR	2016-01-06 02:39:00	23.25173	-25.50073	0.242627226816034	1019.03435262734
KKR	2016-01-06 04:38:00	23.25573	-25.50882	0.500993173743572	993.636461258084
KKR	2016-01-06 05:38:00	23.2623	-25.5093	0.670258720898175	670.258720898175
KKR	2016-01-06 06:39:00	23.26653	-25.506	0.557944246899844	567.243317681508
KKR	2016-01-06 08:39:00	23.25657	-25.49757	0.692507827543757	1385.01565508751
KKR	2016-01-06 09:39:00	23.25455	-25.49677	0.224142411640989	224.142411640989
KKR	2016-01-06 10:39:00	23.2545	-25.49645	0.0362175910723948	36.2175910723948
KKR	2016-01-06 11:39:00	23.25445	-25.4967	0.0284724823775548	28.4724823775548
KKR	2016-01-06 13:39:00	23.25367	-25.49657	0.0403266480300976	80.6532960601952
KKR	2016-01-06 15:38:00	23.25343	-25.49595	0.0371291539280303	73.6394886239267
KKR	2016-01-06 16:38:00	23.25458	-25.49712	0.175693900873824	175.693900873824
KKR	2016-01-06 17:38:00	23.25873	-25.49968	0.510313859898	510.313859898
KKR	2016-01-06 18:39:00	23.26407	-25.5011	0.556611451111593	565.888308630119
KKR	2016-01-06 21:16:00	23.31733	-25.52888	2.38705599214076	6246.12984610166
KKR	2016-01-06 22:16:00	23.31618	-25.5304	0.206567500151392	206.567500151392
KKR	2016-01-07 00:15:00	23.3128	-25.53008	0.174184713495422	345.466348432586
KKR	2016-01-07 01:16:00	23.31708	-25.52877	0.451656838350625	459.184452323136
KKR	2016-01-07 02:15:00	23.30798	-25.52363	1.10819428858975	1089.72438377992
KKR	2016-01-07 03:16:00	23.30113	-25.51952	0.821216680919651	834.903625601646
KKR	2016-01-07 04:16:00	23.28017	-25.50848	2.46414543642204	2464.14543642204
KKR	2016-01-07 05:16:00	23.26475	-25.49908	1.88898902938391	1888.98902938391
KKR	2016-01-07 06:16:00	23.25717	-25.4953	0.879583830413531	879.583830413531
KKR	2016-01-07 07:16:00	23.249	-25.49128	0.945178918503583	945.178918503583
KKR	2016-01-07 08:16:00	23.24653	-25.48963	0.311927603374918	311.927603374918
KKR	2016-01-07 09:18:00	23.24332	-25.48857	0.33621834675058	347.4256249756
KKR	2016-01-07 11:16:00	23.24035	-25.4878	0.159744823584983	314.164819717133
KKR	2016-01-07 12:16:00	23.23883	-25.48808	0.15775439959601	157.75439959601
KKR	2016-01-07 13:16:00	23.23877	-25.48815	0.00993872814358208	9.93872814358208
KKR	2016-01-07 16:16:00	23.23787	-25.48823	0.0306596397314012	91.9789191942037
KKR	2016-01-07 17:16:00	23.23685	-25.48903	0.137115194933423	137.115194933423
KKR	2016-01-07 18:16:00	23.23802	-25.49177	0.329307785284689	329.307785284689
KKR	2016-01-07 19:15:00	23.23945	-25.4967	0.580977921935179	571.294956569592
KKR	2016-01-07 20:16:00	23.24178	-25.50043	0.472614734868389	480.491647116195
KKR	2016-01-07 21:15:00	23.24197	-25.50717	0.768352758242658	755.546878938614
KKR	2016-01-07 22:15:00	23.24113	-25.51275	0.631115422373401	631.115422373401
KKR	2016-01-07 23:16:00	23.22913	-25.51678	1.27983954490542	1301.17020398717
KKR	2016-01-08 00:15:00	23.23737	-25.52797	1.53372535752101	1508.16326822899
KKR	2016-01-08 01:16:00	23.25307	-25.52807	1.57018448941723	1596.35423090752
KKR	2016-01-08 02:15:00	23.27075	-25.52803	1.82803269517522	1797.56548358897
KKR	2016-01-08 03:15:00	23.28603	-25.52963	1.563785707279	1563.785707279
KKR	2016-01-08 04:15:00	23.3137	-25.52785	2.82004761785531	2820.04761785531
KKR	2016-01-08 05:15:00	23.31593	-25.5261	0.299730625595684	299.730625595684
KKR	2016-01-08 06:15:00	23.31198	-25.5246	0.435313520732418	435.313520732418
KKR	2016-01-08 07:15:00	23.30075	-25.51907	1.2990071751866	1299.0071751866
KKR	2016-01-08 08:15:00	23.28818	-25.51525	1.34780265169026	1347.80265169026
KKR	2016-01-08 09:15:00	23.28375	-25.51192	0.584906828071545	584.906828071545
KKR	2016-01-08 11:16:00	23.26998	-25.50578	0.773602658471037	1560.09869458326
KKR	2016-01-08 12:16:00	23.26988	-25.5057	0.0135560619781454	13.5560619781454
KKR	2016-01-08 13:15:00	23.26315	-25.50337	0.744907484249328	732.492359511839
KKR	2016-01-08 14:16:00	23.26272	-25.50293	0.0648219377848471	65.9023034145945
KKR	2016-01-08 15:16:00	23.26103	-25.50102	0.274491002746221	274.491002746221
KKR	2016-01-08 16:15:00	23.25835	-25.49593	0.642860290694455	632.145952516214
KKR	2016-01-08 17:15:00	23.2592	-25.49402	0.230828648087713	230.828648087713
KKR	2016-01-08 18:15:00	23.26048	-25.49295	0.176982789902836	176.982789902836
KKR	2016-01-08 19:15:00	23.26117	-25.49127	0.200910188159589	200.910188159589
KKR	2016-01-08 20:15:00	23.26225	-25.48873	0.305084055496126	305.084055496126
KKR	2016-01-08 21:15:00	23.26132	-25.488	0.125052603000644	125.052603000644
KKR	2016-01-08 22:16:00	23.26212	-25.48863	0.105956132484442	107.72206802585
KKR	2016-01-08 23:15:00	23.26443	-25.49348	0.602115144864429	592.079892450021
KKR	2016-01-09 00:15:00	23.26822	-25.49662	0.52188702453277	521.88702453277
KKR	2016-01-09 01:15:00	23.27307	-25.50185	0.765972179455533	765.972179455533
KKR	2016-01-09 02:15:00	23.29097	-25.49782	1.87544955036357	1875.44955036357
KKR	2016-01-09 04:15:00	23.28765	-25.46775	1.69310215593098	3386.20431186196
KKR	2016-01-09 05:15:00	23.26952	-25.46297	1.92042095958346	1920.42095958346
KKR	2016-01-09 06:15:00	23.2563	-25.47143	1.64534926089295	1645.34926089295
KKR	2016-01-09 07:15:00	23.24463	-25.47965	1.50254158664987	1502.54158664987
KKR	2016-01-09 08:15:00	23.2428	-25.48243	0.362906600631799	362.906600631799
KKR	2016-01-09 09:15:00	23.24247	-25.48258	0.0375399681410797	37.5399681410797
KKR	2016-01-09 10:15:00	23.24233	-25.48245	0.0203718965556632	20.3718965556632
KKR	2016-01-09 11:16:00	23.24238	-25.4825	0.00744300467889787	7.5670547568795
KKR	2016-01-09 13:15:00	23.24305	-25.48467	0.127333000598195	252.543784519754
KKR	2016-01-09 16:31:00	23.24438	-25.48825	0.129604688829489	423.375316842996
KKR	2016-01-09 17:31:00	23.2453	-25.48907	0.131148138491471	131.148138491471
KKR	2016-01-09 18:30:00	23.2514	-25.49557	0.973015185699724	956.798265938062
KKR	2016-01-09 19:29:00	23.2538	-25.49938	0.50012697101254	491.791521495665
KKR	2016-01-09 20:30:00	23.27163	-25.50888	2.06811180832613	2102.5803384649
KKR	2016-01-09 21:29:00	23.2937	-25.52378	2.84437070338325	2796.96452499353
KKR	2016-01-09 22:30:00	23.3172	-25.52898	2.41877684989205	2459.08979739025
KKR	2016-01-09 23:30:00	23.31618	-25.53133	0.282979434123452	282.979434123452
KKR	2016-01-10 00:29:00	23.30605	-25.53698	1.22926834044076	1208.78053476675
KKR	2016-01-10 01:29:00	23.29307	-25.5531	2.23676019515513	2236.76019515513
KKR	2016-01-10 02:29:00	23.27643	-25.568	2.37649911972824	2376.49911972824
KKR	2016-01-10 03:29:00	23.27088	-25.55863	1.19187754971492	1191.87754971492
KKR	2016-01-10 04:29:00	23.26298	-25.54232	1.99626432868771	1996.26432868771
KKR	2016-01-10 05:29:00	23.25817	-25.52	2.54847193173814	2548.47193173814
KKR	2016-01-10 06:29:00	23.25132	-25.50112	2.22738862455922	2227.38862455922
KKR	2016-01-10 07:31:00	23.24685	-25.49173	1.10927597583203	1146.2518416931
KKR	2016-01-10 08:29:00	23.24242	-25.48992	0.511156056301449	494.117521091401
KKR	2016-01-10 10:30:00	23.23937	-25.48838	0.17602793360952	354.989666112532
KKR	2016-01-10 11:30:00	23.23937	-25.48837	0.00112063078098409	1.12063078098409
KKR	2016-01-10 12:29:00	23.2397	-25.48857	0.0410439921503552	40.3599256145159
KKR	2016-01-10 13:28:00	23.23912	-25.48877	0.0641763451856392	63.1067394325452
KKR	2016-01-10 14:28:00	23.23713	-25.48807	0.217076251689923	217.076251689923
KKR	2016-01-10 15:28:00	23.23605	-25.48745	0.129978619098692	129.978619098692
KKR	2016-01-10 16:29:00	23.23405	-25.48898	0.261683859120587	266.045256772597
KKR	2016-01-10 17:28:00	23.23403	-25.49035	0.1561442875669	153.541882774119
KKR	2016-01-10 18:28:00	23.23617	-25.49185	0.275013532308855	275.013532308855
KKR	2016-01-10 19:28:00	23.23817	-25.49468	0.376770491034415	376.770491034415
KKR	2016-01-10 20:29:00	23.23945	-25.49402	0.147273119963769	149.727671963165
KKR	2016-01-10 21:28:00	23.23988	-25.4938	0.0510552333445673	50.2043127888246
KKR	2016-01-10 23:29:00	23.2404	-25.49347	0.0320004926329441	64.5343268097706
KKR	2016-01-11 00:28:00	23.24085	-25.49382	0.0612966533591516	60.2750424698324
KKR	2016-01-11 02:28:00	23.2406	-25.49317	0.0385755508420108	77.1511016840215
KKR	2016-01-11 03:28:00	23.23922	-25.4923	0.17089549585679	170.89549585679
KKR	2016-01-11 04:28:00	23.23783	-25.49185	0.150099908871678	150.099908871678
KKR	2016-01-11 05:28:00	23.23528	-25.4916	0.260868178773077	260.868178773077
KKR	2016-01-11 06:28:00	23.2328	-25.49297	0.295289752261048	295.289752261048
KKR	2016-01-11 09:44:00	23.231	-25.4939	0.0644887380392429	210.663210928194
KKR	2016-01-11 10:42:00	23.23148	-25.49412	0.0565783377433102	54.6923931518665
KKR	2016-01-11 11:42:00	23.23345	-25.49442	0.203166494616785	203.166494616785
KKR	2016-01-11 12:42:00	23.23543	-25.49497	0.2106020094109	210.6020094109
KKR	2016-01-11 13:42:00	23.23687	-25.49462	0.151619185442966	151.619185442966
KKR	2016-01-11 14:42:00	23.24188	-25.49635	0.54518028840457	545.18028840457
KKR	2016-01-11 15:43:00	23.2475	-25.49317	0.662526859128045	673.568973446846
KKR	2016-01-11 16:43:00	23.25522	-25.49613	0.852339967145706	852.339967145706
KKR	2016-01-11 17:42:00	23.26477	-25.49818	1.0149388791745	998.023231188258
KKR	2016-01-11 18:42:00	23.2688	-25.50015	0.465503756353574	465.503756353574
KKR	2016-01-11 20:42:00	23.29025	-25.51417	1.34400371896814	2688.00743793627
KKR	2016-01-11 21:43:00	23.30462	-25.52128	1.63682861629377	1664.109093232
KKR	2016-01-11 22:52:00	23.31695	-25.52883	1.3149854225568	1512.23323594032
KKR	2016-01-11 23:52:00	23.3092	-25.52655	0.82824197129752	828.24197129752
KKR	2016-01-12 00:51:00	23.306	-25.52445	0.408297796623641	401.49283334658
KKR	2016-01-12 01:52:00	23.30493	-25.52348	0.151249908804774	153.770740618187
KKR	2016-01-12 02:51:00	23.30355	-25.52197	0.22351717824057	219.791891936561
KKR	2016-01-12 03:51:00	23.295	-25.51637	1.07208062343298	1072.08062343298
KKR	2016-01-12 04:52:00	23.27537	-25.50578	2.28401110579638	2322.07795755966
KKR	2016-01-12 05:52:00	23.26553	-25.50273	1.05738859441694	1057.38859441694
KKR	2016-01-12 06:51:00	23.26028	-25.49962	0.64837711864889	637.570833338075
KKR	2016-01-12 07:51:00	23.25585	-25.4953	0.661300654507555	661.300654507555
KKR	2016-01-12 08:52:00	23.25162	-25.49337	0.473614364131057	481.507936866574
KKR	2016-01-12 12:52:00	23.24238	-25.48955	0.258169364573078	1032.67745829231
KKR	2016-01-12 13:51:00	23.24255	-25.4895	0.0184839620485658	18.175896014423
KKR	2016-01-12 14:52:00	23.24042	-25.4903	0.230615234350569	234.458821589745
KKR	2016-01-12 15:52:00	23.23712	-25.49138	0.356796309933825	356.796309933825
KKR	2016-01-12 16:52:00	23.23483	-25.48918	0.339165464014489	339.165464014489
KKR	2016-01-12 17:52:00	23.23485	-25.48807	0.124408026257664	124.408026257664
KKR	2016-01-12 18:51:00	23.23603	-25.48862	0.137208887918954	134.922073120305
KKR	2016-01-12 19:51:00	23.2343	-25.49152	0.369564878632203	369.564878632203
KKR	2016-01-12 20:52:00	23.2352	-25.49272	0.160009084819249	162.67590289957
KKR	2016-01-12 22:52:00	23.23632	-25.49392	0.0881196417153745	176.239283430749
KKR	2016-01-12 23:51:00	23.23867	-25.49557	0.307307136484899	302.185350876817
KKR	2016-01-13 00:51:00	23.23913	-25.49652	0.116286338568369	116.286338568369
KKR	2016-01-13 01:51:00	23.2406	-25.49643	0.149845652741137	149.845652741137
KKR	2016-01-13 02:51:00	23.24082	-25.49655	0.0261050818420123	26.1050818420123
KKR	2016-01-13 06:52:00	23.24462	-25.4979	0.103326349556334	415.027504051274
KKR	2016-01-13 07:51:00	23.24723	-25.49765	0.271440613441533	266.916603217507
KKR	2016-01-13 08:51:00	23.25078	-25.49588	0.411938379955776	411.938379955776
KKR	2016-01-13 10:29:00	23.25547	-25.4942	0.313954826277951	512.792882920653
KKR	2016-01-13 10:52:00	23.2562	-25.49437	0.199951138625139	76.6479364729701
KKR	2016-01-13 11:53:00	23.25768	-25.49473	0.153276657128137	155.831268080272
KKR	2016-01-13 13:52:00	23.25837	-25.49515	0.0426026348024438	84.4952256915135
KKR	2016-01-13 14:51:00	23.2582	-25.49582	0.0783495456364662	77.0437198758585
KKR	2016-01-13 15:51:00	23.25833	-25.49642	0.0685222751305681	68.5222751305681
KKR	2016-01-13 16:51:00	23.26015	-25.49725	0.20714710632467	207.14710632467
KKR	2016-01-13 18:51:00	23.26982	-25.5007	0.52833121003731	1056.66242007462
KKR	2016-01-13 19:51:00	23.27748	-25.50775	1.10942141516898	1109.42141516898
KKR	2016-01-13 20:51:00	23.29223	-25.52798	2.71797961630324	2717.97961630324
KKR	2016-01-13 21:51:00	23.31705	-25.5287	2.5245182277932	2524.5182277932
KKR	2016-01-13 23:52:00	23.31178	-25.526	0.305085043535053	615.25483779569
KKR	2016-01-14 00:51:00	23.31078	-25.52445	0.204645443072095	201.234685687561
KKR	2016-01-14 01:51:00	23.30983	-25.52332	0.159240811662291	159.240811662291
KKR	2016-01-14 02:51:00	23.3043	-25.52107	0.61614659147607	616.14659147607
KKR	2016-01-14 03:51:00	23.2849	-25.51137	2.25209602388113	2252.09602388113
KKR	2016-01-14 04:51:00	23.27067	-25.5064	1.55043975402832	1550.43975402832
KKR	2016-01-14 05:51:00	23.26527	-25.50402	0.610462468805262	610.462468805262
KKR	2016-01-14 06:51:00	23.25338	-25.49542	1.54622707054255	1546.22707054255
KKR	2016-01-14 07:52:00	23.2468	-25.49002	0.88744690134318	902.237683032233
KKR	2016-01-14 08:51:00	23.24175	-25.48703	0.623657588363057	613.263295223672
KKR	2016-01-14 09:51:00	23.23945	-25.48673	0.236342619395075	236.342619395075
KKR	2016-01-14 10:53:00	23.23865	-25.48603	0.109379297162036	113.025273734104
KKR	2016-01-14 11:54:00	23.23765	-25.48582	0.102689618857739	104.401112505368
KKR	2016-01-14 12:51:00	23.23578	-25.48453	0.251482309791239	238.908194301677
KKR	2016-01-14 13:51:00	23.23563	-25.48443	0.0189307178793267	18.9307178793267
KKR	2016-01-14 14:51:00	23.2358	-25.48422	0.029203226900774	29.203226900774
KKR	2016-01-14 15:53:00	23.23665	-25.48343	0.119753188393927	123.744961340391
KKR	2016-01-14 16:52:00	23.237	-25.48335	0.0373345460833235	36.7123036486014
KKR	2016-01-14 17:52:00	23.23733	-25.485	0.187927113373029	187.927113373029
KKR	2016-01-14 18:51:00	23.23738	-25.4857	0.0799416045620862	78.6092444860515
KKR	2016-01-14 19:51:00	23.23912	-25.4854	0.180147970215008	180.147970215008
KKR	2016-01-14 20:51:00	23.24048	-25.48553	0.139096270510855	139.096270510855
KKR	2016-01-14 21:52:00	23.24063	-25.48588	0.0413950096989327	42.0849265272483
KKR	2016-01-14 23:51:00	23.24228	-25.48748	0.123826490070926	245.589205307337
KKR	2016-01-15 00:51:00	23.24272	-25.48865	0.138540222288693	138.540222288693
KKR	2016-01-15 01:51:00	23.2418	-25.49057	0.234626474015124	234.626474015124
KKR	2016-01-15 04:52:00	23.24198	-25.49073	0.0084945635187038	25.6252666147565
KKR	2016-01-15 05:51:00	23.24198	-25.49202	0.147010596237612	144.560419633651
KKR	2016-01-15 07:05:00	23.24275	-25.493	0.109365866887555	134.884569161318
KKR	2016-01-15 09:05:00	23.243	-25.49483	0.1033219363862	206.643872772399
KKR	2016-01-15 10:06:00	23.24322	-25.49492	0.0241408054901299	24.5431522482987
KKR	2016-01-15 13:04:00	23.24412	-25.49648	0.0665158460980394	197.330343424184
KKR	2016-01-15 14:03:00	23.24297	-25.49702	0.133918297490803	131.686325865956
KKR	2016-01-15 15:04:00	23.24283	-25.49793	0.101277717665299	102.965679626388
KKR	2016-01-15 16:05:00	23.24565	-25.49835	0.2858717590345	290.636288351741
KKR	2016-01-15 17:04:00	23.24778	-25.4987	0.223876842294951	220.145561590036
KKR	2016-01-15 18:04:00	23.25147	-25.49912	0.378213344075303	378.213344075303
KKR	2016-01-15 19:05:00	23.25673	-25.50232	0.633441455728757	643.998813324236
KKR	2016-01-15 20:03:00	23.26147	-25.50943	0.963302703285482	931.192613175966
KKR	2016-01-15 21:04:00	23.27323	-25.50847	1.18098556489522	1200.66865764347
KKR	2016-01-15 22:04:00	23.28225	-25.52262	1.8316910512331	1831.6910512331
KKR	2016-01-15 23:03:00	23.30092	-25.52797	2.0242705136602	1990.53267176587
KKR	2016-01-16 00:04:00	23.3172	-25.5288	1.6304609321268	1657.63528099558
KKR	2016-01-16 01:03:00	23.31255	-25.5268	0.532004306784876	523.137568338461
KKR	2016-01-16 02:04:00	23.30808	-25.52417	0.532729419334159	541.608242989729
KKR	2016-01-16 04:05:00	23.27728	-25.50753	1.80724088739609	3644.60245624879
KKR	2016-01-16 05:03:00	23.26942	-25.49602	1.56965504790416	1517.33321297402
KKR	2016-01-16 06:03:00	23.2631	-25.49338	0.707552448237818	707.552448237818
KKR	2016-01-16 07:03:00	23.25518	-25.48977	0.901369773363105	901.369773363105
KKR	2016-01-16 09:03:00	23.24702	-25.4897	0.414985861576269	829.971723152538
KKR	2016-01-16 11:03:00	23.24435	-25.48862	0.148656135325066	297.312270650132
KKR	2016-01-16 12:03:00	23.24245	-25.48822	0.198380873694166	198.380873694166
KKR	2016-01-16 13:03:00	23.24235	-25.48795	0.0319206235584479	31.9206235584479
KKR	2016-01-16 14:03:00	23.24175	-25.48733	0.0924747716253822	92.4747716253822
KKR	2016-01-16 15:04:00	23.2418	-25.48778	0.0498529963122939	50.6838795841654
KKR	2016-01-16 16:03:00	23.24023	-25.4863	0.234136019184839	230.233752198425
KKR	2016-01-16 17:03:00	23.23997	-25.48583	0.0589359710642184	58.9359710642184
KKR	2016-01-16 19:03:00	23.2416	-25.48397	0.133166860306383	266.333720612766
KKR	2016-01-16 20:03:00	23.2438	-25.48577	0.301265731084648	301.265731084648
KKR	2016-01-16 22:06:00	23.24373	-25.4858	0.00384082787826013	7.87369715043326
KKR	2016-01-16 23:04:00	23.24413	-25.48583	0.0422315137486008	40.8237966236474
KKR	2016-01-17 00:04:00	23.24453	-25.485	0.101520342268491	101.520342268491
KKR	2016-01-17 01:03:00	23.24475	-25.48488	0.0265492007640492	26.1067140846484
KKR	2016-01-17 02:03:00	23.2446	-25.48473	0.0227008310925817	22.7008310925817
KKR	2016-01-17 04:04:00	23.24482	-25.48388	0.0485184566120929	97.8455541677207
KKR	2016-01-17 05:03:00	23.24415	-25.48428	0.0829513397592235	81.5688174299031
KKR	2016-01-17 06:04:00	23.24397	-25.4864	0.234369314413371	238.275469653594
KKR	2016-01-17 07:03:00	23.24413	-25.48772	0.151336363943211	148.814091210824
KKR	2016-01-17 08:03:00	23.24468	-25.48782	0.0570524459054838	57.0524459054839
KKR	2016-01-17 09:04:00	23.24585	-25.4874	0.125873300703104	127.971189048156
KKR	2016-01-17 10:04:00	23.24668	-25.48703	0.0940527324412976	94.0527324412976
KKR	2016-01-17 11:03:00	23.24682	-25.48815	0.128454480565527	126.313572556102
KKR	2016-01-17 12:04:00	23.24877	-25.48828	0.195608287489208	198.868425614029
KKR	2016-01-17 13:04:00	23.24908	-25.48865	0.0520889807044163	52.0889807044163
KKR	2016-01-17 14:03:00	23.24962	-25.48888	0.0616979820223924	60.6696823220192
KKR	2016-01-17 15:03:00	23.25037	-25.48948	0.101683494232476	101.683494232476
KKR	2016-01-17 16:04:00	23.25148	-25.48332	0.687994108600238	699.460677076909
KKR	2016-01-17 17:04:00	23.26245	-25.48693	1.18683069552535	1186.83069552535
KKR	2016-01-17 18:03:00	23.26818	-25.49257	0.874241076806637	859.670392193193
KKR	2016-01-17 19:03:00	23.27018	-25.49435	0.284877012371601	284.877012371601
KKR	2016-01-17 21:04:00	23.27977	-25.50843	0.919728245518925	1854.78529512983
KKR	2016-01-17 22:03:00	23.30378	-25.52078	2.85372956962541	2806.16741013165
KKR	2016-01-17 23:03:00	23.31717	-25.52908	1.64859381592701	1648.59381592701
KKR	2016-01-18 00:04:00	23.31103	-25.52672	0.666771858271402	677.884722575925
KKR	2016-01-18 01:04:00	23.30875	-25.52573	0.256962781996696	256.962781996696
KKR	2016-01-18 02:03:00	23.30723	-25.52477	0.191468758081116	188.277612113098
KKR	2016-01-18 03:03:00	23.30547	-25.5227	0.292930735983236	292.930735983236
KKR	2016-01-18 04:03:00	23.29038	-25.51433	1.79815402506327	1798.15402506327
KKR	2016-01-18 05:03:00	23.27132	-25.50638	2.13299156612645	2132.99156612645
KKR	2016-01-18 06:03:00	23.26457	-25.50125	0.895327964617428	895.327964617428
KKR	2016-01-18 07:03:00	23.25188	-25.49525	1.45519148985146	1455.19148985146
KKR	2016-01-18 08:03:00	23.24468	-25.4932	0.767460855234132	767.460855234132
KKR	2016-01-18 09:03:00	23.24168	-25.49298	0.306114646504826	306.114646504826
KKR	2016-01-18 10:03:00	23.24095	-25.49258	0.0867284184096293	86.7284184096293
KKR	2016-01-18 11:03:00	23.24093	-25.49083	0.196120140546401	196.120140546401
KKR	2016-01-18 12:04:00	23.24543	-25.48595	0.701434157664081	713.124726958482
KKR	2016-01-18 13:06:00	23.2389	-25.48622	0.643427426849363	664.875007744342
KKR	2016-01-18 16:05:00	23.23745	-25.4859	0.0508767860783011	151.782411800265
KKR	2016-01-18 17:04:00	23.23783	-25.48588	0.0393725866752389	38.7163768973182
KKR	2016-01-18 18:03:00	23.23862	-25.48655	0.111837331614267	109.973376087363
KKR	2016-01-18 19:03:00	23.23943	-25.4835	0.351582455266573	351.582455266572
KKR	2016-01-18 20:04:00	23.24048	-25.48267	0.139304335028335	141.626073945474
KKR	2016-01-18 21:03:00	23.24153	-25.48332	0.13146756210311	129.276436068059
KKR	2016-01-18 22:03:00	23.243	-25.48392	0.163943513698856	163.943513698856
KKR	2016-01-18 23:04:00	23.2441	-25.48397	0.110189716106806	112.026211375253
KKR	2016-01-19 00:05:00	23.24828	-25.48705	0.538642234593213	547.619605169767
KKR	2016-01-19 01:03:00	23.24855	-25.48765	0.0751327928312854	72.6283664035759
KKR	2016-01-19 02:03:00	23.24888	-25.48768	0.0337322585872504	33.7322585872504
KKR	2016-01-19 03:04:00	23.2489	-25.48753	0.0166541423945071	16.9317114344156
KKR	2016-01-19 04:04:00	23.24898	-25.4877	0.0207152281810585	20.7152281810585
KKR	2016-01-19 05:04:00	23.25013	-25.49013	0.296364058061645	296.364058061645
KKR	2016-01-19 06:03:00	23.24982	-25.49127	0.133812076986392	131.581875703286
KKR	2016-01-19 07:03:00	23.25202	-25.49235	0.254386325241084	254.386325241084
KKR	2016-01-19 08:04:00	23.25442	-25.4926	0.241666120102112	245.69388877048
KKR	2016-01-19 09:04:00	23.25748	-25.49265	0.311264615230103	311.264615230103
KKR	2016-01-19 10:04:00	23.25943	-25.49315	0.206083703407999	206.083703407999
KKR	2016-01-19 11:05:00	23.25938	-25.49312	0.00599595102713689	6.09588354425583
KKR	2016-01-19 12:04:00	23.25965	-25.49395	0.0986203268215502	96.9766547078577
KKR	2016-01-19 13:04:00	23.26282	-25.49497	0.34205403810876	342.05403810876
KKR	2016-01-19 14:04:00	23.26297	-25.49487	0.0189283673830783	18.9283673830783
KKR	2016-01-19 15:04:00	23.26968	-25.4985	0.794427739397962	794.427739397962
KKR	2016-01-19 16:04:00	23.27065	-25.49888	0.107442219549947	107.442219549947
KKR	2016-01-19 17:04:00	23.27088	-25.49975	0.100253979330151	100.253979330151
KKR	2016-01-19 18:04:00	23.28043	-25.50882	1.40570357383847	1405.70357383847
KKR	2016-01-19 19:03:00	23.29667	-25.51727	1.9357083207044	1903.44651535933
KKR	2016-01-19 20:04:00	23.31487	-25.52827	2.18677225514064	2223.21845939298
KKR	2016-01-19 21:03:00	23.31708	-25.52865	0.232538977788212	228.663328158409
KKR	2016-01-19 22:03:00	23.31485	-25.52822	0.231760756378066	231.760756378066
KKR	2016-01-19 23:04:00	23.30603	-25.52598	0.915846493218434	931.110601438741
KKR	2016-01-20 00:05:00	23.30502	-25.52553	0.112515833347156	114.391097236275
KKR	2016-01-20 01:03:00	23.30377	-25.5255	0.131507551499969	127.12396644997
KKR	2016-01-20 02:03:00	23.30223	-25.52545	0.15666275191337	156.66275191337
KKR	2016-01-20 03:04:00	23.3007	-25.52445	0.188558171452994	191.700807643877
KKR	2016-01-20 04:03:00	23.29965	-25.5233	0.170163770778628	167.327707932317
KKR	2016-01-20 05:03:00	23.29738	-25.52057	0.383183542288393	383.183542288393
KKR	2016-01-20 06:03:00	23.28053	-25.50882	2.16069887545193	2160.69887545193
KKR	2016-01-20 07:03:00	23.26827	-25.49938	1.63499267407234	1634.99267407234
KKR	2016-01-20 08:03:00	23.2605	-25.49625	0.864531133123947	864.531133123947
KKR	2016-01-20 09:03:00	23.2474	-25.49177	1.42375791634078	1423.75791634078
KKR	2016-01-20 10:03:00	23.244	-25.4912	0.351655343670646	351.655343670646
KKR	2016-01-20 12:04:00	23.23785	-25.49172	0.311512618253575	628.217113478043
KKR	2016-01-20 14:45:00	23.23878	-25.47853	0.551977611149663	1481.1399232516
KKR	2016-01-20 17:33:00	23.2415	-25.49098	0.507982031064855	1422.34968698159
KKR	2016-01-20 18:32:00	23.24095	-25.49395	0.343214204279293	337.493967541305
KKR	2016-01-20 19:31:00	23.24298	-25.4978	0.486401905736444	478.295207307503
KKR	2016-01-20 20:32:00	23.24375	-25.49865	0.121289644513142	123.311138588361
KKR	2016-01-20 21:32:00	23.24433	-25.50073	0.240436256922484	240.436256922484
KKR	2016-01-20 22:31:00	23.2445	-25.50163	0.104060916610799	102.326568000619
KKR	2016-01-21 03:36:00	23.24693	-25.50368	0.0663755891302921	337.409244745652
KKR	2016-01-21 04:36:00	23.247	-25.50355	0.016214223971071	16.214223971071
KKR	2016-01-21 05:34:00	23.24817	-25.5042	0.144320375865389	139.509696669876
KKR	2016-01-21 06:34:00	23.24907	-25.50537	0.159896790714104	159.896790714104
KKR	2016-01-21 07:35:00	23.25225	-25.50488	0.322639735328633	328.017064250777
KKR	2016-01-21 08:35:00	23.2548	-25.49957	0.64908782301379	649.08782301379
KKR	2016-01-21 09:35:00	23.25985	-25.49605	0.647573696804371	647.573696804371
KKR	2016-01-21 13:35:00	23.2661	-25.49515	0.160893490035787	643.573960143146
KKR	2016-01-21 14:34:00	23.26602	-25.49545	0.0351734623875476	34.5872380144218
KKR	2016-01-21 15:35:00	23.2673	-25.49512	0.133106590587171	135.325033763623
KKR	2016-01-21 16:35:00	23.26798	-25.49585	0.10711545616527	107.11545616527
KKR	2016-01-21 17:34:00	23.26892	-25.49762	0.223904962454579	220.173213080336
KKR	2016-01-21 18:34:00	23.27063	-25.49942	0.266314110406018	266.314110406018
KKR	2016-01-21 19:34:00	23.27815	-25.50663	1.11242752111188	1112.42752111188
KKR	2016-01-21 20:35:00	23.29682	-25.51733	2.20845265493964	2245.26019918864
KKR	2016-01-21 21:35:00	23.31695	-25.52887	2.4207572346882	2420.7572346882
KKR	2016-01-21 22:34:00	23.31447	-25.52917	0.258653043935556	254.342159869963
KKR	2016-01-21 23:34:00	23.3126	-25.52947	0.193049363973907	193.049363973907
KKR	2016-01-22 00:35:00	23.30887	-25.52932	0.373336946826978	379.559229274095
KKR	2016-01-22 02:34:00	23.30342	-25.52292	0.456906720850873	906.198329687564
KKR	2016-01-22 03:34:00	23.30188	-25.52168	0.209324009296911	209.324009296911
KKR	2016-01-22 04:34:00	23.29058	-25.51448	1.4038477048085	1403.8477048085
KKR	2016-01-22 05:35:00	23.27125	-25.50393	2.25604684935835	2293.64763018099
KKR	2016-01-22 06:35:00	23.2718	-25.5019	0.234245114282128	234.245114282128
KKR	2016-01-22 07:35:00	23.26628	-25.49502	0.953661441356491	953.661441356491
KKR	2016-01-22 08:35:00	23.26275	-25.4915	0.533353648478845	533.353648478845
KKR	2016-01-22 09:34:00	23.26083	-25.49065	0.220945360314153	217.26293764225
KKR	2016-01-22 10:35:00	23.25985	-25.49143	0.130392719142699	132.565931128411
KKR	2016-01-22 11:34:00	23.25985	-25.4906	0.0945840853474338	93.0076839249765
KKR	2016-01-22 12:35:00	23.25935	-25.48922	0.160117546708394	162.786172486867
KKR	2016-01-22 13:34:00	23.25908	-25.48843	0.0942578715880645	92.6869070615967
KKR	2016-01-22 14:35:00	23.25842	-25.48578	0.299454859204731	304.445773524809
KKR	2016-01-22 16:35:00	23.25703	-25.4854	0.0738249707771883	147.649941554377
KKR	2016-01-22 17:35:00	23.2594	-25.48392	0.292594506774006	292.594506774006
KKR	2016-01-22 18:35:00	23.26028	-25.48325	0.116824749953797	116.824749953797
KKR	2016-01-22 19:34:00	23.26063	-25.4827	0.0723802742390721	71.1739363350875
KKR	2016-01-22 20:34:00	23.26153	-25.4812	0.191396261920452	191.396261920452
KKR	2016-01-22 21:35:00	23.26157	-25.48113	0.00869148303375592	8.83634108431852
KKR	2016-01-22 22:37:00	23.26262	-25.48135	0.106070584454431	109.606270602912
KKR	2016-01-22 23:34:00	23.26237	-25.48182	0.0615619607660056	58.4838627277054
KKR	2016-01-23 01:35:00	23.26273	-25.48243	0.0384516434675233	77.5441476595053
KKR	2016-01-23 02:35:00	23.26115	-25.48075	0.247520272076059	247.520272076059
KKR	2016-01-23 03:34:00	23.2616	-25.48175	0.123095980738473	121.044381059498
KKR	2016-01-23 05:35:00	23.26193	-25.4818	0.0168740533084757	34.0293408387592
KKR	2016-01-23 06:35:00	23.26153	-25.48272	0.110829992194198	110.829992194198
KKR	2016-01-23 07:34:00	23.25945	-25.4824	0.21821427451784	214.577369942543
KKR	2016-01-23 08:35:00	23.25233	-25.48075	0.735177854160795	747.430818396808
KKR	2016-01-23 09:34:00	23.24968	-25.4805	0.275591351865875	270.99816266811
KKR	2016-01-23 10:35:00	23.2498	-25.4802	0.0351790384665602	35.7653557743362
KKR	2016-01-23 13:42:00	23.24898	-25.48368	0.127953937328985	398.789771342003
KKR	2016-01-23 14:42:00	23.2481	-25.48478	0.152336008837738	152.336008837738
KKR	2016-01-23 15:42:00	23.24832	-25.48558	0.0923990179403564	92.3990179403564
KKR	2016-01-23 17:17:00	23.24675	-25.4869	0.13747606445854	217.670435392688
KKR	2016-01-23 18:16:00	23.24937	-25.48742	0.277402004772024	272.778638025824
KKR	2016-01-23 19:15:00	23.25212	-25.4876	0.285181018835421	280.428001854831
KKR	2016-01-23 20:15:00	23.2543	-25.48867	0.252068708717036	252.068708717036
KKR	2016-01-23 21:17:00	23.25513	-25.48902	0.090080766811952	93.0834590390171
KKR	2016-01-23 22:15:00	23.25533	-25.48937	0.0457052397871274	44.1817317942232
KKR	2016-01-24 00:16:00	23.255	-25.48932	0.0168732718256055	34.0277648483045
KKR	2016-01-24 01:15:00	23.25687	-25.48965	0.197037098989611	193.753147339784
KKR	2016-01-24 02:15:00	23.2592	-25.49208	0.360976106268443	360.976106268443
KKR	2016-01-24 04:16:00	23.2588	-25.49275	0.0423430878425819	85.3918938158735
KKR	2016-01-24 05:15:00	23.25868	-25.4919	0.0976553762807809	96.0277866761012
KKR	2016-01-24 06:15:00	23.25812	-25.4931	0.14603346490243	146.03346490243
KKR	2016-01-24 07:21:00	23.25857	-25.49433	0.132027923894312	145.230716283743
KKR	2016-01-24 08:20:00	23.26055	-25.49578	0.26313233148145	258.746792623426
KKR	2016-01-24 09:20:00	23.262	-25.49638	0.162068593788198	162.068593788198
KKR	2016-01-24 10:20:00	23.26415	-25.49672	0.221946970929859	221.946970929859
KKR	2016-01-24 11:20:00	23.26497	-25.49715	0.0963120642129506	96.3120642129506
KKR	2016-01-24 13:21:00	23.2659	-25.49782	0.0598784428987861	120.754859845885
KKR	2016-01-24 14:20:00	23.26782	-25.49913	0.248421534864986	244.281175950569
KKR	2016-01-24 15:20:00	23.2677	-25.50095	0.204305290294015	204.305290294015
KKR	2016-01-24 16:22:00	23.2698	-25.50138	0.211862389790425	218.924469450106
KKR	2016-01-24 18:22:00	23.28823	-25.5131	1.14419764291822	2288.39528583645
KKR	2016-01-24 19:20:00	23.3058	-25.52187	2.10912066718136	2038.81664494198
KKR	2016-01-24 20:20:00	23.31715	-25.52908	1.40854169733319	1408.54169733319
KKR	2016-01-24 21:20:00	23.31612	-25.52612	0.347780484689989	347.780484689989
KKR	2016-01-24 22:20:00	23.31232	-25.52128	0.665819179571197	665.819179571197
KKR	2016-01-24 23:21:00	23.31053	-25.5198	0.242165406485524	246.201496593616
KKR	2016-01-25 00:20:00	23.30837	-25.51913	0.23601203828616	232.078504314724
KKR	2016-01-25 01:20:00	23.30673	-25.52028	0.210720662821564	210.720662821564
KKR	2016-01-25 02:20:00	23.30395	-25.51753	0.418121247160161	418.121247160161
KKR	2016-01-25 03:21:00	23.2907	-25.51462	1.36334780355267	1386.07026694521
KKR	2016-01-25 04:20:00	23.28058	-25.50885	1.23585401607981	1215.25644914514
KKR	2016-01-25 05:20:00	23.27343	-25.50672	0.76522541766694	765.22541766694
KKR	2016-01-25 06:20:00	23.26843	-25.49767	1.13442222478098	1134.42222478098
KKR	2016-01-25 07:20:00	23.26703	-25.49083	0.779570325147576	779.570325147576
KKR	2016-01-25 08:20:00	23.26167	-25.48682	0.706462100974738	706.462100974738
KKR	2016-01-25 09:21:00	23.25962	-25.48538	0.259327372298533	263.649495170176
KKR	2016-01-25 10:21:00	23.2577	-25.48463	0.212599914222586	212.599914222586
KKR	2016-01-25 11:20:00	23.25743	-25.48435	0.042403540461438	41.6968147870807
KKR	2016-01-25 12:23:00	23.25703	-25.48235	0.216932695117086	227.77932987294
KKR	2016-01-25 15:01:00	23.25607	-25.48263	0.0389473646905692	102.561393685166
KKR	2016-01-25 15:59:00	23.25492	-25.4831	0.132703260786537	128.279818760319
KKR	2016-01-25 16:59:00	23.25397	-25.48335	0.100606020880753	100.606020880753
KKR	2016-01-25 18:59:00	23.25475	-25.48123	0.125231228072256	250.462456144512
KKR	2016-01-25 19:59:00	23.25663	-25.48295	0.271503953779204	271.503953779204
KKR	2016-01-25 21:00:00	23.25835	-25.48485	0.271047365007004	275.564821090454
KKR	2016-01-25 22:02:00	23.25827	-25.48633	0.160688895589049	166.045192108684
KKR	2016-01-25 23:00:00	23.25925	-25.48663	0.108818111811142	105.190841417437
KKR	2016-01-25 23:59:00	23.26008	-25.48857	0.237159346115586	233.206690346993
KKR	2016-01-26 02:26:00	23.26172	-25.49128	0.141415160708616	346.467143736109
KKR	2016-01-26 03:26:00	23.26212	-25.49307	0.204665624957107	204.665624957107
KKR	2016-01-26 04:27:00	23.26207	-25.49312	0.0074423402995553	7.56637930454789
KKR	2016-01-26 05:25:00	23.26197	-25.4931	0.0107733210272105	10.4142103263035
KKR	2016-01-26 06:25:00	23.26413	-25.49478	0.289303934258386	289.303934258386
KKR	2016-01-26 07:25:00	23.26497	-25.49543	0.112263330257541	112.263330257541
KKR	2016-01-26 08:25:00	23.26557	-25.49683	0.168327488841252	168.327488841252
KKR	2016-01-26 09:26:00	23.26703	-25.49825	0.214066184641991	217.633954386024
KKR	2016-01-26 11:01:00	23.2669	-25.49815	0.0109455902588435	17.3305179098355
KKR	2016-01-26 11:26:00	23.26707	-25.49825	0.049445405614941	20.6022523395587
KKR	2016-01-26 13:28:00	23.27042	-25.50008	0.195557143855351	397.632859172546
KKR	2016-01-26 15:25:00	23.27128	-25.50185	0.111160072162983	216.762140717817
KKR	2016-01-26 16:25:00	23.28395	-25.51095	1.6430587037114	1643.0587037114
KKR	2016-01-26 17:25:00	23.29522	-25.51652	1.3048432022814	1304.8432022814
KKR	2016-01-26 18:25:00	23.30518	-25.5214	1.1508287193297	1150.8287193297
KKR	2016-01-26 19:25:00	23.31155	-25.52607	0.832569824543251	832.569824543251
KKR	2016-01-26 20:25:00	23.31725	-25.52875	0.652638569478573	652.638569478573
KKR	2016-01-26 21:25:00	23.31417	-25.52322	0.694215242907651	694.215242907651
KKR	2016-01-26 22:25:00	23.31132	-25.52153	0.346129168825253	346.129168825253
KKR	2016-01-26 23:24:00	23.30748	-25.52085	0.404504703265766	397.762958211337
KKR	2016-01-27 00:24:00	23.30498	-25.51968	0.285984535458734	285.984535458734
KKR	2016-01-27 01:24:00	23.29878	-25.51512	0.811421036243814	811.421036243814
KKR	2016-01-27 02:24:00	23.29057	-25.51352	0.853791418455293	853.791418455293
KKR	2016-01-27 03:24:00	23.28035	-25.50735	1.24814528244599	1248.14528244599
KKR	2016-01-27 04:24:00	23.2729	-25.50062	1.06893516998425	1068.93516998425
KKR	2016-01-27 05:24:00	23.2653	-25.4924	1.20240728364958	1202.40728364958
KKR	2016-01-27 06:24:00	23.2626	-25.49197	0.278791872615387	278.791872615387
KKR	2016-01-27 07:24:00	23.25775	-25.48963	0.558630907547833	558.630907547833
KKR	2016-01-27 08:24:00	23.2488	-25.4875	0.941060678881082	941.060678881082
KKR	2016-01-27 10:24:00	23.24463	-25.4868	0.215663883081254	431.327766162508
KKR	2016-01-27 11:24:00	23.24193	-25.48583	0.295354082671301	295.354082671301
KKR	2016-01-27 13:24:00	23.24048	-25.48695	0.0968301101383215	193.660220276643
KKR	2016-01-27 15:24:00	23.24008	-25.4829	0.227837274932726	455.674549865452
KKR	2016-01-27 16:52:00	23.24165	-25.48233	0.117269761956198	171.99565086909
KKR	2016-01-27 17:51:00	23.24452	-25.48322	0.313719718087178	308.491056119058
KKR	2016-01-27 18:52:00	23.24868	-25.48323	0.416196811315748	423.133424837677
KKR	2016-01-27 19:52:00	23.24997	-25.48387	0.14953167149088	149.53167149088
KKR	2016-01-27 22:15:00	23.25173	-25.48368	0.0756404400290544	180.276382069246
KKR	2016-01-27 23:13:00	23.25237	-25.48362	0.0676990632526566	65.4424278109014
KKR	2016-01-28 00:14:00	23.25295	-25.47718	0.712200498552033	724.070506861234
KKR	2016-01-28 01:13:00	23.25307	-25.47163	0.632592898393628	622.049683420401
KKR	2016-01-28 02:13:00	23.23908	-25.46985	1.43704791471035	1437.04791471035
KKR	2016-01-28 03:13:00	23.23708	-25.4698	0.203533295089595	203.533295089595
KKR	2016-01-28 04:16:00	23.2371	-25.4701	0.0320768183135942	33.6806592292739
KKR	2016-01-28 06:13:00	23.2351	-25.47117	0.121108522710071	236.161619284639
KKR	2016-01-28 07:14:00	23.2352	-25.47455	0.372702370654551	378.914076832127
KKR	2016-01-28 08:13:00	23.23532	-25.47938	0.55058455086925	541.408141688096
KKR	2016-01-28 09:14:00	23.23508	-25.48055	0.131182232217068	133.368602754019
KKR	2016-01-28 10:14:00	23.23513	-25.48068	0.0154306271270082	15.4306271270082
KKR	2016-01-28 12:14:00	23.23755	-25.48342	0.196771716230905	393.54343246181
KKR	2016-01-28 13:13:00	23.23888	-25.48513	0.238544739940196	234.568994274526
KKR	2016-01-28 15:14:00	23.23747	-25.48593	0.083867389968427	169.132569769661
KKR	2016-01-28 16:13:00	23.2391	-25.48603	0.16898876401504	166.17228461479
KKR	2016-01-28 18:13:00	23.25368	-25.49255	0.826572203975882	1653.14440795176
KKR	2016-01-28 19:14:00	23.26088	-25.49815	0.948544274596071	964.353345839339
KKR	2016-01-28 20:13:00	23.26783	-25.50082	0.780512660053535	767.504115719309
KKR	2016-01-28 21:14:00	23.28195	-25.51012	1.74506091904057	1774.14526769125
KKR	2016-01-28 22:13:00	23.3033	-25.52023	2.49007242642116	2448.57121931414
KKR	2016-01-28 23:13:00	23.31693	-25.52902	1.7000073572391	1700.0073572391
KKR	2016-01-29 00:13:00	23.31697	-25.52825	0.0863678210354174	86.3678210354174
KKR	2016-01-29 01:13:00	23.315	-25.52638	0.28983694371022	289.83694371022
KKR	2016-01-29 02:13:00	23.31285	-25.52427	0.321967770201233	321.967770201233
KKR	2016-01-29 03:13:00	23.30922	-25.52228	0.431166315841544	431.166315841544
KKR	2016-01-29 04:13:00	23.30447	-25.51898	0.608213454705438	608.213454705438
KKR	2016-01-29 05:13:00	23.30263	-25.51985	0.210945120361361	210.945120361361
KKR	2016-01-29 06:13:00	23.28902	-25.51327	1.56793038957602	1567.93038957602
KKR	2016-01-29 07:13:00	23.27023	-25.4994	2.46295207480225	2462.95207480225
KKR	2016-01-29 08:13:00	23.25928	-25.49492	1.22151627742892	1221.51627742892
KKR	2016-01-29 09:13:00	23.23027	-25.49227	2.96539565761396	2965.39565761396
KKR	2016-01-29 10:13:00	23.23877	-25.48608	1.10844233865835	1108.44233865835
KKR	2016-01-29 11:13:00	23.24378	-25.48362	0.579376284459732	579.376284459732
KKR	2016-01-29 12:13:00	23.24362	-25.4836	0.0164279698940317	16.4279698940317
KKR	2016-01-29 13:15:00	23.2467	-25.48418	0.309629965945555	319.950964810407
KKR	2016-01-29 14:13:00	23.24682	-25.48423	0.0138933555921521	13.4302437390804
KKR	2016-01-29 15:14:00	23.24827	-25.48737	0.37527432957116	381.528901730679
KKR	2016-01-29 16:14:00	23.25368	-25.48643	0.560243630032483	560.243630032483
KKR	2016-01-29 17:13:00	23.25677	-25.48685	0.323172513005228	317.786304455141
KKR	2016-01-29 18:13:00	23.26365	-25.48828	0.717859427365954	717.859427365954
KKR	2016-01-29 19:13:00	23.2695	-25.49	0.625409356666494	625.409356666494
KKR	2016-01-29 20:13:00	23.2739	-25.49352	0.59650417720119	596.50417720119
KKR	2016-01-29 21:13:00	23.27562	-25.49973	0.71749900653779	717.49900653779
KKR	2016-01-29 22:13:00	23.27842	-25.50672	0.83339629744747	833.39629744747
KKR	2016-01-29 23:13:00	23.2909	-25.51408	1.51342033478128	1513.42033478128
KKR	2016-01-30 00:13:00	23.30357	-25.52043	1.47162015788186	1471.62015788186
KKR	2016-01-30 01:14:00	23.31708	-25.52862	1.62472858780891	1651.80739760572
KKR	2016-01-30 02:13:00	23.3152	-25.52425	0.534510718811284	525.602206831096
KKR	2016-01-30 03:13:00	23.31033	-25.51987	0.69711066829893	697.11066829893
KKR	2016-01-30 04:13:00	23.3002	-25.51008	1.50466394322298	1504.66394322298
KKR	2016-01-30 05:13:00	23.28065	-25.50897	1.99174792877508	1991.74792877508
KKR	2016-01-30 06:14:00	23.26617	-25.49968	1.77370983734452	1803.27166796693
KKR	2016-01-30 07:13:00	23.26235	-25.49843	0.419959980626116	412.96064761568
KKR	2016-01-30 08:13:00	23.26103	-25.48985	0.970775435555044	970.775435555044
KKR	2016-01-30 09:13:00	23.24315	-25.48462	1.9106720147471	1910.6720147471
KKR	2016-01-30 10:13:00	23.23887	-25.48603	0.463124127335601	463.124127335601
KKR	2016-01-30 11:13:00	23.23728	-25.48593	0.162113298247616	162.113298247616
KKR	2016-01-30 12:14:00	23.23722	-25.4859	0.00685337366617859	6.9675965606149
KKR	2016-01-30 13:14:00	23.23733	-25.48605	0.0201927040830417	20.1927040830417
KKR	2016-01-30 14:14:00	23.23902	-25.48625	0.173351609251586	173.351609251586
KKR	2016-01-30 15:14:00	23.23898	-25.48617	0.00984506546626904	9.84506546626904
KKR	2016-01-30 17:13:00	23.23943	-25.48697	0.0507523500314027	100.658827562282
KKR	2016-01-30 18:13:00	23.24432	-25.48892	0.543256798928021	543.256798928021
KKR	2016-01-30 20:13:00	23.25183	-25.49178	0.414169883044514	828.339766089029
KKR	2016-01-30 21:16:00	23.25183	-25.49172	0.00640340799695898	6.72357839680693
KKR	2016-01-30 22:13:00	23.25232	-25.49577	0.480599080568234	456.569126539822
KKR	2016-01-30 23:14:00	23.25367	-25.49845	0.324801211002034	330.214564518735
KKR	2016-01-31 00:13:00	23.2578	-25.5018	0.572869549943352	563.321724110963
KKR	2016-01-31 01:13:00	23.25965	-25.50163	0.189098575755562	189.098575755562
KKR	2016-01-31 02:13:00	23.2598	-25.50202	0.0462881346674018	46.2881346674018
KKR	2016-01-31 03:14:00	23.26088	-25.5019	0.108836593928985	110.650537161135
KKR	2016-01-31 05:13:00	23.25982	-25.50318	0.0904660288202733	179.424290493542
KKR	2016-01-31 06:13:00	23.26223	-25.50178	0.29099313877587	290.99313877587
KKR	2016-01-31 07:13:00	23.23728	-25.4859	3.0993092847891	3099.3092847891
KKR	2016-01-31 08:13:00	23.23643	-25.4841	0.219462658337111	219.462658337111
KKR	2016-01-31 09:14:00	23.23712	-25.48453	0.0837384921498901	85.1341336857216
KKR	2016-01-31 11:14:00	23.2374	-25.4858	0.0725712648506045	145.142529701209
KKR	2016-01-31 12:15:00	23.23747	-25.4859	0.0130592841272677	13.2769388627221
KKR	2016-01-31 14:15:00	23.2375	-25.48592	0.00189304857532459	3.78609715064917
KKR	2016-01-31 15:13:00	23.23887	-25.4862	0.147762749355532	142.837324377014
KKR	2016-01-31 16:14:00	23.23897	-25.48615	0.0114222234141495	11.6125938043853
KKR	2016-01-31 17:13:00	23.24043	-25.48603	0.151636845126762	149.10956437465
KKR	2016-01-31 18:13:00	23.24672	-25.48722	0.653520292286616	653.520292286616
KKR	2016-01-31 19:14:00	23.25633	-25.48978	1.00194991891457	1018.64908422981
KKR	2016-01-31 20:14:00	23.27157	-25.49507	1.6594284867649	1659.4284867649
KKR	2016-01-31 21:13:00	23.27983	-25.50843	1.7456735310805	1716.57897222916
KKR	2016-01-31 22:13:00	23.3038	-25.52097	2.81320047594295	2813.20047594295
KKR	2016-01-31 23:13:00	23.31723	-25.52883	1.62471157702236	1624.71157702236
KKR	2016-02-01 00:13:00	23.3159	-25.5263	0.31405964976153	314.05964976153
KKR	2016-02-01 01:13:00	23.3123	-25.51942	0.853323135059758	853.323135059758
KKR	2016-02-01 02:14:00	23.30833	-25.51625	0.528833312701685	537.647201246713
KKR	2016-02-01 03:13:00	23.30127	-25.50865	1.13260722796453	1113.73044083179
KKR	2016-02-01 04:13:00	23.28905	-25.48542	2.88428983243925	2884.28983243925
KKR	2016-02-01 05:13:00	23.27037	-25.46407	3.05502753604262	3055.02753604262
KKR	2016-02-01 06:13:00	23.25417	-25.46392	1.64806447548089	1648.06447548089
KKR	2016-02-01 07:13:00	23.24672	-25.46358	0.758847325513722	758.847325513722
KKR	2016-02-01 08:13:00	23.23255	-25.46713	1.4954230191139	1495.4230191139
KKR	2016-02-01 09:13:00	23.22257	-25.47992	1.75645868865638	1756.45868865638
KKR	2016-02-01 10:13:00	23.21937	-25.48452	0.609680715849375	609.680715849375
KKR	2016-02-01 11:13:00	23.22002	-25.48753	0.343744706417969	343.744706417969
KKR	2016-02-01 13:14:00	23.22155	-25.48813	0.0840653720605761	169.531833655495
KKR	2016-02-01 15:14:00	23.22172	-25.4884	0.0174253600187172	34.8507200374344
KKR	2016-02-01 16:13:00	23.22337	-25.48888	0.179228052305809	176.240918100713
KKR	2016-02-01 17:13:00	23.23072	-25.48973	0.753642354004765	753.642354004765
KKR	2016-02-01 18:14:00	23.23895	-25.49152	0.846669466232713	860.780624003258
KKR	2016-02-01 19:13:00	23.23642	-25.49513	0.487578293513826	479.451988621929
KKR	2016-02-01 20:13:00	23.23918	-25.49818	0.442287894930676	442.287894930676
KKR	2016-02-01 21:13:00	23.24107	-25.50497	0.784808437641858	784.808437641858
KKR	2016-02-01 22:13:00	23.24575	-25.5038	0.493670946691948	493.670946691948
KKR	2016-02-01 23:13:00	23.24937	-25.50353	0.36938273903312	369.38273903312
KKR	2016-02-02 00:14:00	23.25493	-25.51017	0.919204904947324	934.524986696446
KKR	2016-02-02 01:13:00	23.25542	-25.51173	0.184854903314232	181.773988258995
KKR	2016-02-02 02:13:00	23.25727	-25.5128	0.223082993541814	223.082993541814
KKR	2016-02-02 03:13:00	23.25987	-25.51827	0.667539827516426	667.539827516426
KKR	2016-02-02 04:13:00	23.26493	-25.5281	1.21574131596152	1215.74131596152
KKR	2016-02-02 05:14:00	23.28353	-25.52798	1.86008779379677	1891.08925702671
KKR	2016-02-02 06:13:00	23.30088	-25.52582	1.81059857389959	1780.42193100127
KKR	2016-02-02 07:13:00	23.31043	-25.52532	0.972499071711217	972.499071711217
KKR	2016-02-02 08:13:00	23.31717	-25.52865	0.780184651754213	780.184651754213
KKR	2016-02-02 10:13:00	23.27253	-25.50152	2.73135304425336	5462.70608850672
KKR	2016-02-02 12:13:00	23.2432	-25.48653	1.71168183622804	3423.36367245609
KKR	2016-02-02 16:14:00	23.2372	-25.48523	0.156206483098787	627.429373780128
KKR	2016-02-02 17:14:00	23.23867	-25.48487	0.154867965772392	154.867965772392
KKR	2016-02-02 18:13:00	23.24072	-25.4838	0.244611163936893	240.534311204612
KKR	2016-02-02 19:13:00	23.2418	-25.48575	0.244579736017245	244.579736017245
KKR	2016-02-02 20:13:00	23.24462	-25.49128	0.682861550296661	682.861550296661
KKR	2016-02-02 21:13:00	23.25453	-25.50367	1.71566609925624	1715.66609925624
KKR	2016-02-02 22:14:00	23.25783	-25.51123	0.896268119160014	911.205921146014
KKR	2016-02-02 23:13:00	23.25877	-25.51072	0.113255462284596	111.367871246519
KKR	2016-02-03 00:13:00	23.26147	-25.51008	0.283768534468275	283.768534468275
KKR	2016-02-03 01:13:00	23.26172	-25.50968	0.0515301057305978	51.5301057305978
KKR	2016-02-03 03:14:00	23.26437	-25.50957	0.133762212954877	269.753796125668
KKR	2016-02-03 04:13:00	23.27032	-25.50908	0.617819461753295	607.522470724074
KKR	2016-02-03 05:13:00	23.27493	-25.50688	0.529642864328044	529.642864328044
KKR	2016-02-03 06:13:00	23.27043	-25.50542	0.485962230012052	485.962230012052
KKR	2016-02-03 07:13:00	23.2702	-25.50297	0.275528011594329	275.528011594329
KKR	2016-02-03 08:13:00	23.2707	-25.50253	0.0708249892439154	70.8249892439154
KKR	2016-02-03 09:13:00	23.2672	-25.50153	0.373146585745094	373.146585745094
KKR	2016-02-03 10:13:00	23.26415	-25.49998	0.355487588675293	355.487588675293
KKR	2016-02-03 11:13:00	23.2653	-25.49793	0.257772059609707	257.772059609707
KKR	2016-02-03 15:45:00	23.26935	-25.49967	0.100519305671951	455.687519046178
KKR	2016-02-03 16:43:00	23.26973	-25.50178	0.247833795555563	239.572669037044
KKR	2016-02-03 17:44:00	23.27518	-25.5067	0.768904792089594	781.719871957754
KKR	2016-02-03 21:36:00	23.31935	-25.5254	1.28163618111141	4955.65990029744
KKR	2016-02-03 22:34:00	23.31987	-25.52408	0.162473698694511	157.057908738027
KKR	2016-02-03 23:33:00	23.31752	-25.51872	0.657272586272986	646.318043168436
KKR	2016-02-04 00:35:00	23.31563	-25.52343	0.543492833566615	561.609261352169
KKR	2016-02-04 01:34:00	23.3126	-25.52653	0.472114901368533	464.246319679058
KKR	2016-02-04 02:34:00	23.30503	-25.5203	1.03900582750511	1039.00582750511
KKR	2016-02-04 03:33:00	23.30308	-25.51795	0.335184933248665	329.598517694521
KKR	2016-02-04 04:33:00	23.29262	-25.5152	1.10723692261905	1107.23692261905
KKR	2016-02-04 05:34:00	23.27458	-25.50147	2.35486436510976	2394.11210452826
KKR	2016-02-04 06:34:00	23.26528	-25.49307	1.33434018225252	1334.34018225252
KKR	2016-02-04 07:34:00	23.25182	-25.49043	1.4005376072262	1400.5376072262
KKR	2016-02-04 08:34:00	23.23725	-25.48582	1.56938883523594	1569.38883523594
KKR	2016-02-04 09:46:00	23.23548	-25.48552	0.152622790230887	183.147348277064
KKR	2016-02-04 10:34:00	23.23513	-25.48572	0.0525850080718551	42.0680064574841
KKR	2016-02-04 11:35:00	23.2357	-25.4859	0.0603800280637511	61.3863618648136
KKR	2016-02-04 12:36:00	23.23587	-25.48567	0.0305288122472876	31.0376257847424
KKR	2016-02-04 13:34:00	23.23578	-25.48587	0.0250450856390417	24.2102494510736
KKR	2016-02-04 14:35:00	23.23545	-25.48565	0.0409645512677813	41.6472937889109
KKR	2016-02-04 15:34:00	23.23555	-25.48395	0.194013993395239	190.780426838652
KKR	2016-02-04 16:34:00	23.23272	-25.48235	0.339136361979513	339.136361979513
KKR	2016-02-04 17:33:00	23.23187	-25.48368	0.175229141243876	172.308655556478
KKR	2016-02-04 18:33:00	23.23293	-25.48658	0.342406991316424	342.406991316424
KKR	2016-02-04 19:34:00	23.23427	-25.4979	1.25495603962381	1275.87197361754
KKR	2016-02-04 20:33:00	23.23043	-25.51313	1.78053169543462	1750.85616717737
KKR	2016-02-04 21:34:00	23.23478	-25.51398	0.44508064337474	452.498654097652
KKR	2016-02-04 22:34:00	23.24233	-25.51283	0.778503178171308	778.503178171308
KKR	2016-02-04 23:34:00	23.25283	-25.51138	1.08003013417358	1080.03013417358
KKR	2016-02-05 00:34:00	23.25515	-25.51088	0.24247946257257	242.47946257257
KKR	2016-02-05 01:33:00	23.25448	-25.51098	0.070216952111266	69.0466695760782
KKR	2016-02-05 02:34:00	23.25477	-25.51063	0.0482658726318396	49.0703038423703
KKR	2016-02-05 03:34:00	23.25592	-25.51162	0.161190944415495	161.190944415495
KKR	2016-02-05 04:33:00	23.25875	-25.51045	0.321594796187407	316.234882917617
KKR	2016-02-05 05:34:00	23.26065	-25.50933	0.226615038200491	230.391955503832
KKR	2016-02-05 06:33:00	23.26092	-25.5086	0.0877488653834931	86.2863842937682
KKR	2016-02-05 07:34:00	23.26263	-25.50705	0.241744985517178	245.774068609131
KKR	2016-02-05 08:33:00	23.26582	-25.50265	0.600196353860095	590.19308129576
KKR	2016-02-05 11:30:00	23.26668	-25.5019	0.0411156869694839	121.291276559978
KKR	2016-02-05 17:29:00	23.26998	-25.50058	0.0612934938663935	366.739404967255
KKR	2016-02-05 18:27:00	23.27997	-25.50862	1.4046248929911	1357.80406322473
KKR	2016-02-05 19:28:00	23.29378	-25.51778	1.71078973838846	1739.30290069494
KKR	2016-02-05 20:28:00	23.31698	-25.52885	2.66488065511171	2664.88065511171
KKR	2016-02-05 21:26:00	23.31705	-25.52873	0.0157365803971588	15.2120277172535
KKR	2016-02-05 22:38:00	23.31707	-25.52318	0.51819519143818	621.834229725816
KKR	2016-02-05 23:38:00	23.31463	-25.52107	0.342669654988534	342.669654988534
KKR	2016-02-06 00:38:00	23.31228	-25.51555	0.663018845193253	663.018845193253
KKR	2016-02-06 01:37:00	23.30905	-25.51483	0.3438921587042	338.160622725797
KKR	2016-02-06 02:38:00	23.30092	-25.50628	1.24458303845547	1265.3260890964
KKR	2016-02-06 03:38:00	23.29642	-25.4874	2.16437147558172	2164.37147558172
KKR	2016-02-06 06:14:00	23.30388	-25.419	2.96210606110612	7701.4757588759
KKR	2016-02-06 07:13:00	23.28893	-25.41472	1.62213289396123	1595.09734572854
KKR	2016-02-06 08:12:00	23.28123	-25.39802	2.06309870095024	2028.71372260107
KKR	2016-02-06 09:14:00	23.28297	-25.38937	0.953513774098996	985.297566568962
KKR	2016-02-06 10:13:00	23.28318	-25.38605	0.37894139709641	372.625707144803
KKR	2016-02-06 11:13:00	23.27888	-25.38293	0.560182391749505	560.182391749505
KKR	2016-02-06 12:13:00	23.2777	-25.38188	0.168139124246993	168.139124246993
KKR	2016-02-06 13:14:00	23.2778	-25.3818	0.0133414922549897	13.5638504592395
KKR	2016-02-06 14:15:00	23.278	-25.38208	0.0367882609200648	37.4013986020659
KKR	2016-02-06 15:12:00	23.2783	-25.38192	0.0372757480771827	35.4119606733235
KKR	2016-02-06 16:14:00	23.27475	-25.38507	0.488849857941026	505.144853205727
KKR	2016-02-06 17:13:00	23.27355	-25.38648	0.203093318797744	199.708430151115
KKR	2016-02-06 18:13:00	23.26962	-25.39048	0.600772804293073	600.772804293073
KKR	2016-02-06 19:13:00	23.26625	-25.3963	0.736873665526797	736.873665526797
KKR	2016-02-06 20:13:00	23.27613	-25.40287	1.2462752447561	1246.2752447561
KKR	2016-02-06 21:12:00	23.2933	-25.40815	1.87612963545708	1844.86080819946
KKR	2016-02-07 00:06:00	23.30673	-25.42913	0.937625678178446	2719.11446671749
KKR	2016-02-07 01:04:00	23.30832	-25.4368	0.904631720730565	874.477330039546
KKR	2016-02-07 02:05:00	23.30827	-25.44482	0.883880619634353	898.611963294926
KKR	2016-02-07 03:04:00	23.3052	-25.45948	1.70034255276779	1672.00351022166
KKR	2016-02-07 04:05:00	23.29815	-25.48182	2.56111058699835	2603.79576344833
KKR	2016-02-07 06:05:00	23.29758	-25.51777	2.01425351166378	4028.50702332755
KKR	2016-02-07 07:05:00	23.30547	-25.52387	1.05385523619388	1053.85523619388
KKR	2016-02-07 08:04:00	23.31703	-25.52888	1.32445717180347	1302.38288560675
KKR	2016-02-07 09:05:00	23.29638	-25.54045	2.42675559731867	2467.20152394065
KKR	2016-02-07 10:04:00	23.27375	-25.55257	2.71658392786281	2671.30752906509
KKR	2016-02-07 11:05:00	23.27222	-25.56618	1.50782441994736	1532.95482694648
KKR	2016-02-07 12:05:00	23.26888	-25.56897	0.461490056018238	461.490056018238
KKR	2016-02-07 13:05:00	23.26392	-25.5712	0.562641525741875	562.641525741875
KKR	2016-02-07 14:04:00	23.25562	-25.5709	0.858551921670513	844.242722976004
KKR	2016-02-07 15:05:00	23.254	-25.5685	0.310170419558869	315.339926551516
KKR	2016-02-07 16:04:00	23.25295	-25.56805	0.120035519310821	118.034927322307
KKR	2016-02-07 17:06:00	23.25117	-25.56538	0.33836609172503	349.644961449198
KKR	2016-02-07 18:05:00	23.2512	-25.56507	0.0354630003850801	34.8719503786621
KKR	2016-02-07 19:05:00	23.25318	-25.56553	0.207748099528305	207.748099528305
KKR	2016-02-07 20:04:00	23.25563	-25.5661	0.261439402575904	257.082079199639
KKR	2016-02-07 21:05:00	23.25828	-25.56705	0.284872110085526	289.619978586952
KKR	2016-02-07 22:05:00	23.2651	-25.56812	0.703463457024939	703.463457024939
KKR	2016-02-07 23:04:00	23.27643	-25.56818	1.17106307797693	1151.54536001065
KKR	2016-02-08 00:04:00	23.27077	-25.55893	1.18543434013189	1185.43434013189
KKR	2016-02-08 01:04:00	23.26643	-25.5427	1.87139009078267	1871.39009078267
KKR	2016-02-08 02:05:00	23.26155	-25.52372	2.14812250014417	2183.92454181324
KKR	2016-02-08 03:05:00	23.25818	-25.51087	1.48014725825445	1480.14725825445
KKR	2016-02-08 04:04:00	23.25717	-25.50838	0.302365816606973	297.32638633019
KKR	2016-02-08 05:04:00	23.25715	-25.50695	0.160255940080715	160.255940080715
KKR	2016-02-08 06:05:00	23.25673	-25.50392	0.336601940712233	342.211973057437
KKR	2016-02-08 07:04:00	23.25463	-25.50055	0.441194434535049	433.841193959464
KKR	2016-02-08 08:04:00	23.25202	-25.49757	0.426578266701926	426.578266701926
KKR	2016-02-08 09:05:00	23.24973	-25.49475	0.386124236513051	392.559640454935
KKR	2016-02-08 10:06:00	23.24932	-25.49362	0.131131601849676	133.317128547171
KKR	2016-02-08 11:05:00	23.24942	-25.49223	0.158741197884547	156.095511253138
KKR	2016-02-08 13:05:00	23.24342	-25.48648	0.443734183402034	887.468366804067
KKR	2016-02-08 14:06:00	23.24345	-25.48648	0.00300134921462846	3.05137170153893
KKR	2016-02-08 16:05:00	23.24337	-25.48645	0.00443905844127952	8.80413257520438
KKR	2016-02-08 17:04:00	23.24542	-25.48608	0.2161960897194	212.59282155741
KKR	2016-02-08 18:05:00	23.248	-25.48832	0.357186918258007	363.140033562308
KKR	2016-02-08 19:05:00	23.25527	-25.49288	0.898798029923218	898.798029923218
KKR	2016-02-08 20:04:00	23.25215	-25.49448	0.370643519430015	364.466127439515
KKR	2016-02-08 21:04:00	23.25682	-25.4966	0.531048238771824	531.048238771824
KKR	2016-02-08 23:04:00	23.2674	-25.5005	0.580661932047824	1161.32386409565
KKR	2016-02-09 00:04:00	23.28012	-25.50947	1.63809791876251	1638.09791876251
KKR	2016-02-09 01:05:00	23.28685	-25.51315	0.785848689455018	798.946167612602
KKR	2016-02-09 02:05:00	23.29152	-25.51532	0.533465966226447	533.465966226447
KKR	2016-02-09 03:04:00	23.29253	-25.51533	0.10443898065718	102.69833097956
KKR	2016-02-09 04:04:00	23.29347	-25.51517	0.0972416560946001	97.2416560946001
KKR	2016-02-09 05:05:00	23.3003	-25.51892	0.798343678307334	811.649406279123
KKR	2016-02-09 06:06:00	23.30487	-25.52197	0.56731312380296	576.768342533009
KKR	2016-02-09 07:04:00	23.30105	-25.52592	0.609117410050802	588.813496382442
KKR	2016-02-09 08:04:00	23.29522	-25.53065	0.795088703323997	795.088703323997
KKR	2016-02-09 09:04:00	23.28253	-25.5403	1.68326660588213	1683.26660588213
KKR	2016-02-09 10:04:00	23.2732	-25.55375	1.78068362977867	1780.68362977867
KKR	2016-02-09 11:05:00	23.27295	-25.5613	0.832509237572954	846.384391532503
KKR	2016-02-09 12:04:00	23.27492	-25.56652	0.628717045443154	618.238428019101
KKR	2016-02-09 13:05:00	23.27095	-25.56663	0.397065105675048	403.682857436299
KKR	2016-02-09 14:04:00	23.26967	-25.56988	0.393268919418177	386.714437427874
KKR	2016-02-09 15:04:00	23.27005	-25.56992	0.0388800701501156	38.8800701501156
KKR	2016-02-09 16:05:00	23.27123	-25.5696	0.123121551082334	125.173576933706
KKR	2016-02-09 17:04:00	23.27327	-25.56572	0.489839173150826	481.675186931646
KKR	2016-02-09 18:04:00	23.26717	-25.5604	0.860099167773185	860.099167773185
KKR	2016-02-09 19:04:00	23.26238	-25.55707	0.613422980285452	613.422980285452
KKR	2016-02-09 20:04:00	23.25992	-25.55492	0.347232369504871	347.232369504871
KKR	2016-02-09 21:04:00	23.25923	-25.55368	0.155649313983897	155.649313983896
KKR	2016-02-09 22:04:00	23.25803	-25.55253	0.177442597237483	177.442597237483
KKR	2016-02-09 23:04:00	23.25448	-25.54948	0.497029769496815	497.029769496815
KKR	2016-02-10 00:04:00	23.25285	-25.54883	0.181001433999674	181.001433999674
KKR	2016-02-10 01:05:00	23.25165	-25.5515	0.317812966206358	323.109848976464
KKR	2016-02-10 02:05:00	23.25152	-25.55148	0.0134037511637633	13.4037511637633
KKR	2016-02-10 03:04:00	23.2513	-25.5514	0.0245022109664766	24.093840783702
KKR	2016-02-10 04:04:00	23.24932	-25.5514	0.201276207193654	201.276207193654
KKR	2016-02-10 05:05:00	23.24743	-25.5493	0.298816346199347	303.796618636003
KKR	2016-02-10 06:05:00	23.24443	-25.55365	0.57500137564624	575.001375646239
KKR	2016-02-10 07:05:00	23.2442	-25.5557	0.23091223247163	230.91223247163
KKR	2016-02-10 08:05:00	23.24537	-25.55935	0.425962977425293	425.962977425293
KKR	2016-02-10 09:04:00	23.24582	-25.56007	0.0943200347510196	92.7480341718359
KKR	2016-02-10 10:05:00	23.24733	-25.56183	0.245816513594878	249.913455488125
KKR	2016-02-10 13:52:00	23.24823	-25.56213	0.0257611547893284	97.4630356196256
KKR	2016-02-10 13:54:00	23.24933	-25.56292	4.27839981626662	142.613327208887
KKR	2016-02-10 14:09:00	23.25093	-25.56318	0.660882437248662	165.220609312165
KKR	2016-02-10 17:05:00	23.26317	-25.56427	0.42616484447087	1250.08354378122
KKR	2016-02-10 18:05:00	23.26985	-25.56702	0.745601971951211	745.601971951211
KKR	2016-02-10 19:04:00	23.27487	-25.56652	0.521978826892667	513.27917977779
KKR	2016-02-10 20:04:00	23.27483	-25.56658	0.00785675677648306	7.85675677648306
KKR	2016-02-10 21:04:00	23.26618	-25.56078	1.09331632545465	1093.31632545465
KKR	2016-02-10 22:04:00	23.26247	-25.5598	0.392761590264611	392.761590264611
KKR	2016-02-10 23:04:00	23.26148	-25.55863	0.165272134949483	165.272134949483
KKR	2016-02-11 01:06:00	23.26117	-25.55852	0.0166403055903377	33.8352880336867
KKR	2016-02-11 02:04:00	23.25928	-25.55748	0.232444243026293	224.696101592084
KKR	2016-02-11 03:04:00	23.25918	-25.55698	0.0569431524206457	56.9431524206457
KKR	2016-02-11 04:04:00	23.25755	-25.55883	0.265381313269336	265.381313269336
KKR	2016-02-11 05:04:00	23.25315	-25.5599	0.463038172657655	463.038172657655
KKR	2016-02-11 06:04:00	23.25253	-25.56143	0.182665568101904	182.665568101904
KKR	2016-02-11 07:04:00	23.2521	-25.56227	0.103782033928306	103.782033928306
KKR	2016-02-11 08:05:00	23.25103	-25.5628	0.121888020224414	123.919487228154
KKR	2016-02-11 09:04:00	23.25018	-25.56277	0.0879288876694715	86.4634062083137
KKR	2016-02-11 10:05:00	23.24925	-25.56457	0.219107376553541	222.759166162766
KKR	2016-02-11 11:05:00	23.24933	-25.56463	0.0105511894449501	10.5511894449501
KKR	2016-02-11 12:05:00	23.25218	-25.56563	0.310600625822515	310.600625822515
KKR	2016-02-11 13:05:00	23.25313	-25.56602	0.105989102656536	105.989102656536
KKR	2016-02-11 14:04:00	23.25415	-25.56722	0.172673228395153	169.795341255234
KKR	2016-02-11 15:04:00	23.25455	-25.5677	0.0674244401183828	67.4244401183828
KKR	2016-02-11 16:04:00	23.25613	-25.56807	0.16585584352262	165.85584352262
KKR	2016-02-11 17:04:00	23.25718	-25.5686	0.122133044559806	122.133044559806
KKR	2016-02-11 18:04:00	23.26158	-25.57038	0.489667542265112	489.667542265112
KKR	2016-02-11 21:19:00	23.26397	-25.56077	0.339667073963154	1103.91799038025
KKR	2016-02-11 22:17:00	23.25807	-25.55928	0.643977391857865	622.511478795936
KKR	2016-02-11 23:17:00	23.25618	-25.55838	0.216974922840798	216.974922840798
KKR	2016-02-12 00:18:00	23.25298	-25.56083	0.418667237487909	425.645024779374
KKR	2016-02-12 01:17:00	23.25283	-25.56127	0.0524842052683954	51.6094685139221
KKR	2016-02-12 02:17:00	23.2524	-25.5619	0.0830318964182245	83.0318964182245
KKR	2016-02-12 03:17:00	23.2524	-25.5626	0.0784412794449211	78.4412794449211
KKR	2016-02-12 07:30:00	23.24943	-25.56112	0.0816861937566718	344.443450340633
KKR	2016-02-12 08:28:00	23.2482	-25.56375	0.331179101859887	320.139798464557
KKR	2016-02-12 09:29:00	23.24693	-25.56495	0.183348416755009	186.404223700926
KKR	2016-02-12 10:29:00	23.24793	-25.56565	0.128392180141567	128.392180141567
KKR	2016-02-12 13:26:00	23.25068	-25.56612	0.0964187385158463	284.435278621747
KKR	2016-02-12 14:27:00	23.25057	-25.56653	0.046510032502974	47.2851997113569
KKR	2016-02-12 16:25:00	23.25338	-25.56697	0.147374139038607	289.835806775926
KKR	2016-02-12 17:25:00	23.25435	-25.56795	0.147580409219685	147.580409219685
KKR	2016-02-12 18:25:00	23.25627	-25.56765	0.198021749481973	198.021749481973
KKR	2016-02-12 23:53:00	23.2616	-25.55577	0.262912545791267	1437.25525032559
KKR	2016-02-13 00:52:00	23.2602	-25.5558	0.144759894406851	142.34722950007
KKR	2016-02-13 01:51:00	23.25893	-25.55602	0.133653935604811	131.426370011397
KKR	2016-02-13 02:51:00	23.258	-25.557	0.144900161045697	144.900161045697
KKR	2016-02-13 03:51:00	23.25592	-25.55838	0.261944244811725	261.944244811725
KKR	2016-02-13 04:51:00	23.25323	-25.56118	0.416185992023458	416.185992023458
KKR	2016-02-13 05:51:00	23.2516	-25.56152	0.170006497612309	170.006497612309
KKR	2016-02-13 06:52:00	23.25118	-25.56338	0.209269440681731	212.757264693093
KKR	2016-02-13 07:52:00	23.25207	-25.56397	0.112047842253605	112.047842253605
KKR	2016-02-13 08:52:00	23.25357	-25.56425	0.155659649438395	155.659649438395
KKR	2016-02-13 09:51:00	23.2522	-25.56602	0.246452066810727	242.344532363881
KKR	2016-02-13 10:54:00	23.25115	-25.56792	0.226821571323107	238.162649889262
KKR	2016-02-13 12:53:00	23.25147	-25.56847	0.0351368684244954	69.6881223752492
KKR	2016-02-13 14:51:00	23.25275	-25.56755	0.0844039967223191	165.994526887228
KKR	2016-02-13 15:53:00	23.25342	-25.5678	0.0712606392430844	73.6359938845205
KKR	2016-02-13 16:52:00	23.2552	-25.56712	0.199638309680234	196.311004518897
KKR	2016-02-13 17:51:00	23.2591	-25.5656	0.438753586727076	431.441026948291
KKR	2016-02-13 18:52:00	23.26647	-25.56315	0.78473414545221	797.813047876413
KKR	2016-02-13 20:51:00	23.27897	-25.56282	0.64085373198273	1271.02656843242
KKR	2016-02-14 00:43:00	23.3056	-25.52362	1.33434056148687	5159.45017108258
KKR	2016-02-14 01:44:00	23.30255	-25.5226	0.325053737279032	330.471299567016
KKR	2016-02-14 02:44:00	23.29613	-25.51967	0.730624526039283	730.624526039283
KKR	2016-02-14 03:43:00	23.28962	-25.51368	0.958620762525879	942.643749817115
KKR	2016-02-14 04:43:00	23.25228	-25.49035	4.61007627949893	4610.07627949893
KKR	2016-02-14 05:43:00	23.23402	-25.48753	1.88392456040187	1883.92456040187
KKR	2016-02-14 06:44:00	23.23467	-25.48488	0.299253848447994	304.241412588794
KKR	2016-02-14 07:43:00	23.23312	-25.48183	0.382787238864267	376.407451549862
KKR	2016-02-14 08:43:00	23.22742	-25.48182	0.579803259687704	579.803259687704
KKR	2016-02-14 09:43:00	23.23005	-25.48125	0.275044850875776	275.044850875776
KKR	2016-02-14 10:43:00	23.2308	-25.4814	0.0781200552645975	78.1200552645975
KKR	2016-02-14 18:05:00	23.23445	-25.47743	0.0786610039425449	579.469395710081
KKR	2016-02-14 19:05:00	23.2327	-25.47823	0.199314921435087	199.314921435087
KKR	2016-02-14 20:04:00	23.23262	-25.47717	0.121085407187561	119.067317067768
KKR	2016-02-14 21:04:00	23.23275	-25.47665	0.059755422514613	59.755422514613
KKR	2016-02-15 00:05:00	23.23272	-25.47718	0.0197147361528135	59.4727873943209
KKR	2016-02-15 01:03:00	23.23228	-25.47682	0.0623347047399556	60.2568812486238
KKR	2016-02-15 02:04:00	23.2318	-25.47688	0.048480085660071	49.2880870877388
KKR	2016-02-15 03:04:00	23.23262	-25.47687	0.0834207676920433	83.4207676920433
KKR	2016-02-15 04:05:00	23.2327	-25.47693	0.0103832567705732	10.5563110500827
KKR	2016-02-15 05:04:00	23.23317	-25.47718	0.056353050698722	55.4138331870766
KKR	2016-02-15 06:04:00	23.23665	-25.48045	0.509504197478995	509.504197478995
KKR	2016-02-15 07:04:00	23.23788	-25.48335	0.348236039379117	348.236039379117
KKR	2016-02-15 08:04:00	23.23865	-25.48565	0.269382764685892	269.382764685892
KKR	2016-02-15 09:04:00	23.2388	-25.4862	0.063495101201125	63.495101201125
KKR	2016-02-15 10:05:00	23.23925	-25.48673	0.0737546071447127	74.9838505971246
KKR	2016-02-15 13:14:00	23.24355	-25.49038	0.190101716469282	598.820406878238
KKR	2016-02-15 15:29:00	23.25748	-25.49668	0.703510706331683	1582.89908924629
KKR	2016-02-15 17:01:00	23.2655	-25.49885	0.555062249398454	851.09544907763
KKR	2016-02-15 17:59:00	23.27105	-25.50377	0.816186247839036	788.980039577735
KKR	2016-02-15 18:59:00	23.2885	-25.51312	2.06061050545125	2060.61050545125
KKR	2016-02-15 22:11:00	23.31438	-25.53203	1.05568367737722	3378.1877676071
KKR	2016-02-15 23:11:00	23.31378	-25.5323	0.0680832673974046	68.0832673974046
KKR	2016-02-16 00:10:00	23.31003	-25.53367	0.417916616535993	410.951339593727
KKR	2016-02-16 01:10:00	23.31238	-25.5314	0.348936743187029	348.936743187029
KKR	2016-02-16 02:09:00	23.31625	-25.52893	0.489153043424507	481.000492700765
KKR	2016-02-16 03:09:00	23.30527	-25.52768	1.12497490022308	1124.97490022308
KKR	2016-02-16 04:10:00	23.29697	-25.53047	0.885084179835169	899.835582832421
KKR	2016-02-16 05:09:00	23.29528	-25.53403	0.441675457011992	434.314199395125
KKR	2016-02-16 06:10:00	23.28647	-25.53348	0.883023883185884	897.740947905648
KKR	2016-02-16 07:10:00	23.26937	-25.54955	2.50284042171705	2502.84042171705
KKR	2016-02-16 08:09:00	23.2579	-25.5552	1.34922439279098	1326.7373195778
KKR	2016-02-16 09:09:00	23.25257	-25.561	0.846136317167847	846.136317167847
KKR	2016-02-16 10:10:00	23.2502	-25.56358	0.370152950461898	376.32216630293
KKR	2016-02-16 12:10:00	23.25163	-25.5654	0.125221157481524	250.442314963047
KKR	2016-02-16 13:10:00	23.24848	-25.56783	0.420308592160782	420.308592160782
KKR	2016-02-16 14:09:00	23.24773	-25.56693	0.128565542442281	126.422783401576
KKR	2016-02-16 15:10:00	23.24885	-25.567	0.112238005845506	114.108639276265
KKR	2016-02-16 16:10:00	23.24937	-25.56848	0.174066668067329	174.066668067329
KKR	2016-02-16 18:54:00	23.25153	-25.57048	0.114779661721709	313.731075372672
KKR	2016-02-16 19:53:00	23.25337	-25.56923	0.237615871095041	233.655606576791
KKR	2016-02-16 21:53:00	23.25625	-25.57085	0.172218795765643	344.437591531287
KKR	2016-02-16 22:53:00	23.25627	-25.57092	0.00810315328142114	8.10315328142114
KKR	2016-02-16 23:53:00	23.25648	-25.57072	0.030948812530047	30.948812530047
KKR	2016-02-17 00:53:00	23.25598	-25.57148	0.0991734805769151	99.1734805769151
KKR	2016-02-17 01:53:00	23.26287	-25.5703	0.712643368900301	712.643368900301
KKR	2016-02-17 02:52:00	23.2765	-25.56787	1.43571502559104	1411.78644183119
KKR	2016-02-17 03:52:00	23.26715	-25.56508	1.00040295553398	1000.40295553398
KKR	2016-02-17 04:52:00	23.26057	-25.56332	0.697265171704906	697.265171704906
KKR	2016-02-17 05:52:00	23.25845	-25.5633	0.215492854588198	215.492854588198
KKR	2016-02-17 06:52:00	23.2558	-25.56188	0.312844597802238	312.844597802238
KKR	2016-02-17 07:52:00	23.25467	-25.5614	0.126828972057232	126.828972057232
KKR	2016-02-17 08:53:00	23.25353	-25.56125	0.115168757287617	117.088236575744
KKR	2016-02-17 09:52:00	23.25315	-25.56115	0.0408995976871069	40.2179377256551
KKR	2016-02-17 10:53:00	23.25165	-25.56123	0.150228028449961	152.731828924127
KKR	2016-02-17 12:54:00	23.25077	-25.56318	0.117081475351535	236.114308625595
KKR	2016-02-17 13:52:00	23.25187	-25.56382	0.137413287877941	132.832844948676
KKR	2016-02-17 14:52:00	23.25232	-25.56567	0.212295044374437	212.295044374437
KKR	2016-02-17 15:53:00	23.25267	-25.56578	0.0370324226876558	37.6496297324501
KKR	2016-02-17 16:53:00	23.25637	-25.56628	0.380222414943389	380.222414943389
KKR	2016-02-17 17:52:00	23.25978	-25.5654	0.366455903402235	360.348305012198
KKR	2016-02-17 18:53:00	23.2685	-25.56733	0.897335103966681	912.290689032792
KKR	2016-02-17 19:53:00	23.28303	-25.56725	1.47677810133344	1476.77810133344
KKR	2016-02-17 20:52:00	23.29185	-25.5547	1.69591624103333	1667.65097034945
KKR	2016-02-17 21:53:00	23.3065	-25.53363	2.7454847586119	2791.2428379221
KKR	2016-02-17 22:52:00	23.31708	-25.52878	1.22543730890645	1205.01335375801
KKR	2016-02-17 23:52:00	23.31562	-25.52662	0.283897870039883	283.897870039883
KKR	2016-02-18 00:53:00	23.30708	-25.51857	1.23139733756226	1251.92062652163
KKR	2016-02-18 01:52:00	23.30382	-25.51763	0.353669524954445	347.775032871871
KKR	2016-02-18 02:52:00	23.30107	-25.52027	0.407025196259903	407.025196259903
KKR	2016-02-18 03:55:00	23.30092	-25.52063	0.0410697190578593	43.1232050107523
KKR	2016-02-18 04:52:00	23.29955	-25.52068	0.146735712374081	139.398926755377
KKR	2016-02-18 05:52:00	23.29615	-25.52045	0.346635607699902	346.635607699902
KKR	2016-02-18 06:52:00	23.27427	-25.51508	2.30458733712094	2304.58733712094
KKR	2016-02-18 07:53:00	23.26442	-25.5066	1.35799045189106	1380.62362608925
KKR	2016-02-18 08:52:00	23.25847	-25.503	0.739541557311077	727.215864689226
KKR	2016-02-18 09:52:00	23.24097	-25.4887	2.39490324192333	2394.90324192333
KKR	2016-02-18 10:52:00	23.23737	-25.486	0.475001297374402	475.001297374402
KKR	2016-02-18 11:52:00	23.23742	-25.48593	0.00934879586370957	9.34879586370957
KKR	2016-02-18 12:55:00	23.23745	-25.486	0.00801623523194849	8.41704699354591
KKR	2016-02-18 15:52:00	23.23557	-25.48617	0.0651423095972622	192.169813311923
KKR	2016-02-18 21:13:00	23.25432	-25.50193	0.485824432064179	2599.16071154336
KKR	2016-02-18 22:13:00	23.2578	-25.51365	1.36016694195002	1360.16694195002
KKR	2016-02-18 23:13:00	23.26198	-25.52517	1.35906761172707	1359.06761172707
KKR	2016-02-19 00:23:00	23.26493	-25.53518	0.995218812470567	1161.08861454899
KKR	2016-02-19 01:23:00	23.26683	-25.54367	0.970761363794502	970.761363794501
KKR	2016-02-19 02:22:00	23.27248	-25.56368	2.35381981924322	2314.5894889225
KKR	2016-02-19 03:22:00	23.27195	-25.56818	0.507110026385307	507.110026385307
KKR	2016-02-19 04:23:00	23.26683	-25.57002	0.550551152255519	559.727004793111
KKR	2016-02-19 05:22:00	23.26537	-25.57082	0.176300674961136	173.362330378451
KKR	2016-02-19 06:23:00	23.26367	-25.57073	0.170235271580735	173.07252610708
KKR	2016-02-19 07:22:00	23.2589	-25.5672	0.636309042120729	625.703891418717
KKR	2016-02-19 08:22:00	23.2569	-25.56013	0.81791111695164	817.91111695164
KKR	2016-02-19 09:24:00	23.25812	-25.5609	0.146198536015714	151.071820549571
KKR	2016-02-19 10:24:00	23.2556	-25.56097	0.256264936728333	256.264936728333
KKR	2016-02-19 11:22:00	23.25058	-25.5622	0.546772513214361	528.546762773882
KKR	2016-02-19 14:25:00	23.25102	-25.56308	0.0355016903496192	108.280155566338
KKR	2016-02-19 15:23:00	23.24957	-25.56412	0.194372813788052	187.893719995117
KKR	2016-02-19 16:22:00	23.24952	-25.5646	0.054943965618534	54.0282328582251
KKR	2016-02-19 17:23:00	23.24958	-25.56458	0.00639086600455423	6.49738043796347
KKR	2016-02-19 18:24:00	23.2512	-25.56688	0.300831425933605	305.845283032499
KKR	2016-02-19 19:22:00	23.25585	-25.5656	0.51094805349639	493.916451713177
KKR	2016-02-19 20:23:00	23.25808	-25.56827	0.369199995296523	375.353328551465
KKR	2016-02-19 21:22:00	23.26808	-25.56863	1.03440785549457	1017.16772456966
KKR	2016-02-19 22:24:00	23.27657	-25.56798	0.838012379196744	865.946125169968
KKR	2016-02-19 23:22:00	23.27655	-25.56785	0.0152151115626039	14.7079411771838
KKR	2016-02-20 00:22:00	23.27668	-25.56778	0.015365249631997	15.365249631997
KKR	2016-02-20 01:23:00	23.27638	-25.56787	0.0315882138548755	32.11468408579
KKR	2016-02-20 02:23:00	23.26755	-25.56517	0.947072245927262	947.072245927262
KKR	2016-02-20 03:23:00	23.2555	-25.56115	1.30499534197146	1304.99534197146
KKR	2016-02-20 04:23:00	23.2526	-25.5597	0.336589600651476	336.589600651476
KKR	2016-02-20 05:22:00	23.24283	-25.56452	1.14962596121772	1130.46552853076
KKR	2016-02-20 08:23:00	23.2441	-25.5734	0.332632826447561	1003.44235978348
KKR	2016-02-20 09:23:00	23.24312	-25.57528	0.233034236293361	233.034236293361
KKR	2016-02-20 10:23:00	23.2439	-25.57652	0.159979269966549	159.979269966549
KKR	2016-02-20 11:22:00	23.24528	-25.57653	0.142637164484883	140.259878410135
KKR	2016-02-20 12:23:00	23.24777	-25.5786	0.337665534203369	343.293293106759
KKR	2016-02-20 13:22:00	23.24757	-25.579	0.0500516250035923	49.2174312535325
KKR	2016-02-20 16:23:00	23.2523	-25.583	0.217877448461575	657.263636192419
KKR	2016-02-20 17:22:00	23.25372	-25.58595	0.366811904592977	360.69837284976
KKR	2016-02-20 18:23:00	23.25835	-25.59142	0.760048703047991	772.716181432124
KKR	2016-02-20 19:23:00	23.26253	-25.5919	0.428152401010457	428.152401010457
KKR	2016-02-20 20:22:00	23.27255	-25.59057	1.0464822141189	1029.04084388358
KKR	2016-02-20 21:23:00	23.27763	-25.57695	1.58469060196435	1611.10211199709
KKR	2016-02-20 22:24:00	23.27463	-25.56688	1.14967279493073	1168.83400817958
KKR	2016-02-20 23:55:00	23.27098	-25.56823	0.264148530837246	400.625271769822
KKR	2016-02-21 00:55:00	23.26678	-25.5676	0.432668192698981	432.668192698981
KKR	2016-02-21 01:54:00	23.26552	-25.56782	0.132623747295433	130.413351507176
KKR	2016-02-21 02:54:00	23.26523	-25.5681	0.0430485237246106	43.0485237246106
KKR	2016-02-21 03:55:00	23.26362	-25.56877	0.177084411692498	180.03581855404
KKR	2016-02-21 04:55:00	23.26252	-25.5686	0.113411504630096	113.411504630096
KKR	2016-02-21 05:54:00	23.26265	-25.56982	0.139673388699756	137.345498888093
KKR	2016-02-21 06:54:00	23.26367	-25.57072	0.144629951315471	144.629951315471
KKR	2016-02-21 07:54:00	23.26613	-25.57157	0.267547757692392	267.547757692392
KKR	2016-02-21 08:54:00	23.27022	-25.57243	0.426700846232566	426.700846232567
KKR	2016-02-21 09:55:00	23.27188	-25.5719	0.175924070242965	178.856138080348
KKR	2016-02-21 10:54:00	23.2722	-25.57162	0.045955292116004	45.1893705807372
KKR	2016-02-21 11:55:00	23.27303	-25.56968	0.229354141008689	233.176710025501
KKR	2016-02-21 12:54:00	23.27367	-25.56927	0.0809835386822544	79.6338130375502
KKR	2016-02-21 13:56:00	23.2689	-25.57383	0.681624019450839	704.344820099201
KKR	2016-02-21 14:55:00	23.26628	-25.57253	0.308660856703557	303.516509091831
KKR	2016-02-21 15:54:00	23.26588	-25.57188	0.084826828176635	83.4130477070244
KKR	2016-02-21 16:54:00	23.2647	-25.57145	0.129244999669295	129.244999669295
KKR	2016-02-21 17:56:00	23.26312	-25.56962	0.252054157948177	260.455963213116
KKR	2016-02-21 18:55:00	23.26128	-25.5679	0.273104836489924	268.553089215092
KKR	2016-02-21 19:54:00	23.26007	-25.56435	0.423435425006952	416.378167923502
KKR	2016-02-21 20:55:00	23.2586	-25.56447	0.147557107220879	150.016392341227
KKR	2016-02-21 21:53:00	23.25865	-25.5654	0.107934914077095	104.337083607859
KKR	2016-02-21 22:53:00	23.25853	-25.56538	0.012401054053721	12.401054053721
KKR	2016-02-21 23:53:00	23.25737	-25.5651	0.122006768384398	122.006768384398
KKR	2016-02-22 00:54:00	23.25735	-25.56592	0.0904029913346781	91.9097078569227
KKR	2016-02-22 01:53:00	23.2591	-25.5692	0.415244793552924	408.324046993708
KKR	2016-02-22 02:54:00	23.26132	-25.56968	0.228153125125852	231.955677211283
KKR	2016-02-22 03:54:00	23.26317	-25.5695	0.189105300079448	189.105300079448
KKR	2016-02-22 04:53:00	23.2636	-25.57038	0.109687977382182	107.859844425812
KKR	2016-02-22 06:54:00	23.2663	-25.57147	0.14894232292941	300.367017907644
KKR	2016-02-22 07:54:00	23.2702	-25.57445	0.518274079782032	518.274079782032
KKR	2016-02-22 08:53:00	23.27118	-25.57432	0.102362827683298	100.656780555243
KKR	2016-02-22 09:53:00	23.27273	-25.57442	0.157923655338022	157.923655338022
KKR	2016-02-22 11:26:00	23.27503	-25.5711	0.283456379243336	439.357387827171
KKR	2016-02-22 12:25:00	23.27652	-25.56787	0.398982441196145	392.332733842876
KKR	2016-02-22 14:35:00	23.26377	-25.56938	0.603158842879404	1306.84415957204
KKR	2016-02-22 15:34:00	23.2615	-25.57388	0.56392319979221	554.524479795673
KKR	2016-02-22 17:04:00	23.25448	-25.57457	0.478427454865509	717.641182298263
KKR	2016-02-22 18:04:00	23.25333	-25.57093	0.42430846513871	424.30846513871
KKR	2016-02-22 19:04:00	23.25343	-25.56878	0.241140383108523	241.140383108523
KKR	2016-02-22 20:04:00	23.25547	-25.5655	0.422002720286139	422.002720286139
KKR	2016-02-22 21:04:00	23.2549	-25.56105	0.502013393479699	502.013393479699
KKR	2016-02-22 22:03:00	23.2566	-25.55997	0.214538623418799	210.962979695152
KKR	2016-02-22 23:25:00	23.26002	-25.55973	0.255121386086663	348.665894318439
KKR	2016-02-23 00:23:00	23.26382	-25.56083	0.419419563967288	405.438911835045
KKR	2016-02-23 01:24:00	23.26598	-25.5616	0.232026935835683	235.894051432945
KKR	2016-02-23 02:24:00	23.2764	-25.5681	1.28534631225018	1285.34631225018
KKR	2016-02-23 03:24:00	23.27195	-25.56667	0.479821364349952	479.821364349952
KKR	2016-02-23 04:24:00	23.27105	-25.56698	0.0978460332051211	97.846033205121
KKR	2016-02-23 05:24:00	23.26955	-25.56702	0.152520193931589	152.520193931589
KKR	2016-02-23 06:24:00	23.26867	-25.56645	0.109904850326581	109.904850326581
KKR	2016-02-23 07:24:00	23.26368	-25.56432	0.560531215290935	560.531215290935
KKR	2016-02-23 08:24:00	23.25227	-25.56362	1.16238359392143	1162.38359392143
KKR	2016-02-23 09:24:00	23.25005	-25.5671	0.450543980647905	450.543980647905
KKR	2016-02-23 10:25:00	23.24895	-25.56893	0.229738296777512	233.567268390471
KKR	2016-02-23 11:23:00	23.24783	-25.56735	0.217751618596097	210.49323130956
KKR	2016-02-23 12:24:00	23.24768	-25.56718	0.0239999828042165	24.3999825176201
KKR	2016-02-23 14:24:00	23.24792	-25.56558	0.0904740908590995	180.948181718199
KKR	2016-02-23 15:26:00	23.24865	-25.56535	0.0760145038559944	78.5483206511942
KKR	2016-02-23 16:24:00	23.2511	-25.56312	0.364955421200105	352.790240493435
KKR	2016-02-23 17:24:00	23.25355	-25.5614	0.314904827316815	314.904827316815
KKR	2016-02-23 18:24:00	23.25258	-25.56053	0.138656991717966	138.656991717966
KKR	2016-02-23 19:24:00	23.25792	-25.55905	0.567561933380903	567.561933380903
KKR	2016-02-23 20:24:00	23.26247	-25.55902	0.462499701346179	462.499701346179
KKR	2016-02-23 21:24:00	23.26892	-25.5629	0.786659626440414	786.659626440414
KKR	2016-02-23 22:24:00	23.27635	-25.5682	0.960711686057078	960.711686057078
KKR	2016-02-23 23:23:00	23.26933	-25.56687	0.741230987040039	728.877137256038
KKR	2016-02-24 00:24:00	23.26758	-25.56478	0.289259171141015	294.080157326699
KKR	2016-02-24 01:24:00	23.26583	-25.56252	0.30946804616988	309.46804616988
KKR	2016-02-24 02:24:00	23.26392	-25.56202	0.202058707099609	202.058707099609
KKR	2016-02-24 03:23:00	23.26218	-25.56192	0.18021593451241	177.21233560387
KKR	2016-02-24 04:24:00	23.25973	-25.56038	0.298008091501474	302.974893026499
KKR	2016-02-24 05:24:00	23.25868	-25.55978	0.126139371200602	126.139371200602
KKR	2016-02-24 06:24:00	23.25677	-25.56005	0.196486207235202	196.486207235202
KKR	2016-02-24 07:24:00	23.25322	-25.5604	0.362968003461536	362.968003461536
KKR	2016-02-24 08:24:00	23.25338	-25.56162	0.137675602132521	137.675602132521
KKR	2016-02-24 09:24:00	23.25262	-25.56243	0.119190324471248	119.190324471248
KKR	2016-02-24 10:24:00	23.25065	-25.56328	0.221739669105893	221.739669105893
KKR	2016-02-24 12:25:00	23.25073	-25.56322	0.00523201275475375	10.5512257220867
KKR	2016-02-24 13:24:00	23.25072	-25.56325	0.00357161161143885	3.5120847512482
KKR	2016-02-24 14:24:00	23.25197	-25.56388	0.145351014313272	145.351014313272
KKR	2016-02-24 15:25:00	23.2536	-25.56488	0.196736844340755	200.015791746434
KKR	2016-02-24 16:24:00	23.25455	-25.56498	0.0988555629264792	97.2079702110378
KKR	2016-02-24 17:24:00	23.25368	-25.56395	0.145401177156813	145.401177156813
KKR	2016-02-24 18:24:00	23.25743	-25.56118	0.491563476137013	491.563476137013
KKR	2016-02-24 19:24:00	23.26182	-25.56105	0.446454639809755	446.454639809755
KKR	2016-02-24 20:24:00	23.26693	-25.56503	0.684588560046629	684.588560046629
KKR	2016-02-24 21:23:00	23.27618	-25.56785	1.00863075397012	991.820241403947
KKR	2016-02-24 22:24:00	23.27645	-25.56787	0.0270811802312866	27.5325332351414
KKR	2016-02-24 23:24:00	23.27285	-25.5648	0.502207147710978	502.207147710978
KKR	2016-02-25 00:24:00	23.26815	-25.56122	0.623800642191107	623.800642191107
KKR	2016-02-25 01:23:00	23.2635	-25.55862	0.564632743301835	555.222197580138
KKR	2016-02-25 02:24:00	23.26752	-25.55903	0.404444711061626	411.185456245987
KKR	2016-02-25 03:24:00	23.26737	-25.5586	0.0505382839953816	50.5382839953816
KKR	2016-02-25 05:24:00	23.26692	-25.55832	0.0277333732534531	55.4667465069063
KKR	2016-02-25 06:24:00	23.26353	-25.55743	0.358719646531446	358.719646531446
KKR	2016-02-25 07:24:00	23.2615	-25.55828	0.227264047453858	227.264047453858
KKR	2016-02-25 08:24:00	23.25977	-25.55742	0.200523395548132	200.523395548132
KKR	2016-02-25 09:24:00	23.25812	-25.5576	0.16892644570236	168.92644570236
KKR	2016-02-25 10:24:00	23.25705	-25.55952	0.241078653110084	241.078653110084
KKR	2016-02-25 12:27:00	23.2579	-25.5592	0.0456316130336119	93.5448067189044
KKR	2016-02-25 13:24:00	23.25813	-25.55987	0.082772828076932	78.6341866730854
KKR	2016-02-25 14:24:00	23.25893	-25.56073	0.126092508663798	126.092508663798
KKR	2016-02-25 15:24:00	23.2588	-25.562	0.14292478563936	142.92478563936
KKR	2016-02-25 16:24:00	23.2578	-25.56337	0.18411745028584	184.11745028584
KKR	2016-02-25 17:23:00	23.25698	-25.56557	0.264645239574803	260.23448558189
KKR	2016-02-25 18:24:00	23.26018	-25.5656	0.319934221966341	325.266458999114
KKR	2016-02-25 19:24:00	23.26638	-25.56728	0.657677021132721	657.677021132721
KKR	2016-02-25 20:24:00	23.27635	-25.56822	1.01876367766978	1018.76367766978
KKR	2016-02-25 21:24:00	23.27595	-25.5673	0.110814737160597	110.814737160597
KKR	2016-02-25 22:24:00	23.27092	-25.564	0.630945520143675	630.945520143675
KKR	2016-02-25 23:24:00	23.26695	-25.56282	0.424621137193016	424.621137193016
KKR	2016-02-26 00:24:00	23.26215	-25.56072	0.541667081008662	541.667081008663
KKR	2016-02-26 01:24:00	23.26073	-25.55983	0.175438493024583	175.438493024583
KKR	2016-02-26 02:25:00	23.25975	-25.56043	0.118208581477329	120.178724501951
KKR	2016-02-26 03:24:00	23.25838	-25.56072	0.145418163195408	142.994527142152
KKR	2016-02-26 04:24:00	23.25683	-25.5609	0.15883521296394	158.83521296394
KKR	2016-02-26 05:24:00	23.25423	-25.56012	0.278357124995792	278.357124995792
KKR	2016-02-26 06:24:00	23.25138	-25.5612	0.313954913430476	313.954913430476
KKR	2016-02-26 07:24:00	23.25067	-25.56225	0.138031483308209	138.031483308209
KKR	2016-02-26 08:24:00	23.25107	-25.56292	0.0853817464225771	85.3817464225771
KKR	2016-02-26 09:24:00	23.2486	-25.56473	0.322754849933401	322.754849933401
KKR	2016-02-26 10:25:00	23.24782	-25.5655	0.115258052927939	117.179020476738
KKR	2016-02-26 11:25:00	23.24807	-25.56593	0.0544755229207755	54.4755229207755
KKR	2016-02-26 12:25:00	23.24892	-25.56615	0.0898446603777942	89.8446603777942
KKR	2016-02-26 13:24:00	23.25003	-25.56548	0.137818388654589	135.521415510346
KKR	2016-02-26 15:55:00	23.24977	-25.56882	0.149090431710438	375.210919804603
KKR	2016-02-26 16:56:00	23.24983	-25.57062	0.198491306608985	201.799495052468
KKR	2016-02-26 17:55:00	23.25265	-25.5709	0.293217539508048	288.330580516247
KKR	2016-02-26 18:56:00	23.25363	-25.56963	0.170860608439739	173.708285247068
KKR	2016-02-26 19:54:00	23.25548	-25.56837	0.243249256749622	235.140948191302
KKR	2016-02-26 20:56:00	23.25663	-25.56888	0.125910478444719	130.107494392876
KKR	2016-02-26 21:55:00	23.26115	-25.5703	0.494415505094621	486.175246676377
KKR	2016-02-26 22:55:00	23.27128	-25.56747	1.07729943096256	1077.29943096256
KKR	2016-02-26 23:55:00	23.2763	-25.56815	0.515864273280257	515.864273280257
KKR	2016-02-27 00:55:00	23.27542	-25.57205	0.446062808538603	446.062808538603
KKR	2016-02-27 01:54:00	23.27205	-25.57088	0.372948344732436	366.732538986896
KKR	2016-02-27 02:55:00	23.2748	-25.56668	0.538386744779971	547.359857192971
KKR	2016-02-27 04:55:00	23.26662	-25.56652	0.41578975810615	831.579516212299
KKR	2016-02-27 05:55:00	23.26577	-25.56725	0.118974012234351	118.974012234351
KKR	2016-02-27 06:54:00	23.26482	-25.56807	0.13554756697366	133.288440857432
KKR	2016-02-27 07:54:00	23.2602	-25.56528	0.564125212944848	564.125212944847
KKR	2016-02-27 09:55:00	23.25945	-25.56293	0.135939996399782	274.145659406227
KKR	2016-02-27 10:55:00	23.261	-25.56217	0.179090755742735	179.090755742735
KKR	2016-02-27 13:14:00	23.26565	-25.56382	0.219069187323858	507.510283966938
KKR	2016-02-27 13:57:00	23.26655	-25.56418	0.139500965778744	99.9756921414334
KKR	2016-02-27 14:55:00	23.26742	-25.5658	0.208883316327461	201.920539116546
KKR	2016-02-27 15:55:00	23.27132	-25.56665	0.407667383814177	407.667383814177
KKR	2016-02-27 16:55:00	23.27315	-25.56407	0.343761871446467	343.761871446467
KKR	2016-02-27 17:55:00	23.26757	-25.55932	0.777793529927521	777.793529927521
KKR	2016-02-27 18:55:00	23.26667	-25.55635	0.345147361076003	345.147361076003
KKR	2016-02-27 19:54:00	23.26485	-25.55307	0.418449040521733	411.474889846371
KKR	2016-02-27 20:55:00	23.26418	-25.55202	0.133719487758236	135.94814588754
KKR	2016-02-27 21:55:00	23.26343	-25.55172	0.0833207470129336	83.3207470129336
KKR	2016-02-27 22:55:00	23.2637	-25.55218	0.0583972065074576	58.3972065074576
KKR	2016-02-27 23:55:00	23.26225	-25.55198	0.149087915049416	149.087915049416
KKR	2016-02-28 00:55:00	23.26135	-25.55148	0.107279626950008	107.279626950008
KKR	2016-02-28 01:55:00	23.26138	-25.55242	0.105377334439646	105.377334439646
KKR	2016-02-28 03:55:00	23.26112	-25.55412	0.0961604353333718	192.320870666744
KKR	2016-02-28 04:55:00	23.26168	-25.55447	0.0691266667381896	69.1266667381896
KKR	2016-02-28 05:55:00	23.26187	-25.55492	0.0539974579623719	53.9974579623719
KKR	2016-02-28 06:55:00	23.26235	-25.5577	0.315314420462486	315.314420462486
KKR	2016-02-28 07:54:00	23.26045	-25.5576	0.196732028518975	193.453161376992
KKR	2016-02-28 08:55:00	23.25835	-25.55607	0.26929890150391	273.787216528975
KKR	2016-02-28 09:55:00	23.25633	-25.5573	0.24730068060884	247.30068060884
KKR	2016-02-28 10:55:00	23.25627	-25.55858	0.14356376150328	143.56376150328
KKR	2016-02-28 11:55:00	23.26005	-25.55967	0.403169126093765	403.169126093765
KKR	2016-02-28 12:55:00	23.26385	-25.56142	0.433175683521386	433.175683521386
KKR	2016-02-28 13:57:00	23.26727	-25.5619	0.340405390958064	351.752237323333
KKR	2016-02-28 14:55:00	23.26742	-25.5629	0.116986884374522	113.087321562038
KKR	2016-02-28 15:54:00	23.27152	-25.56482	0.476929612945166	468.980786062747
KKR	2016-02-28 16:55:00	23.27657	-25.56673	0.546981282266438	556.097636970879
KKR	2016-02-28 17:56:00	23.27913	-25.55667	1.13791818285514	1156.88348590273
KKR	2016-02-28 18:55:00	23.27928	-25.54517	1.31052725177572	1288.68513091279
KKR	2016-02-28 21:48:00	23.31595	-25.52868	1.4429414134819	4160.48107553948
KKR	2016-02-28 22:48:00	23.31705	-25.52907	0.120057737291573	120.057737291573
KKR	2016-02-28 23:47:00	23.31552	-25.52897	0.15858228244234	155.939244401634
KKR	2016-02-29 00:48:00	23.3115	-25.52792	0.418293345066175	425.264900817278
KKR	2016-02-29 01:49:00	23.30993	-25.52717	0.177419695477069	180.376690401687
KKR	2016-02-29 02:47:00	23.30573	-25.52783	0.448275340868382	433.332829506103
KKR	2016-02-29 03:48:00	23.2974	-25.53018	0.872291331755747	886.829520618342
KKR	2016-02-29 04:49:00	23.29598	-25.53082	0.158546410821118	161.18885100147
KKR	2016-02-29 05:48:00	23.29075	-25.53183	0.552812675933886	543.599131334988
KKR	2016-02-29 06:48:00	23.28825	-25.53338	0.307826384680113	307.826384680113
KKR	2016-02-29 07:48:00	23.28867	-25.53962	0.700490141725388	700.490141725388
KKR	2016-02-29 08:48:00	23.2846	-25.54537	0.765686907376797	765.686907376797
KKR	2016-02-29 09:48:00	23.28287	-25.54983	0.529782960386852	529.782960386852
KKR	2016-02-29 13:50:00	23.27882	-25.55293	0.133546653492825	538.638169087727
KKR	2016-02-29 14:48:00	23.27693	-25.55333	0.204073210077788	197.270769741861
KKR	2016-02-29 15:49:00	23.27587	-25.5525	0.14000006256738	142.333396943503
KKR	2016-02-29 16:49:00	23.27535	-25.55213	0.067176825234649	67.176825234649
KKR	2016-02-29 17:49:00	23.27265	-25.54965	0.390574261474674	390.574261474674
KKR	2016-02-29 18:49:00	23.2714	-25.54713	0.309647073380808	309.647073380808
KKR	2016-02-29 19:50:00	23.26952	-25.54837	0.232406683615911	236.280128342842
KKR	2016-02-29 20:48:00	23.26787	-25.54925	0.201274502974313	194.565352875169
KKR	2016-02-29 21:50:00	23.2669	-25.5509	0.202780445296506	209.539793473057
KKR	2016-03-01 01:07:00	23.26543	-25.5537	0.105843598324566	347.51981449899
KKR	2016-03-01 02:05:00	23.26828	-25.55778	0.559902821551897	541.239394166833
KKR	2016-03-01 03:05:00	23.27135	-25.56047	0.433854010463796	433.854010463796
KKR	2016-03-01 04:06:00	23.2726	-25.56682	0.710944871403184	722.793952593237
KKR	2016-03-01 05:06:00	23.2671	-25.56822	0.580592821776905	580.592821776905
KKR	2016-03-01 06:05:00	23.26433	-25.56967	0.330562279938645	325.052908606334
KKR	2016-03-01 07:05:00	23.26272	-25.56977	0.164016448728529	164.016448728529
KKR	2016-03-01 08:06:00	23.26052	-25.57112	0.265538183135998	269.963819521598
KKR	2016-03-01 09:05:00	23.25515	-25.56825	0.644233092039441	633.495873838783
KKR	2016-03-01 10:06:00	23.25248	-25.5666	0.322996242522657	328.379513231368
KKR	2016-03-01 12:07:00	23.25215	-25.56557	0.0596011409116653	120.195634171858
KKR	2016-03-01 13:07:00	23.25285	-25.56248	0.353496526848938	353.496526848938
KKR	2016-03-01 14:06:00	23.25213	-25.56273	0.0796909366466028	78.3627543691594
KKR	2016-03-01 18:07:00	23.26645	-25.56558	0.370986675989396	1490.12981522407
KKR	2016-03-01 23:48:00	23.26922	-25.56075	0.107344422065554	610.074132072566
KKR	2016-03-02 03:48:00	23.2664	-25.55757	0.114327838569975	457.311354279899
KKR	2016-03-02 07:47:00	23.2587	-25.55843	0.19797087464277	788.583983993701
KKR	2016-03-02 15:48:00	23.26965	-25.57288	0.245090514864053	1964.80896082683
KKR	2016-03-02 19:47:00	23.27153	-25.55282	0.566337340783173	2255.91040745297
KKR	2016-03-02 23:47:00	23.2664	-25.55068	0.143489152311969	573.956609247877
KKR	2016-03-03 03:47:00	23.26365	-25.55032	0.0706095188015342	282.438075206137
KKR	2016-03-03 07:48:00	23.26552	-25.56583	0.435273002789638	1748.34656120504
KKR	2016-03-03 11:48:00	23.26818	-25.569	0.111598693748708	446.39477499483
KKR	2016-03-03 15:48:00	23.2604	-25.5571	0.387575594892794	1550.30237957117
KKR	2016-03-03 19:47:00	23.2617	-25.5472	0.280469634511312	1117.20404413673
KKR	2016-03-03 23:48:00	23.27463	-25.56685	0.63841183613284	2564.28754180024
KKR	2016-03-04 03:47:00	23.27032	-25.56297	0.154941806773374	617.184863647273
KKR	2016-03-04 07:47:00	23.25745	-25.5543	0.407367485978745	1629.46994391498
KKR	2016-03-04 11:48:00	23.24493	-25.55453	0.316914975599426	1272.94181865769
KKR	2016-03-04 15:48:00	23.24817	-25.55502	0.0834751291412288	333.900516564915
KKR	2016-03-04 19:48:00	23.2664	-25.55752	0.468528106509795	1874.11242603918
KKR	2016-03-04 23:47:00	23.2714	-25.56368	0.215187687443287	857.164288315761
KKR	2016-03-05 03:47:00	23.26782	-25.56215	0.100559292305668	402.237169222672
KKR	2016-03-05 07:47:00	23.2574	-25.55838	0.2850681504667	1140.2726018668
KKR	2016-03-05 11:48:00	23.24882	-25.55888	0.217577239975898	873.935247236522
KKR	2016-03-05 15:47:00	23.2512	-25.55925	0.0616191888538505	245.449768934505
KKR	2016-03-06 03:33:00	23.26368	-25.55602	0.112112111955127	1319.18585067199
KKR	2016-03-06 07:33:00	23.25338	-25.55443	0.265509949925027	1062.03979970011
KKR	2016-03-06 11:33:00	23.24457	-25.56035	0.278621078524987	1114.48431409995
KKR	2016-03-06 15:33:00	23.2507	-25.55868	0.162649995681489	650.599982725954
KKR	2016-03-06 19:33:00	23.26578	-25.55237	0.422022801834783	1688.09120733913
KKR	2016-03-07 03:33:00	23.27018	-25.56693	0.211462982270852	1691.70385816682
KKR	2016-03-07 07:32:00	23.25335	-25.57295	0.46160879084017	1838.74168351334
KKR	2016-03-07 11:32:00	23.24892	-25.57077	0.128063220957223	512.252883828893
KKR	2016-03-07 15:32:00	23.24802	-25.5653	0.154939103751264	619.756415005055
KKR	2016-03-07 19:32:00	23.25757	-25.55148	0.456936928933129	1827.74771573252
KKR	2016-03-08 03:33:00	23.26225	-25.5492	0.0673597514775676	540.000674345167
KKR	2016-03-08 07:32:00	23.26227	-25.5494	0.00564936436969056	22.5033014059341
KKR	2016-03-08 11:32:00	23.2639	-25.54773	0.0624870896476705	249.948358590682
KKR	2016-03-08 15:32:00	23.2676	-25.54887	0.0993047813314873	397.219125325949
KKR	2016-03-08 19:33:00	23.2764	-25.56827	0.585228566230718	2350.66807436005
KKR	2016-03-08 23:32:00	23.26905	-25.5631	0.237322967735293	945.336488145582
KKR	2016-03-09 03:32:00	23.26693	-25.55575	0.212831213903987	851.324855615946
KKR	2016-03-09 07:33:00	23.26362	-25.55447	0.0910583282149581	365.750951663415
KKR	2016-03-09 11:33:00	23.25932	-25.55098	0.14662800350702	586.512014028078
KKR	2016-03-09 15:34:00	23.25865	-25.55518	0.118392367682766	475.542676859109
KKR	2016-03-09 19:32:00	23.25362	-25.55178	0.160751270351184	637.646705726363
KKR	2016-03-09 23:33:00	23.2574	-25.54908	0.121760582383373	489.071672573214
KKR	2016-03-10 03:33:00	23.25865	-25.54952	0.0340746774874299	136.29870994972
KKR	2016-03-10 07:32:00	23.26685	-25.56285	0.429421076333658	1710.52728739574
KKR	2016-03-10 11:32:00	23.2735	-25.56655	0.198230662093891	792.922648375562
KKR	2016-03-10 15:32:00	23.2637	-25.5588	0.330371447631184	1321.48579052474
KKR	2016-03-10 19:32:00	23.25995	-25.5546	0.151409040180381	605.636160721526
KKR	2016-03-11 03:33:00	23.25958	-25.54972	0.0683738314584024	548.130215524859
KKR	2016-03-11 07:32:00	23.26333	-25.5519	0.113661794472751	452.752814649792
KKR	2016-03-11 11:33:00	23.26873	-25.55585	0.175550465203834	705.127701902065
KKR	2016-03-11 15:32:00	23.27395	-25.56105	0.197837830665339	788.054025483602
KKR	2016-03-11 19:33:00	23.27527	-25.54625	0.414224762479075	1663.80279595762
KKR	2016-03-11 23:33:00	23.27303	-25.5486	0.0870300508312991	348.120203325197
KKR	2016-03-12 03:33:00	23.27062	-25.54833	0.0617105183971375	246.84207358855
KKR	2016-03-12 11:34:00	23.26762	-25.54937	0.0407232679036751	326.464864361129
KKR	2016-03-12 15:33:00	23.26753	-25.55058	0.0341158356109294	135.894745183535
KKR	2016-03-12 19:32:00	23.26873	-25.55802	0.211522149469714	842.563228721027
KKR	2016-03-12 23:32:00	23.27628	-25.56758	0.329431644730428	1317.72657892171
KKR	2016-03-13 03:32:00	23.27653	-25.56085	0.18863515312965	754.540612518602
KKR	2016-03-13 07:32:00	23.27277	-25.55258	0.250598583793424	1002.3943351737
KKR	2016-03-13 11:32:00	23.252	-25.55503	0.532259170702147	2129.03668280859
KKR	2016-03-13 23:29:00	23.2633	-25.55532	0.0961589716716747	1149.09971147651
KKR	2016-03-14 03:29:00	23.26458	-25.55528	0.0325466239458108	130.186495783243
KKR	2016-03-14 07:29:00	23.27023	-25.56615	0.336657267890954	1346.62907156382
KKR	2016-03-14 11:29:00	23.26685	-25.55017	0.455823166435743	1823.29266574297
KKR	2016-03-14 15:29:00	23.26043	-25.54937	0.164684714112635	658.738856450542
KKR	2016-03-14 19:29:00	23.25555	-25.54927	0.124050178217561	496.200712870244
KKR	2016-03-14 23:29:00	23.25622	-25.5527	0.097586739605261	390.346958421044
KKR	2016-03-15 03:30:00	23.25738	-25.55382	0.0428733293625419	172.207872939543
KKR	2016-03-15 07:30:00	23.258	-25.55502	0.0371263494647136	148.505397858855
KKR	2016-03-15 11:29:00	23.2554	-25.55597	0.0715288281372634	284.923165413433
KKR	2016-03-15 15:28:00	23.25755	-25.55815	0.0822868589935988	327.775988324502
KKR	2016-03-15 19:29:00	23.27643	-25.56798	0.550863532700141	2212.6351896789
KKR	2016-03-15 23:28:00	23.2725	-25.55503	0.3778393608335	1505.06012065344
KKR	2016-03-16 07:29:00	23.2677	-25.55242	0.0709582774628092	568.848857660187
KKR	2016-03-16 11:28:00	23.26028	-25.55243	0.189350609816372	754.24659576855
KKR	2016-03-16 15:29:00	23.25625	-25.54975	0.126460019563575	507.947745247025
KKR	2016-03-16 19:29:00	23.25377	-25.55168	0.0830396402999662	332.158561199865
KKR	2016-03-17 07:29:00	23.25602	-25.55423	0.0305009131702294	366.010958042753
KKR	2016-03-17 11:29:00	23.2571	-25.56218	0.224399613497522	897.598453990087
KKR	2016-03-17 15:29:00	23.26625	-25.57405	0.405744504933853	1622.97801973541
KKR	2016-03-17 19:28:00	23.2758	-25.56677	0.318295037740995	1267.8752336683
KKR	2016-03-17 23:29:00	23.26905	-25.56802	0.174321450452423	700.191159317232
KKR	2016-03-18 07:29:00	23.26717	-25.56688	0.0287305020296036	229.844016236829
KKR	2016-03-18 15:29:00	23.2599	-25.56322	0.105638278474603	845.106227796821
KKR	2016-03-18 19:29:00	23.2621	-25.56882	0.166541548305642	666.166193222568
KKR	2016-03-18 23:29:00	23.27552	-25.56325	0.374998361939176	1499.9934477567
KKR	2016-03-19 03:29:00	23.26905	-25.55238	0.346054681820252	1384.21872728101
KKR	2016-03-19 07:28:00	23.26678	-25.55443	0.0817384135151964	325.591347168866
KKR	2016-03-19 11:28:00	23.26732	-25.55748	0.0865368567453559	346.147426981424
KKR	2016-03-19 15:29:00	23.26213	-25.55772	0.131508629434767	528.226328229648
KKR	2016-03-19 19:29:00	23.26425	-25.56088	0.103627709665112	414.510838660446
KKR	2016-03-19 23:28:00	23.27737	-25.55538	0.368808758646521	1469.08822194197
KKR	2016-03-20 03:28:00	23.27292	-25.5652	0.297422783551758	1189.69113420703
KKR	2016-03-20 07:28:00	23.2411	-25.56278	0.811400165608315	3245.60066243326
KKR	2016-03-20 11:29:00	23.25307	-25.5674	0.329189351472273	1322.2438950803
KKR	2016-03-20 15:28:00	23.2556	-25.57067	0.112382086228956	447.65531014534
KKR	2016-03-20 19:29:00	23.27492	-25.567	0.499470597248615	2006.2068989486
KKR	2016-03-20 23:28:00	23.27503	-25.5352	0.89455212518014	3563.29929863422
KKR	2016-03-21 03:28:00	23.23615	-25.55102	1.08297668417519	4331.90673670074
KKR	2016-03-21 07:28:00	23.25903	-25.49502	1.67318638180926	6692.74552723703
KKR	2016-03-21 11:29:00	23.26743	-25.49927	0.243496953979674	978.046098485022
KKR	2016-03-21 15:29:00	23.26257	-25.4984	0.125941847447957	503.767389791826
KKR	2016-03-21 19:28:00	23.2885	-25.5131	0.780496010388545	3108.97577471437
KKR	2016-03-22 01:17:00	23.27008	-25.54885	0.760222959565354	4421.96354813848
KKR	2016-03-22 05:17:00	23.2352	-25.55355	0.896150727915659	3584.60291166263
KKR	2016-03-22 09:18:00	23.23652	-25.4851	1.91002711742353	7671.9422549845
KKR	2016-03-22 13:17:00	23.23472	-25.47858	0.189100254825446	753.249348388028
KKR	2016-03-22 17:18:00	23.25007	-25.48958	0.495256470389517	1989.28015606456
KKR	2016-03-22 21:16:00	23.26698	-25.51793	0.910689828272378	3612.40298548043
KKR	2016-03-23 01:16:00	23.27158	-25.56588	1.34833114883446	5393.32459533786
KKR	2016-03-23 05:16:00	23.26508	-25.57082	0.215471929591867	861.887718367467
KKR	2016-03-23 09:16:00	23.26078	-25.57195	0.113750354948446	455.001419793784
KKR	2016-03-23 14:20:00	23.26765	-25.57077	0.140256910711188	710.635014270019
KKR	2016-03-23 15:19:00	23.2679	-25.57107	0.0428526499917113	42.1384391585161
KKR	2016-03-23 16:21:00	23.2685	-25.57167	0.0878397121125183	90.7677025162689
KKR	2016-03-23 17:21:00	23.27112	-25.57077	0.284735400559315	284.735400559315
KKR	2016-03-23 18:19:00	23.27283	-25.56812	0.355926338270821	344.062126995127
KKR	2016-03-23 19:19:00	23.27268	-25.566	0.238041851500196	238.041851500196
KKR	2016-03-23 20:19:00	23.26513	-25.56427	0.791475448343555	791.475448343555
KKR	2016-03-23 21:19:00	23.26273	-25.56425	0.243946677038589	243.946677038589
KKR	2016-03-23 22:19:00	23.26098	-25.56423	0.177885326844315	177.885326844315
KKR	2016-03-23 23:20:00	23.26035	-25.56473	0.0836903489335059	85.0851880823976
KKR	2016-03-24 00:19:00	23.2583	-25.5645	0.213510468016175	209.951960215906
KKR	2016-03-24 01:19:00	23.25758	-25.56397	0.0942487656310071	94.2487656310071
KKR	2016-03-24 03:20:00	23.2556	-25.56115	0.18577586356914	374.647991531098
KKR	2016-03-24 04:19:00	23.25607	-25.56007	0.13231590653321	130.110641424323
KKR	2016-03-24 05:20:00	23.25673	-25.55983	0.0710912768874984	72.27613150229
KKR	2016-03-24 06:20:00	23.25687	-25.55965	0.0246850127350299	24.6850127350299
KKR	2016-03-24 07:19:00	23.25787	-25.55953	0.104269242956158	102.531422240222
KKR	2016-03-24 08:19:00	23.26073	-25.55795	0.340378906274469	340.378906274469
KKR	2016-03-24 09:20:00	23.26237	-25.55843	0.172290572483207	175.162082024594
KKR	2016-03-24 11:20:00	23.26488	-25.55775	0.133133061792189	266.266123584377
KKR	2016-03-24 12:19:00	23.26512	-25.55795	0.0336880319221438	33.1265647234414
KKR	2016-03-24 13:19:00	23.26507	-25.5583	0.0395473579196318	39.5473579196318
KKR	2016-03-24 14:19:00	23.2658	-25.55768	0.101648791787567	101.648791787567
KKR	2016-03-24 15:19:00	23.26422	-25.55545	0.297043470458392	297.043470458392
KKR	2016-03-24 16:20:00	23.26305	-25.55435	0.168473761657234	171.281657684854
KKR	2016-03-24 17:20:00	23.26423	-25.55322	0.174414803906478	174.414803906478
KKR	2016-03-24 18:20:00	23.26523	-25.55268	0.118296814004469	118.296814004469
KKR	2016-03-24 19:19:00	23.26567	-25.55233	0.0604941620441148	59.4859260100463
KKR	2016-03-24 20:20:00	23.26705	-25.55408	0.237151567757265	241.104093886553
KKR	2016-03-24 21:19:00	23.27027	-25.55685	0.458721058731848	451.075707752984
KKR	2016-03-24 22:19:00	23.27247	-25.56368	0.797325795754405	797.325795754405
KKR	2016-03-24 23:19:00	23.27495	-25.56505	0.295128972155166	295.128972155166
KKR	2016-03-25 00:20:00	23.27235	-25.56447	0.267670389637501	272.131562798126
KKR	2016-03-25 01:20:00	23.27102	-25.56393	0.148103613876749	148.103613876749
KKR	2016-03-25 02:19:00	23.2697	-25.56365	0.140118577960446	137.783268327772
KKR	2016-03-25 04:20:00	23.26947	-25.56297	0.0395218025662074	79.7023018418517
KKR	2016-03-25 05:19:00	23.26467	-25.56325	0.497167774664917	488.881645087168
KKR	2016-03-25 06:19:00	23.26188	-25.56228	0.303697429552407	303.697429552407
KKR	2016-03-25 07:19:00	23.25922	-25.5606	0.329455367828926	329.455367828926
KKR	2016-03-25 08:19:00	23.25728	-25.5601	0.204996541836719	204.996541836719
KKR	2016-03-25 09:19:00	23.2562	-25.55935	0.138254804773131	138.254804773131
KKR	2016-03-25 10:20:00	23.25657	-25.55855	0.0956221351707253	97.2158374235707
KKR	2016-03-25 12:22:00	23.25822	-25.55787	0.0905979834824881	184.215899747726
KKR	2016-03-25 13:49:00	23.25798	-25.55875	0.070057448628379	101.583300511149
KKR	2016-03-25 14:46:00	23.25657	-25.5587	0.150980179545386	143.431170568117
KKR	2016-03-25 15:46:00	23.25648	-25.55923	0.0600911060158441	60.0911060158441
KKR	2016-03-25 16:46:00	23.2577	-25.5601	0.157741247987117	157.741247987117
KKR	2016-03-25 19:11:00	23.2587	-25.56247	0.11766733170981	284.362718298706
KKR	2016-03-25 20:08:00	23.25812	-25.5626	0.0639222263030927	60.7261149879381
KKR	2016-03-25 21:09:00	23.25762	-25.56285	0.0570799441027225	58.0312765044346
KKR	2016-03-25 22:08:00	23.25755	-25.56303	0.0217509855185517	21.3884690932425
KKR	2016-03-25 23:09:00	23.25802	-25.5627	0.0594217509983154	60.412113514954
KKR	2016-03-26 00:08:00	23.25902	-25.56322	0.11914630950925	117.160537684096
KKR	2016-03-26 01:08:00	23.2592	-25.56348	0.034403024920386	34.403024920386
KKR	2016-03-26 02:09:00	23.25922	-25.56353	0.005862527873905	5.96023667180341
KKR	2016-03-26 03:08:00	23.25922	-25.56348	0.00569781851272849	5.60285487084968
KKR	2016-03-26 04:09:00	23.25878	-25.56335	0.0462641791297268	47.035248781889
KKR	2016-03-26 05:08:00	23.25917	-25.56347	0.0425685431899585	41.8590674701259
KKR	2016-03-26 06:15:00	23.26025	-25.56255	0.134859556191819	150.593171080864
KKR	2016-03-26 07:15:00	23.2617	-25.5627	0.148336729626408	148.336729626408
KKR	2016-03-26 08:16:00	23.26347	-25.56303	0.180655917203058	183.666849156442
KKR	2016-03-26 09:15:00	23.26432	-25.5628	0.0916854979954978	90.1574063622395
KKR	2016-03-26 10:15:00	23.26505	-25.5612	0.194036010089392	194.036010089392
KKR	2016-03-26 11:15:00	23.26507	-25.55945	0.196107705925934	196.107705925934
KKR	2016-03-26 12:16:00	23.26473	-25.5572	0.250310753900332	254.48259979867
KKR	2016-03-26 13:15:00	23.26398	-25.55673	0.0942282746464921	92.6578034023839
KKR	2016-03-26 14:14:00	23.25855	-25.55337	0.679465035793952	668.140618530719
KKR	2016-03-26 15:15:00	23.25943	-25.55085	0.291358180514378	296.214150189617
KKR	2016-03-26 16:15:00	23.26148	-25.5505	0.212046752473789	212.046752473789
KKR	2016-03-26 17:15:00	23.26272	-25.55065	0.127164778669509	127.164778669509
KKR	2016-03-26 18:15:00	23.26245	-25.55207	0.161469568902913	161.469568902913
KKR	2016-03-26 19:15:00	23.26307	-25.55378	0.20171428506247	201.71428506247
KKR	2016-03-26 20:15:00	23.26485	-25.55503	0.228816300692551	228.816300692551
KKR	2016-03-26 23:14:00	23.2685	-25.56118	0.262343986760883	782.659560503301
KKR	2016-03-27 00:14:00	23.27505	-25.56538	0.815286778835191	815.286778835191
KKR	2016-03-27 01:14:00	23.27322	-25.5653	0.186211055313529	186.211055313529
KKR	2016-03-27 02:14:00	23.27253	-25.5649	0.0832293513978172	83.2293513978172
KKR	2016-03-27 03:15:00	23.27222	-25.56485	0.0314772712185148	32.0018924054901
KKR	2016-03-27 05:15:00	23.2714	-25.5649	0.0417655006418282	83.5310012836564
KKR	2016-03-27 06:15:00	23.2719	-25.56512	0.0564824066900357	56.4824066900357
KKR	2016-03-27 07:15:00	23.26842	-25.56518	0.353763601941528	353.763601941528
KKR	2016-03-27 08:15:00	23.26833	-25.56578	0.0678521771735856	67.8521771735856
KKR	2016-03-27 09:15:00	23.26617	-25.56603	0.221317999061737	221.317999061737
KKR	2016-03-27 10:14:00	23.26533	-25.56537	0.114868796562758	112.954316620046
KKR	2016-03-27 11:15:00	23.25867	-25.56882	0.766748106562249	779.52724167162
KKR	2016-03-27 12:15:00	23.25698	-25.57103	0.30138448733353	301.38448733353
KKR	2016-03-27 13:15:00	23.25645	-25.57245	0.167992358448083	167.992358448083
KKR	2016-03-27 14:15:00	23.25718	-25.57352	0.141000138081631	141.000138081631
KKR	2016-03-27 15:15:00	23.25695	-25.57482	0.147538453789406	147.538453789406
KKR	2016-03-27 16:15:00	23.25405	-25.57475	0.294840492003717	294.840492003717
KKR	2016-03-27 17:14:00	23.24932	-25.5741	0.494458492752099	486.217517872898
KKR	2016-03-27 18:14:00	23.25098	-25.57028	0.460116353527333	460.116353527333
KKR	2016-03-27 19:15:00	23.256	-25.56815	0.554059646441559	563.293973882251
KKR	2016-03-27 20:15:00	23.25702	-25.56745	0.130002812622925	130.002812622925
KKR	2016-03-27 21:14:00	23.25698	-25.56617	0.145923496048206	143.491437780736
KKR	2016-03-27 22:14:00	23.25832	-25.56797	0.243380007409822	243.380007409822
KKR	2016-03-27 23:15:00	23.25857	-25.56893	0.108723093085805	110.535144637235
KKR	2016-03-28 00:14:00	23.25993	-25.57055	0.232034670920093	228.167426404758
KKR	2016-03-28 01:15:00	23.26065	-25.57058	0.0720539166531757	73.254815264062
KKR	2016-03-28 03:15:00	23.26213	-25.57118	0.0823810335474992	164.762067094998
KKR	2016-03-28 04:15:00	23.26197	-25.57122	0.0168679653920703	16.8679653920703
KKR	2016-03-28 05:17:00	23.26233	-25.57115	0.0362127275496311	37.4198184679522
KKR	2016-03-28 06:14:00	23.26248	-25.57127	0.0213979656945341	20.3280674098074
KKR	2016-03-28 07:15:00	23.26347	-25.57142	0.10033987316087	102.012204380218
KKR	2016-03-28 08:15:00	23.26707	-25.57163	0.366636706444352	366.636706444352
KKR	2016-03-28 09:15:00	23.26845	-25.57215	0.151875337705056	151.875337705056
KKR	2016-03-28 10:15:00	23.27055	-25.57212	0.213453614029429	213.453614029429
KKR	2016-03-28 11:15:00	23.27395	-25.56705	0.664949511441451	664.94951144145
KKR	2016-03-28 12:15:00	23.27362	-25.56415	0.326680337287955	326.680337287955
KKR	2016-03-28 13:14:00	23.2693	-25.56312	0.461690154460466	453.995318552792
KKR	2016-03-28 14:15:00	23.26643	-25.56068	0.393258025962665	399.812326395376
KKR	2016-03-28 15:15:00	23.2614	-25.5594	0.531006526413864	531.006526413864
KKR	2016-03-28 16:15:00	23.26063	-25.5572	0.258650692046954	258.650692046954
KKR	2016-03-28 17:14:00	23.25885	-25.55472	0.337232250938974	331.611713423324
KKR	2016-03-28 18:15:00	23.25833	-25.551	0.413302931864413	420.191314062153
KKR	2016-03-28 19:15:00	23.25972	-25.55017	0.16916117965121	169.16117965121
KKR	2016-03-28 20:15:00	23.2604	-25.54903	0.145247986958717	145.247986958717
KKR	2016-03-28 21:15:00	23.26217	-25.5496	0.190927814575931	190.927814575931
KKR	2016-03-28 22:15:00	23.26303	-25.5486	0.142123998033868	142.123998033868
KKR	2016-03-28 23:15:00	23.26468	-25.54833	0.170435696409179	170.435696409179
KKR	2016-03-29 00:16:00	23.26533	-25.54887	0.0881266143570932	89.5953912630448
KKR	2016-03-29 01:15:00	23.26545	-25.54938	0.0594261207338141	58.4356853882505
KKR	2016-03-29 02:14:00	23.26577	-25.54997	0.074930666842244	73.6818223948733
KKR	2016-03-29 03:15:00	23.26498	-25.55093	0.132041203482395	134.241890207102
KKR	2016-03-29 04:14:00	23.2653	-25.55148	0.0708691781984922	69.6880252285173
KKR	2016-03-29 05:14:00	23.26542	-25.55228	0.0904705021366396	90.4705021366396
KKR	2016-03-29 06:15:00	23.26588	-25.55287	0.0796495757670131	80.9770686964633
KKR	2016-03-29 07:14:00	23.26618	-25.55662	0.428453297497384	421.312409205761
KKR	2016-03-29 08:14:00	23.26668	-25.55873	0.241836957379102	241.836957379102
KKR	2016-03-29 09:15:00	23.26613	-25.56005	0.155532632920066	158.124843468734
KKR	2016-03-29 13:27:00	23.26655	-25.56292	0.0772426933666972	324.419312140128
KKR	2016-03-29 15:24:00	23.26502	-25.56432	0.113278508787791	220.893092136193
KKR	2016-03-29 16:24:00	23.2662	-25.56492	0.137493983450748	137.493983450748
KKR	2016-03-29 17:24:00	23.26783	-25.56453	0.171338497918144	171.338497918144
KKR	2016-03-29 18:24:00	23.2754	-25.56515	0.772528008817738	772.528008817738
KKR	2016-03-29 19:25:00	23.27437	-25.56305	0.253325065849206	257.547150280026
KKR	2016-03-29 20:24:00	23.2721	-25.56025	0.396051347214247	389.450491427343
KKR	2016-03-29 21:24:00	23.27088	-25.55987	0.131110151584793	131.110151584793
KKR	2016-03-29 22:24:00	23.27073	-25.55672	0.353299144256824	353.299144256824
KKR	2016-03-29 23:24:00	23.27048	-25.5523	0.495930399256622	495.930399256622
KKR	2016-03-30 00:24:00	23.27102	-25.5501	0.252556067136134	252.556067136134
KKR	2016-03-30 01:25:00	23.27017	-25.54943	0.112587448816641	114.463906296919
KKR	2016-03-30 02:27:00	23.2688	-25.54985	0.142257864117998	146.999792921931
KKR	2016-03-30 03:24:00	23.26717	-25.55013	0.177511969291155	168.636370826597
KKR	2016-03-30 04:24:00	23.267	-25.55095	0.0934959946238732	93.4959946238732
KKR	2016-03-30 05:24:00	23.26617	-25.5506	0.0930404683677035	93.0404683677035
KKR	2016-03-30 06:24:00	23.26498	-25.55105	0.131054326328512	131.054326328512
KKR	2016-03-30 07:24:00	23.26345	-25.55237	0.21463171147235	214.63171147235
KKR	2016-03-30 08:24:00	23.26102	-25.55335	0.270321279897387	270.321279897387
KKR	2016-03-30 09:24:00	23.25957	-25.55463	0.205663533205533	205.663533205533
KKR	2016-03-30 10:25:00	23.25707	-25.55567	0.274988467213857	279.571608334088
KKR	2016-03-30 11:25:00	23.25667	-25.55605	0.0588764135073146	58.8764135073146
KKR	2016-03-30 12:24:00	23.25452	-25.55637	0.225221709046402	221.468013895628
KKR	2016-03-30 13:25:00	23.25368	-25.55707	0.114045901171533	115.946666191058
KKR	2016-03-30 14:24:00	23.24977	-25.5568	0.405355491724217	398.599566862146
KKR	2016-03-30 15:25:00	23.24807	-25.55648	0.173593944624673	176.487177035084
KKR	2016-03-30 16:24:00	23.24798	-25.55697	0.0566099106608838	55.6664121498691
KKR	2016-03-30 17:24:00	23.24823	-25.55715	0.0324447460715387	32.4447460715387
KKR	2016-03-30 18:25:00	23.24617	-25.55935	0.318156806806475	323.459420253249
KKR	2016-03-30 19:25:00	23.24855	-25.55925	0.242182956525558	242.182956525558
KKR	2016-03-30 20:25:00	23.2499	-25.55928	0.137266138320882	137.266138320882
KKR	2016-03-30 23:24:00	23.25088	-25.55957	0.0351223005064974	104.781529844384
KKR	2016-03-31 00:25:00	23.2526	-25.56158	0.280455037609129	285.129288235948
KKR	2016-03-31 01:24:00	23.2576	-25.56695	0.80099538646509	787.645463357339
KKR	2016-03-31 02:24:00	23.26747	-25.56732	1.00402367314907	1004.02367314907
KKR	2016-03-31 03:24:00	23.27505	-25.56537	0.800792254426539	800.792254426539
KKR	2016-03-31 04:24:00	23.2731	-25.56523	0.198811542531496	198.811542531496
KKR	2016-03-31 05:24:00	23.27283	-25.56505	0.0340569812770032	34.0569812770032
KKR	2016-03-31 06:24:00	23.27177	-25.56548	0.118019193419121	118.019193419121
KKR	2016-03-31 07:24:00	23.2711	-25.56657	0.139839140726823	139.839140726823
KKR	2016-03-31 08:25:00	23.27112	-25.56745	0.0970114582017994	98.628315838496
KKR	2016-03-31 09:24:00	23.26118	-25.56585	1.04345340219192	1026.06251215539
KKR	2016-03-31 10:24:00	23.26048	-25.56103	0.544779178011825	544.779178011825
KKR	2016-03-31 11:24:00	23.25655	-25.55963	0.42916576662763	429.16576662763
KKR	2016-03-31 12:25:00	23.25548	-25.55897	0.129369225845839	131.525379609937
KKR	2016-03-31 13:25:00	23.25553	-25.55895	0.00555454817690979	5.55454817690979
KKR	2016-03-31 14:25:00	23.25342	-25.55805	0.23700480698803	237.00480698803
KKR	2016-03-31 15:25:00	23.25003	-25.55727	0.355502353524819	355.502353524819
KKR	2016-03-31 16:25:00	23.25142	-25.55605	0.196606652621684	196.606652621684
KKR	2016-03-31 17:24:00	23.25265	-25.55467	0.202233941516768	198.863375824822
KKR	2016-03-31 18:25:00	23.25477	-25.55227	0.338981128934785	344.630814417032
KKR	2016-03-31 19:25:00	23.25515	-25.55122	0.123839865130455	123.839865130455
KKR	2016-03-31 20:24:00	23.25627	-25.55138	0.117208378798904	115.254905818922
KKR	2016-03-31 21:24:00	23.2573	-25.5529	0.199935254397838	199.935254397838
KKR	2016-03-31 22:24:00	23.25822	-25.55313	0.09700576462906	97.00576462906
KKR	2016-03-31 23:24:00	23.25902	-25.55322	0.0819438231929326	81.9438231929326
KKR	2016-04-01 00:25:00	23.25953	-25.55403	0.102814356888122	104.527929502924
KKR	2016-04-01 01:24:00	23.26008	-25.55428	0.0635934139481275	62.5335237156587
KKR	2016-04-01 03:25:00	23.2596	-25.55362	0.0439350944374593	88.6024404488762
KKR	2016-04-01 04:24:00	23.26085	-25.55397	0.135231752047064	132.977889512946
KKR	2016-04-01 05:24:00	23.25798	-25.55558	0.343011942970913	343.011942970913
KKR	2016-04-01 06:24:00	23.25677	-25.55725	0.223936819537271	223.936819537271
[truncated: 30,510 more rows]

## Sheet: Home Range sizes
ID	Area	Column1
KKR2015w	73.1008	7310.08
KKR2016d	82.7056	8270.56
KKR2016f	20.6813	2068.13
KKR2016s	33.3186	3331.86
KKR2020s	44.1191	4411.91
KKR2020w	54.6061	5460.61
KKR2021d	35.872	3587.2
KKR2021f	40.6448	4064.48
SPGR2016d	38.7786	3877.86
SPGR2016s	31.7278	3172.78
SPGR2016w	59.6477	5964.77
SPGR2017f	49.2905	4929.05
SPGR2021d	41.3151	4131.51
SPGR2021f	53.5746	5357.46
SPGR2021s	49.9444	4994.44
SPGR2021w	60.541	6054.1

## Sheet: KKR-Daily distance travelled
animal	timestamp	Day	Month	Season	Date	Phase	Time	Time.rounded.to.nearest.hour	lon	lat	speed	total_dist
KKR	12/12/2015 00:49	12	12	Wet	2015-12-12	1	00:49:00	01:00:00	23.2834	-25.5337	0.710948	20943.3
KKR	13/12/2015 00:06	13	12	Wet	2015-12-13	1	00:06:00	00:00:00	23.1923	-25.5171	0.0376687	17882.1
KKR	14/12/2015 00:06	14	12	Wet	2015-12-14	1	00:06:00	00:00:00	23.317	-25.5289	0.425387	15000
KKR	15/12/2015 00:07	15	12	Wet	2015-12-15	1	00:07:00	00:00:00	23.2302	-25.4847	0.214267	13593.5
KKR	16/12/2015 00:10	16	12	Wet	2015-12-16	1	00:10:00	00:00:00	23.3177	-25.5202	0.604529	25463.5
KKR	17/12/2015 00:16	17	12	Wet	2015-12-17	1	00:16:00	00:00:00	23.3417	-25.4118	2.35646	25908.8
KKR	18/12/2015 00:18	18	12	Wet	2015-12-18	1	00:18:00	00:00:00	23.2814	-25.5198	1.95308	10918.6
KKR	19/12/2015 00:23	19	12	Wet	2015-12-19	1	00:23:00	00:00:00	23.2704	-25.4996	1.26861	20071.7
KKR	20/12/2015 00:23	20	12	Wet	2015-12-20	1	00:23:00	00:00:00	23.2448	-25.5051	0.324771	11706.8
KKR	21/12/2015 00:34	21	12	Wet	2015-12-21	1	00:34:00	01:00:00	23.3172	-25.529	0.417428	17122.4
KKR	22/12/2015 01:41	22	12	Wet	2015-12-22	1	01:41:00	02:00:00	23.2505	-25.4923	0.223403	12248.3
KKR	23/12/2015 00:39	23	12	Wet	2015-12-23	1	00:39:00	01:00:00	23.318	-25.5219	0.651355	9839.03
KKR	24/12/2015 00:22	24	12	Wet	2015-12-24	1	00:22:00	00:00:00	23.2513	-25.4871	0.187428	12289.2
KKR	25/12/2015 00:22	25	12	Wet	2015-12-25	1	00:22:00	00:00:00	23.3145	-25.5272	0.336695	13812.3
KKR	26/12/2015 00:22	26	12	Wet	2015-12-26	1	00:22:00	00:00:00	23.2417	-25.4944	0.191589	11028.6
KKR	27/12/2015 00:22	27	12	Wet	2015-12-27	1	00:22:00	00:00:00	23.3149	-25.5264	0.130126	10874.8
KKR	28/12/2015 00:23	28	12	Wet	2015-12-28	1	00:23:00	00:00:00	23.2489	-25.4916	0.0386831	8918.64
KKR	29/12/2015 00:22	29	12	Wet	2015-12-29	1	00:22:00	00:00:00	23.3178	-25.5238	0.1172	9068.25
KKR	30/12/2015 00:23	30	12	Wet	2015-12-30	1	00:23:00	00:00:00	23.2627	-25.4871	0.128044	10540.9
KKR	31/12/2015 00:24	31	12	Wet	2015-12-31	1	00:24:00	00:00:00	23.3116	-25.5311	0.408042	10989
KKR	01/01/2016 00:26	1	1	Wet	2016-01-01	1	00:26:00	00:00:00	23.2424	-25.4942	0.0629042	10545.7
KKR	02/01/2016 00:23	2	1	Wet	2016-01-02	1	00:23:00	00:00:00	23.3207	-25.5308	0.43639	21951.6
KKR	03/01/2016 00:27	3	1	Wet	2016-01-03	1	00:27:00	00:00:00	23.2559	-25.509	0.608221	6743.24
KKR	04/01/2016 01:28	4	1	Wet	2016-01-04	1	01:28:00	01:00:00	23.2489	-25.4878	0.0274898	9564.7
KKR	05/01/2016 00:27	5	1	Wet	2016-01-05	1	00:27:00	00:00:00	23.3019	-25.5226	0.804315	10315.8
KKR	06/01/2016 02:39	6	1	Wet	2016-01-06	1	02:39:00	03:00:00	23.2517	-25.5007	0.242627	12782.9
KKR	07/01/2016 00:15	7	1	Wet	2016-01-07	1	00:15:00	00:00:00	23.3128	-25.5301	0.174185	14346.4
KKR	08/01/2016 00:15	8	1	Wet	2016-01-08	1	00:15:00	00:00:00	23.2374	-25.528	1.53373	18270
KKR	09/01/2016 00:15	9	1	Wet	2016-01-09	1	00:15:00	00:00:00	23.2682	-25.4966	0.521887	21943.5
KKR	10/01/2016 00:29	10	1	Wet	2016-01-10	1	00:29:00	00:00:00	23.306	-25.537	1.22927	17568.9
KKR	11/01/2016 00:28	11	1	Wet	2016-01-11	1	00:28:00	00:00:00	23.2408	-25.4938	0.0612967	12072.5
KKR	12/01/2016 00:51	12	1	Wet	2016-01-12	1	00:51:00	01:00:00	23.306	-25.5245	0.408298	10258.3
KKR	13/01/2016 00:51	13	1	Wet	2016-01-13	1	00:51:00	01:00:00	23.2391	-25.4965	0.116286	10592.4
KKR	14/01/2016 00:51	14	1	Wet	2016-01-14	1	00:51:00	01:00:00	23.3108	-25.5245	0.204645	10226.1
KKR	15/01/2016 00:51	15	1	Wet	2016-01-15	1	00:51:00	01:00:00	23.2427	-25.4886	0.13854	8828.49
KKR	16/01/2016 00:04	16	1	Wet	2016-01-16	1	00:04:00	00:00:00	23.3172	-25.5288	1.63046	11899.4
KKR	17/01/2016 00:04	17	1	Wet	2016-01-17	1	00:04:00	00:00:00	23.2445	-25.485	0.10152	10875.9
KKR	18/01/2016 00:04	18	1	Wet	2016-01-18	1	00:04:00	00:00:00	23.311	-25.5267	0.666772	11631.1
KKR	19/01/2016 00:05	19	1	Wet	2016-01-19	1	00:05:00	00:00:00	23.2483	-25.487	0.538642	10527.1
KKR	20/01/2016 00:05	20	1	Wet	2016-01-20	1	00:05:00	00:00:00	23.305	-25.5255	0.112516	12389.6
KKR	21/01/2016 03:36	21	1	Wet	2016-01-21	1	03:36:00	04:00:00	23.2469	-25.5037	0.0663756	9910.63
KKR	22/01/2016 00:35	22	1	Wet	2016-01-22	1	00:35:00	01:00:00	23.3089	-25.5293	0.373337	8913.16
KKR	23/01/2016 01:35	23	1	Wet	2016-01-23	1	01:35:00	02:00:00	23.2627	-25.4824	0.0384516	3663.48
KKR	24/01/2016 00:16	24	1	Wet	2016-01-24	1	00:16:00	00:00:00	23.255	-25.4893	0.0168733	9584.34
KKR	25/01/2016 00:20	25	1	Wet	2016-01-25	1	00:20:00	00:00:00	23.3084	-25.5191	0.236012	9227.07
KKR	26/01/2016 02:26	26	1	Wet	2016-01-26	1	02:26:00	02:00:00	23.2617	-25.4913	0.141415	9031.02
KKR	27/01/2016 00:24	27	1	Wet	2016-01-27	1	00:24:00	00:00:00	23.305	-25.5197	0.285985	9924.06
KKR	28/01/2016 00:14	28	1	Wet	2016-01-28	1	00:14:00	00:00:00	23.2529	-25.4772	0.7122	14596.8
KKR	29/01/2016 00:13	29	1	Wet	2016-01-29	1	00:13:00	00:00:00	23.317	-25.5282	0.0863678	18467.6
KKR	30/01/2016 00:13	30	1	Wet	2016-01-30	1	00:13:00	00:00:00	23.3036	-25.5204	1.47162	16041.6
KKR	31/01/2016 00:13	31	1	Wet	2016-01-31	1	00:13:00	00:00:00	23.2578	-25.5018	0.57287	14735.5
KKR	01/02/2016 00:13	1	2	Wet	2016-02-01	1	00:13:00	00:00:00	23.3159	-25.5263	0.31406	19934.9
KKR	02/02/2016 00:14	2	2	Wet	2016-02-02	1	00:14:00	00:00:00	23.2549	-25.5102	0.919205	22221.4
KKR	03/02/2016 00:13	3	2	Wet	2016-02-03	1	00:13:00	00:00:00	23.2615	-25.5101	0.283769	10797
KKR	04/02/2016 00:35	4	2	Wet	2016-02-04	1	00:35:00	01:00:00	23.3156	-25.5234	0.543493	16966
KKR	05/02/2016 00:34	5	2	Wet	2016-02-05	1	00:34:00	01:00:00	23.2552	-25.5109	0.242479	9220.4
KKR	06/02/2016 00:38	6	2	Wet	2016-02-06	1	00:38:00	01:00:00	23.3123	-25.5156	0.663019	23062.4
KKR	07/02/2016 00:06	7	2	Wet	2016-02-07	1	00:06:00	00:00:00	23.3067	-25.4291	0.937626	27119.9
KKR	08/02/2016 00:04	8	2	Wet	2016-02-08	1	00:04:00	00:00:00	23.2708	-25.5589	1.18543	13493.8
KKR	09/02/2016 00:04	9	2	Wet	2016-02-09	1	00:04:00	00:00:00	23.2801	-25.5095	1.6381	14958.3
KKR	10/02/2016 00:04	10	2	Wet	2016-02-10	1	00:04:00	00:00:00	23.2528	-25.5488	0.181001	7194.69
KKR	11/02/2016 01:06	11	2	Wet	2016-02-11	1	01:06:00	01:00:00	23.2612	-25.5585	0.0166403	5148.91
KKR	12/02/2016 00:18	12	2	Wet	2016-02-12	1	00:18:00	00:00:00	23.253	-25.5608	0.418667	4022.52
KKR	13/02/2016 00:52	13	2	Wet	2016-02-13	1	00:52:00	01:00:00	23.2602	-25.5558	0.14476	5233.69
KKR	14/02/2016 00:43	14	2	Wet	2016-02-14	1	00:43:00	01:00:00	23.3056	-25.5236	1.33434	16228.4
KKR	15/02/2016 00:05	15	2	Wet	2016-02-15	1	00:05:00	00:00:00	23.2327	-25.4772	0.0197147	10912.7
KKR	16/02/2016 00:10	16	2	Wet	2016-02-16	1	00:10:00	00:00:00	23.31	-25.5337	0.417917	11666
KKR	17/02/2016 00:53	17	2	Wet	2016-02-17	1	00:53:00	01:00:00	23.256	-25.5715	0.0991735	14582.8
KKR	18/02/2016 00:53	18	2	Wet	2016-02-18	1	00:53:00	01:00:00	23.3071	-25.5186	1.2314	15346.5
KKR	19/02/2016 00:23	19	2	Wet	2016-02-19	1	00:23:00	00:00:00	23.2649	-25.5352	0.995219	11668.8
KKR	20/02/2016 00:22	20	2	Wet	2016-02-20	1	00:22:00	00:00:00	23.2767	-25.5678	0.0153653	12124.3
KKR	21/02/2016 00:55	21	2	Wet	2016-02-21	1	00:55:00	01:00:00	23.2668	-25.5676	0.432668	4967.33
KKR	22/02/2016 00:54	22	2	Wet	2016-02-22	1	00:54:00	01:00:00	23.2573	-25.5659	0.090403	7666.17
KKR	23/02/2016 00:23	23	2	Wet	2016-02-23	1	00:23:00	00:00:00	23.2638	-25.5608	0.41942	9980.85
KKR	24/02/2016 00:24	24	2	Wet	2016-02-24	1	00:24:00	00:00:00	23.2676	-25.5648	0.289259	6196.2
KKR	25/02/2016 00:24	25	2	Wet	2016-02-25	1	00:24:00	00:00:00	23.2681	-25.5612	0.623801	6946.36
KKR	26/02/2016 00:24	26	2	Wet	2016-02-26	1	00:24:00	00:00:00	23.2621	-25.5607	0.541667	6158.25
KKR	27/02/2016 00:55	27	2	Wet	2016-02-27	1	00:55:00	01:00:00	23.2754	-25.5721	0.446063	6983.36
KKR	28/02/2016 00:55	28	2	Wet	2016-02-28	1	00:55:00	01:00:00	23.2614	-25.5515	0.10728	10909.8
KKR	29/02/2016 00:48	29	2	Wet	2016-02-29	1	00:48:00	01:00:00	23.3115	-25.5279	0.418293	7220.4
KKR	01/03/2016 01:07	1	3	Fall	2016-03-01	1	01:07:00	01:00:00	23.2654	-25.5537	0.105844	6999.17
KKR	02/03/2016 03:48	2	3	Fall	2016-03-02	1	03:48:00	04:00:00	23.2664	-25.5576	0.114328	6040.57
KKR	03/03/2016 03:47	3	3	Fall	2016-03-03	1	03:47:00	04:00:00	23.2636	-25.5503	0.0706095	7708.97
KKR	04/03/2016 03:47	4	3	Fall	2016-03-04	1	03:47:00	04:00:00	23.2703	-25.563	0.154942	6584.77
KKR	05/03/2016 03:47	5	3	Fall	2016-03-05	1	03:47:00	04:00:00	23.2678	-25.5621	0.100559	2661.89
KKR	06/03/2016 03:33	6	3	Fall	2016-03-06	1	03:33:00	04:00:00	23.2637	-25.556	0.112112	5834.4
KKR	07/03/2016 03:33	7	3	Fall	2016-03-07	1	03:33:00	04:00:00	23.2702	-25.5669	0.211463	6490.2
KKR	08/03/2016 03:33	8	3	Fall	2016-03-08	1	03:33:00	04:00:00	23.2623	-25.5492	0.0673598	4505.68
KKR	09/03/2016 03:32	9	3	Fall	2016-03-09	1	03:32:00	04:00:00	23.2669	-25.5557	0.212831	3405.85
KKR	10/03/2016 03:33	10	3	Fall	2016-03-10	1	03:33:00	04:00:00	23.2586	-25.5495	0.0340747	4566.87
KKR	11/03/2016 03:33	11	3	Fall	2016-03-11	1	03:33:00	04:00:00	23.2596	-25.5497	0.0683738	4505.99
KKR	12/03/2016 03:33	12	3	Fall	2016-03-12	1	03:33:00	04:00:00	23.2706	-25.5483	0.0617105	2869.49
KKR	13/03/2016 03:32	13	3	Fall	2016-03-13	1	03:32:00	04:00:00	23.2765	-25.5608	0.188635	5035.07
KKR	14/03/2016 03:29	14	3	Fall	2016-03-14	1	03:29:00	03:00:00	23.2646	-25.5553	0.0325466	4845.39
KKR	15/03/2016 03:30	15	3	Fall	2016-03-15	1	03:30:00	04:00:00	23.2574	-25.5538	0.0428733	4651.11
KKR	16/03/2016 07:29	16	3	Fall	2016-03-16	1	07:29:00	07:00:00	23.2677	-25.5524	0.0709583	2163.2
KKR	17/03/2016 07:29	17	3	Fall	2016-03-17	1	07:29:00	07:00:00	23.256	-25.5542	0.0305009	4854.65
KKR	18/03/2016 07:29	18	3	Fall	2016-03-18	1	07:29:00	07:00:00	23.2672	-25.5669	0.0287305	3241.11
KKR	19/03/2016 03:29	19	3	Fall	2016-03-19	1	03:29:00	03:00:00	23.2691	-25.5524	0.346055	4467.78
KKR	20/03/2016 03:28	20	3	Fall	2016-03-20	1	03:28:00	03:00:00	23.2729	-25.5652	0.297423	11774.7
KKR	21/03/2016 03:28	21	3	Fall	2016-03-21	1	03:28:00	03:00:00	23.2361	-25.551	1.08298	15615.4
KKR	22/03/2016 01:17	22	3	Fall	2016-03-22	1	01:17:00	01:00:00	23.2701	-25.5489	0.760223	22033.4
KKR	23/03/2016 01:16	23	3	Fall	2016-03-23	1	01:16:00	01:00:00	23.2716	-25.5659	1.34833	9718.99
KKR	24/03/2016 00:19	24	3	Fall	2016-03-24	1	00:19:00	00:00:00	23.2583	-25.5645	0.21351	4569.74
KKR	25/03/2016 00:20	25	3	Fall	2016-03-25	1	00:20:00	00:00:00	23.2723	-25.5645	0.26767	3332.21
KKR	26/03/2016 00:08	26	3	Fall	2016-03-26	1	00:08:00	00:00:00	23.259	-25.5632	0.119146	4240.29
KKR	27/03/2016 00:14	27	3	Fall	2016-03-27	1	00:14:00	00:00:00	23.2751	-25.5654	0.815287	5795.74
KKR	28/03/2016 00:14	28	3	Fall	2016-03-28	1	00:14:00	00:00:00	23.2599	-25.5706	0.232035	5579.57
KKR	29/03/2016 00:16	29	3	Fall	2016-03-29	1	00:16:00	00:00:00	23.2653	-25.5489	0.0881266	4672.37
KKR	30/03/2016 00:24	30	3	Fall	2016-03-30	1	00:24:00	00:00:00	23.271	-25.5501	0.252556	3837.61
KKR	31/03/2016 00:25	31	3	Fall	2016-03-31	1	00:25:00	00:00:00	23.2526	-25.5616	0.280455	7554.62
KKR	01/04/2016 00:25	1	4	Fall	2016-04-01	1	00:25:00	00:00:00	23.2595	-25.554	0.102814	4424.8
KKR	02/04/2016 00:04	2	4	Fall	2016-04-02	1	00:04:00	00:00:00	23.2766	-25.5538	0.563405	4580.69
KKR	03/04/2016 00:41	3	4	Fall	2016-04-03	1	00:41:00	01:00:00	23.2724	-25.5636	0.418709	3773.78
KKR	04/04/2016 00:39	4	4	Fall	2016-04-04	1	00:39:00	01:00:00	23.264	-25.5565	0.152264	5756.25
KKR	05/04/2016 05:12	5	4	Fall	2016-04-05	1	05:12:00	05:00:00	23.2561	-25.5613	0.0301361	8050.52
KKR	06/04/2016 00:10	6	4	Fall	2016-04-06	1	00:10:00	00:00:00	23.2783	-25.5469	0.342995	5001.89
KKR	07/04/2016 00:11	7	4	Fall	2016-04-07	1	00:11:00	00:00:00	23.2684	-25.5651	0.0445613	4323.1
KKR	08/04/2016 00:10	8	4	Fall	2016-04-08	1	00:10:00	00:00:00	23.2536	-25.5517	0.15267	3332.93
KKR	09/04/2016 00:11	9	4	Fall	2016-04-09	1	00:11:00	00:00:00	23.2578	-25.554	0.0345756	6301.35
KKR	10/04/2016 00:11	10	4	Fall	2016-04-10	1	00:11:00	00:00:00	23.2825	-25.5452	0.0838955	5036.39
KKR	11/04/2016 03:28	11	4	Fall	2016-04-11	1	03:28:00	03:00:00	23.2656	-25.5624	0.141089	4776.47
KKR	12/04/2016 00:27	12	4	Fall	2016-04-12	1	00:27:00	00:00:00	23.251	-25.5536	0.0539131	6156.07
KKR	13/04/2016 04:23	13	4	Fall	2016-04-13	1	04:23:00	04:00:00	23.2887	-25.566	0.0976449	5396.25
KKR	14/04/2016 00:53	14	4	Fall	2016-04-14	1	00:53:00	01:00:00	23.2808	-25.5553	0.443668	5150.34
KKR	15/04/2016 01:28	15	4	Fall	2016-04-15	1	01:28:00	01:00:00	23.2586	-25.5504	0.151223	7157.26
KKR	16/04/2016 00:27	16	4	Fall	2016-04-16	1	00:27:00	00:00:00	23.2664	-25.5468	0.21403	4076.94
KKR	17/04/2016 00:27	17	4	Fall	2016-04-17	1	00:27:00	00:00:00	23.2692	-25.5574	0.510305	10277.5
KKR	18/04/2016 00:27	18	4	Fall	2016-04-18	1	00:27:00	00:00:00	23.2674	-25.5438	0.199596	4641.17
KKR	19/04/2016 00:28	19	4	Fall	2016-04-19	1	00:28:00	00:00:00	23.2585	-25.5627	0.256778	6821.91
KKR	20/04/2016 00:57	20	4	Fall	2016-04-20	1	00:57:00	01:00:00	23.2418	-25.554	0.0647793	7586.4
KKR	21/04/2016 00:57	21	4	Fall	2016-04-21	1	00:57:00	01:00:00	23.2748	-25.5522	0.268195	6605.73
KKR	22/04/2016 00:34	22	4	Fall	2016-04-22	1	00:34:00	01:00:00	23.2576	-25.5451	0.170944	4606.33
KKR	23/04/2016 00:33	23	4	Fall	2016-04-23	1	00:33:00	01:00:00	23.266	-25.5648	0.669257	9498.44
KKR	24/04/2016 00:36	24	4	Fall	2016-04-24	1	00:36:00	01:00:00	23.2233	-25.571	0.0174729	9401.77
KKR	25/04/2016 00:53	25	4	Fall	2016-04-25	1	00:53:00	01:00:00	23.2689	-25.5554	0.324161	6628.26
KKR	26/04/2016 00:53	26	4	Fall	2016-04-26	1	00:53:00	01:00:00	23.2553	-25.5631	0.280153	6997.68
KKR	27/04/2016 00:50	27	4	Fall	2016-04-27	1	00:50:00	01:00:00	23.2477	-25.5436	0.0646015	9311.23
KKR	28/04/2016 00:50	28	4	Fall	2016-04-28	1	00:50:00	01:00:00	23.2507	-25.5877	0.539934	10321.7
KKR	29/04/2016 00:56	29	4	Fall	2016-04-29	1	00:56:00	01:00:00	23.2586	-25.5573	0.102051	7302.62
KKR	30/04/2016 00:21	30	4	Fall	2016-04-30	1	00:21:00	00:00:00	23.2737	-25.5483	0.603076	15156.7
KKR	01/05/2016 08:34	1	5	Dry	2016-05-01	1	08:34:00	09:00:00	23.2488	-25.5645	0.719621	10426.1
KKR	02/05/2016 00:17	2	5	Dry	2016-05-02	1	00:17:00	00:00:00	23.2548	-25.5553	0.121214	5429.61
KKR	03/05/2016 00:35	3	5	Dry	2016-05-03	1	00:35:00	01:00:00	23.2595	-25.561	0.106913	5425.72
KKR	04/05/2016 00:15	4	5	Dry	2016-05-04	1	00:15:00	00:00:00	23.2609	-25.5484	0.404893	6651.3
KKR	05/05/2016 01:15	5	5	Dry	2016-05-05	1	01:15:00	01:00:00	23.2538	-25.5556	0.0932958	7836.67
KKR	06/05/2016 00:16	6	5	Dry	2016-05-06	1	00:16:00	00:00:00	23.2526	-25.5433	0.185707	4293.36
KKR	07/05/2016 01:15	7	5	Dry	2016-05-07	1	01:15:00	01:00:00	23.2667	-25.5463	0.180494	8137.02
KKR	08/05/2016 00:24	8	5	Dry	2016-05-08	1	00:24:00	00:00:00	23.2733	-25.5625	0.161106	5652.36
KKR	09/05/2016 00:45	9	5	Dry	2016-05-09	1	00:45:00	01:00:00	23.2535	-25.5408	0.130462	9570.53
KKR	10/05/2016 00:26	10	5	Dry	2016-05-10	1	00:26:00	00:00:00	23.2743	-25.5515	0.307864	6571.88
KKR	11/05/2016 01:01	11	5	Dry	2016-05-11	1	01:01:00	01:00:00	23.2552	-25.5567	0.0855914	9555.4
KKR	12/05/2016 00:15	12	5	Dry	2016-05-12	1	00:15:00	00:00:00	23.2431	-25.5439	0.0399267	6642.13
KKR	13/05/2016 00:38	13	5	Dry	2016-05-13	1	00:38:00	01:00:00	23.2681	-25.5504	0.21251	9091.67
KKR	14/05/2016 00:38	14	5	Dry	2016-05-14	1	00:38:00	01:00:00	23.2619	-25.5463	0.146709	9468.76
KKR	15/05/2016 00:40	15	5	Dry	2016-05-15	1	00:40:00	01:00:00	23.2724	-25.5534	0.891688	6796.1
KKR	16/05/2016 00:06	16	5	Dry	2016-05-16	1	00:06:00	00:00:00	23.2417	-25.5456	0.248673	11199.2
KKR	17/05/2016 01:10	17	5	Dry	2016-05-17	1	01:10:00	01:00:00	23.2697	-25.5411	0.0511225	8438.12
KKR	18/05/2016 00:25	18	5	Dry	2016-05-18	1	00:25:00	00:00:00	23.2664	-25.564	0.112982	6956.57
KKR	19/05/2016 00:23	19	5	Dry	2016-05-19	1	00:23:00	00:00:00	23.2654	-25.5373	0.450465	11738.3
KKR	20/05/2016 00:24	20	5	Dry	2016-05-20	1	00:24:00	00:00:00	23.3158	-25.5293	0.111239	7563.54
KKR	21/05/2016 00:24	21	5	Dry	2016-05-21	1	00:24:00	00:00:00	23.3043	-25.5216	0.121262	7779.21
KKR	22/05/2016 00:55	22	5	Dry	2016-05-22	1	00:55:00	01:00:00	23.3183	-25.5325	0.258602	8501.03
KKR	23/05/2016 00:56	23	5	Dry	2016-05-23	1	00:56:00	01:00:00	23.2659	-25.557	0.301671	6387.89
KKR	24/05/2016 00:56	24	5	Dry	2016-05-24	1	00:56:00	01:00:00	23.264	-25.5496	0.0223697	8598.38
KKR	25/05/2016 00:54	25	5	Dry	2016-05-25	1	00:54:00	01:00:00	23.2544	-25.5455	0.173796	6828.2
KKR	26/05/2016 00:20	26	5	Dry	2016-05-26	1	00:20:00	00:00:00	23.2742	-25.5452	0.397536	8650.08
KKR	27/05/2016 02:00	27	5	Dry	2016-05-27	1	02:00:00	02:00:00	23.2482	-25.5479	0.07405	6138.63
KKR	28/05/2016 00:05	28	5	Dry	2016-05-28	1	00:05:00	00:00:00	23.2717	-25.5421	0.172433	11768
KKR	29/05/2016 00:04	29	5	Dry	2016-05-29	1	00:04:00	00:00:00	23.3181	-25.5181	0.620637	6033.18
KKR	30/05/2016 00:33	30	5	Dry	2016-05-30	1	00:33:00	01:00:00	23.3057	-25.5222	0.116549	8701.08
KKR	31/05/2016 00:22	31	5	Dry	2016-05-31	1	00:22:00	00:00:00	23.2748	-25.5665	0.00576852	8325.51
KKR	01/06/2016 01:20	1	6	Dry	2016-06-01	1	01:20:00	01:00:00	23.2718	-25.5331	0.123584	9963.49
KKR	02/06/2016 00:47	2	6	Dry	2016-06-02	1	00:47:00	01:00:00	23.2731	-25.5313	0.0256336	9644.51
KKR	03/06/2016 00:48	3	6	Dry	2016-06-03	1	00:48:00	01:00:00	23.3098	-25.5235	0.10752	8027.5
KKR	04/06/2016 00:47	4	6	Dry	2016-06-04	1	00:47:00	01:00:00	23.2549	-25.5454	0.0327185	12209.1
KKR	05/06/2016 00:35	5	6	Dry	2016-06-05	1	00:35:00	01:00:00	23.2589	-25.5294	0.0947252	5964.46
KKR	06/06/2016 01:34	6	6	Dry	2016-06-06	1	01:34:00	02:00:00	23.2635	-25.5303	0.201766	10755.5
KKR	07/06/2016 00:53	7	6	Dry	2016-06-07	1	00:53:00	01:00:00	23.2715	-25.5342	0.119627	9621.11
KKR	08/06/2016 01:58	8	6	Dry	2016-06-08	1	01:58:00	02:00:00	23.2319	-25.5436	0.956025	13582.4
KKR	09/06/2016 00:03	9	6	Dry	2016-06-09	1	00:03:00	00:00:00	23.2882	-25.5365	0.179863	10253.5
KKR	10/06/2016 00:03	10	6	Dry	2016-06-10	1	00:03:00	00:00:00	23.3145	-25.5268	0.707594	18200.5
KKR	11/06/2016 00:03	11	6	Dry	2016-06-11	1	00:03:00	00:00:00	23.2506	-25.5418	0.875881	12821.3
KKR	12/06/2016 00:03	12	6	Dry	2016-06-12	1	00:03:00	00:00:00	23.2517	-25.5508	0.810274	15237.8
KKR	13/06/2016 00:37	13	6	Dry	2016-06-13	1	00:37:00	01:00:00	23.2358	-25.4591	0.244579	17284.2
KKR	14/06/2016 00:54	14	6	Dry	2016-06-14	1	00:54:00	01:00:00	23.2983	-25.4803	1.71134	19663.4
KKR	15/06/2016 00:52	15	6	Dry	2016-06-15	1	00:52:00	01:00:00	23.2437	-25.379	0.318913	21323.4
KKR	16/06/2016 00:51	16	6	Dry	2016-06-16	1	00:51:00	01:00:00	23.3171	-25.525	0.425032	11391.9
KKR	17/06/2016 00:23	17	6	Dry	2016-06-17	1	00:23:00	00:00:00	23.2556	-25.5022	0.141764	17074.6
KKR	18/06/2016 00:46	18	6	Dry	2016-06-18	1	00:46:00	01:00:00	23.2656	-25.5816	0.514019	14049.3
KKR	19/06/2016 00:52	19	6	Dry	2016-06-19	1	00:52:00	01:00:00	23.2345	-25.5644	0.236345	11624.3
KKR	20/06/2016 00:52	20	6	Dry	2016-06-20	1	00:52:00	01:00:00	23.2325	-25.5558	0.448876	14344.2
KKR	21/06/2016 00:52	21	6	Dry	2016-06-21	1	00:52:00	01:00:00	23.289	-25.4857	2.08412	20164.8
KKR	22/06/2016 00:52	22	6	Dry	2016-06-22	1	00:52:00	01:00:00	23.3157	-25.4896	0.899988	22960.1
KKR	23/06/2016 00:52	23	6	Dry	2016-06-23	1	00:52:00	01:00:00	23.2528	-25.4576	0.0893953	15578.1
KKR	24/06/2016 00:53	24	6	Dry	2016-06-24	1	00:53:00	01:00:00	23.2904	-25.4898	1.63046	13012.2
KKR	25/06/2016 00:52	25	6	Dry	2016-06-25	1	00:52:00	01:00:00	23.2721	-25.5326	0.531909	15131.5
KKR	26/06/2016 02:06	26	6	Dry	2016-06-26	1	02:06:00	02:00:00	23.2504	-25.5483	0.485104	17551.6
KKR	27/06/2016 00:04	27	6	Dry	2016-06-27	1	00:04:00	00:00:00	23.2269	-25.5379	1.24731	21235.1
KKR	28/06/2016 00:04	28	6	Dry	2016-06-28	1	00:04:00	00:00:00	23.2877	-25.4838	2.0968	8467.44
KKR	29/06/2016 00:04	29	6	Dry	2016-06-29	1	00:04:00	00:00:00	23.261	-25.5022	0.0887354	13260.2
KKR	30/06/2016 00:13	30	6	Dry	2016-06-30	1	00:13:00	00:00:00	23.2887	-25.5459	0.708824	14222.3
KKR	01/07/2016 00:12	1	7	Dry	2016-07-01	1	00:12:00	00:00:00	23.3201	-25.5112	1.22004	18110.4
KKR	02/07/2016 00:12	2	7	Dry	2016-07-02	1	00:12:00	00:00:00	23.3206	-25.5005	1.34413	13477.8
KKR	03/07/2016 00:12	3	7	Dry	2016-07-03	1	00:12:00	00:00:00	23.2858	-25.5435	0.0713384	17622.8
KKR	04/07/2016 00:57	4	7	Dry	2016-07-04	1	00:57:00	01:00:00	23.2899	-25.4888	1.92126	10969.1
KKR	05/07/2016 00:55	5	7	Dry	2016-07-05	1	00:55:00	01:00:00	23.2676	-25.4678	0.0716118	11162.4
KKR	06/07/2016 00:29	6	7	Dry	2016-07-06	1	00:29:00	00:00:00	23.305	-25.523	0.380866	8782.46
KKR	07/07/2016 00:37	7	7	Dry	2016-07-07	1	00:37:00	01:00:00	23.2558	-25.51	0.101026	15883.2
KKR	08/07/2016 00:49	8	7	Dry	2016-07-08	1	00:49:00	01:00:00	23.2797	-25.4856	2.14653	8818.02
KKR	09/07/2016 00:48	9	7	Dry	2016-07-09	1	00:48:00	01:00:00	23.2709	-25.5075	0.0420579	17988.5
KKR	10/07/2016 00:54	10	7	Dry	2016-07-10	1	00:54:00	01:00:00	23.2405	-25.5509	0.288472	11910
KKR	11/07/2016 00:16	11	7	Dry	2016-07-11	1	00:16:00	00:00:00	23.2417	-25.4626	0.216606	15598.6
KKR	12/07/2016 00:16	12	7	Dry	2016-07-12	1	00:16:00	00:00:00	23.3213	-25.4922	0.869874	10337.4
KKR	13/07/2016 00:16	13	7	Dry	2016-07-13	1	00:16:00	00:00:00	23.3134	-25.5021	1.47053	13261.8
KKR	14/07/2016 00:17	14	7	Dry	2016-07-14	1	00:17:00	00:00:00	23.3107	-25.5171	0.177048	9531.85
KKR	15/07/2016 00:06	15	7	Dry	2016-07-15	1	00:06:00	00:00:00	23.27	-25.4764	0.112578	13295.2
KKR	16/07/2016 00:16	16	7	Dry	2016-07-16	1	00:16:00	00:00:00	23.2849	-25.5492	0.254239	12420.7
KKR	17/07/2016 00:16	17	7	Dry	2016-07-17	1	00:16:00	00:00:00	23.2986	-25.5085	2.05268	14043.2
KKR	18/07/2016 00:16	18	7	Dry	2016-07-18	1	00:16:00	00:00:00	23.2536	-25.5038	0.0720075	10931
KKR	19/07/2016 00:15	19	7	Dry	2016-07-19	1	00:15:00	00:00:00	23.2866	-25.5506	0.0952012	9376.71
KKR	20/07/2016 00:16	20	7	Dry	2016-07-20	1	00:16:00	00:00:00	23.2616	-25.5442	1.32876	20655
KKR	21/07/2016 00:16	21	7	Dry	2016-07-21	1	00:16:00	00:00:00	23.3171	-25.5263	1.19025	16713.8
KKR	22/07/2016 00:10	22	7	Dry	2016-07-22	1	00:10:00	00:00:00	23.2826	-25.4191	1.56131	20380.1
KKR	23/07/2016 00:10	23	7	Dry	2016-07-23	1	00:10:00	00:00:00	23.2829	-25.5539	0.412531	8924.66
KKR	24/07/2016 00:21	24	7	Dry	2016-07-24	1	00:21:00	00:00:00	23.2378	-25.5532	0.398431	13279.8
KKR	25/07/2016 00:21	25	7	Dry	2016-07-25	1	00:21:00	00:00:00	23.2866	-25.4875	1.61447	9821.44
KKR	26/07/2016 01:24	26	7	Dry	2016-07-26	1	01:24:00	01:00:00	23.2586	-25.505	0.201235	24397.7
KKR	27/07/2016 00:33	27	7	Dry	2016-07-27	1	00:33:00	01:00:00	23.2609	-25.4664	0.769166	19248.1
KKR	28/07/2016 00:11	28	7	Dry	2016-07-28	1	00:11:00	00:00:00	23.2718	-25.5546	1.43708	13078.3
KKR	29/07/2016 00:11	29	7	Dry	2016-07-29	1	00:11:00	00:00:00	23.2191	-25.4836	0.0551487	16763
KKR	30/07/2016 00:11	30	7	Dry	2016-07-30	1	00:11:00	00:00:00	23.2729	-25.5265	1.05163	7804.79
KKR	31/07/2016 01:11	31	7	Dry	2016-07-31	1	01:11:00	01:00:00	23.2683	-25.4743	0.120504	14179.7
KKR	01/08/2016 00:10	1	8	Dry	2016-08-01	1	00:10:00	00:00:00	23.3303	-25.4717	2.0803	11859.6
KKR	02/08/2016 00:55	2	8	Dry	2016-08-02	1	00:55:00	01:00:00	23.3041	-25.4245	0.0165339	3860.67
KKR	03/08/2016 00:15	3	8	Dry	2016-08-03	1	00:15:00	00:00:00	23.2999	-25.4209	0.153484	9933.93
KKR	04/08/2016 00:16	4	8	Dry	2016-08-04	1	00:16:00	00:00:00	23.2686	-25.4724	0.180751	18340.9
KKR	05/08/2016 00:14	5	8	Dry	2016-08-05	1	00:14:00	00:00:00	23.2535	-25.5539	1.14308	11035.4
KKR	06/08/2016 00:15	6	8	Dry	2016-08-06	1	00:15:00	00:00:00	23.2285	-25.4945	0.135208	11878.9
KKR	07/08/2016 00:16	7	8	Dry	2016-08-07	1	00:16:00	00:00:00	23.2941	-25.5009	2.28674	9045.41
KKR	08/08/2016 00:17	8	8	Dry	2016-08-08	1	00:17:00	00:00:00	23.2702	-25.4766	0.200657	16253
KKR	09/08/2016 00:55	9	8	Dry	2016-08-09	1	00:55:00	01:00:00	23.2704	-25.4919	0.969012	5375.06
KKR	10/08/2016 00:56	10	8	Dry	2016-08-10	1	00:56:00	01:00:00	23.257	-25.4801	0.0586595	10586.3
KKR	11/08/2016 00:27	11	8	Dry	2016-08-11	1	00:27:00	00:00:00	23.3128	-25.5253	0.568161	11160.6
KKR	12/08/2016 00:29	12	8	Dry	2016-08-12	1	00:29:00	00:00:00	23.2395	-25.4735	0.00526898	12090.3
KKR	13/08/2016 00:09	13	8	Dry	2016-08-13	1	00:09:00	00:00:00	23.2826	-25.5094	2.71263	9301.83
KKR	14/08/2016 00:12	14	8	Dry	2016-08-14	1	00:12:00	00:00:00	23.2614	-25.4815	0.134418	9219.74
KKR	15/08/2016 01:00	15	8	Dry	2016-08-15	1	01:00:00	01:00:00	23.3115	-25.521	0.174942	9453.06
KKR	16/08/2016 01:10	16	8	Dry	2016-08-16	1	01:10:00	01:00:00	23.2667	-25.4752	0.126681	9931.57
KKR	17/08/2016 00:16	17	8	Dry	2016-08-17	1	00:16:00	00:00:00	23.3072	-25.5202	0.310231	8816.68
KKR	18/08/2016 01:00	18	8	Dry	2016-08-18	1	01:00:00	01:00:00	23.2621	-25.4757	0.050582	9679.8
KKR	19/08/2016 00:59	19	8	Dry	2016-08-19	1	00:59:00	01:00:00	23.3175	-25.5202	0.755263	10436.1
KKR	20/08/2016 00:14	20	8	Dry	2016-08-20	1	00:14:00	00:00:00	23.257	-25.4738	0.102259	10141.9
KKR	21/08/2016 00:11	21	8	Dry	2016-08-21	1	00:11:00	00:00:00	23.3124	-25.5194	0.369883	11957.2
KKR	22/08/2016 00:12	22	8	Dry	2016-08-22	1	00:12:00	00:00:00	23.254	-25.4849	0.0216895	11345.8
KKR	23/08/2016 00:46	23	8	Dry	2016-08-23	1	00:46:00	01:00:00	23.3132	-25.5047	0.74485	15282.6
KKR	24/08/2016 00:35	24	8	Dry	2016-08-24	1	00:35:00	01:00:00	23.2591	-25.4724	0.0509537	3887.4
KKR	25/08/2016 00:39	25	8	Dry	2016-08-25	1	00:39:00	01:00:00	23.2523	-25.4939	0.522284	15393.2
KKR	26/08/2016 00:45	26	8	Dry	2016-08-26	1	00:45:00	01:00:00	23.2627	-25.5272	0.437806	5171.34
KKR	27/08/2016 00:47	27	8	Dry	2016-08-27	1	00:47:00	01:00:00	23.2696	-25.5013	0.110713	9101.92
KKR	28/08/2016 00:44	28	8	Dry	2016-08-28	1	00:44:00	01:00:00	23.3057	-25.5221	0.571429	6474.07
KKR	29/08/2016 00:44	29	8	Dry	2016-08-29	1	00:44:00	01:00:00	23.2611	-25.5012	0.0490791	6082.66
KKR	30/08/2016 00:45	30	8	Dry	2016-08-30	1	00:45:00	01:00:00	23.2362	-25.4732	0.00814964	12777.4
KKR	31/08/2016 00:30	31	8	Dry	2016-08-31	1	00:30:00	01:00:00	23.2688	-25.5595	0.515332	12405.4
KKR	01/09/2016 00:50	1	9	Spring	2016-09-01	1	00:50:00	01:00:00	23.264	-25.5339	0.326764	8664.34
KKR	02/09/2016 01:16	2	9	Spring	2016-09-02	1	01:16:00	01:00:00	23.2684	-25.4728	0.0456356	9883.31
KKR	03/09/2016 00:16	3	9	Spring	2016-09-03	1	00:16:00	00:00:00	23.3151	-25.5201	0.534613	9996.05
KKR	04/09/2016 00:17	4	9	Spring	2016-09-04	1	00:17:00	00:00:00	23.2661	-25.4761	0.0380994	10387.2
KKR	05/09/2016 00:16	5	9	Spring	2016-09-05	1	00:16:00	00:00:00	23.311	-25.5158	0.62984	9626.51
KKR	06/09/2016 00:16	6	9	Spring	2016-09-06	1	00:16:00	00:00:00	23.2516	-25.5058	0.87303	13695.1
KKR	07/09/2016 00:39	7	9	Spring	2016-09-07	1	00:39:00	01:00:00	23.3102	-25.5346	0.481125	25447.8
KKR	08/09/2016 00:52	8	9	Spring	2016-09-08	1	00:52:00	01:00:00	23.2735	-25.4527	1.6566	16166.9
KKR	09/09/2016 00:15	9	9	Spring	2016-09-09	1	00:15:00	00:00:00	23.3041	-25.5108	1.22614	18654
KKR	10/09/2016 00:06	10	9	Spring	2016-09-10	1	00:06:00	00:00:00	23.295	-25.4506	2.1712	16955.3
KKR	11/09/2016 00:05	11	9	Spring	2016-09-11	1	00:05:00	00:00:00	23.3219	-25.4907	1.65903	14088.1
KKR	12/09/2016 01:05	12	9	Spring	2016-09-12	1	01:05:00	01:00:00	23.2683	-25.5081	0.0560653	9042.11
KKR	13/09/2016 00:05	13	9	Spring	2016-09-13	1	00:05:00	00:00:00	23.3069	-25.5201	0.288089	6804
KKR	14/09/2016 00:05	14	9	Spring	2016-09-14	1	00:05:00	00:00:00	23.2599	-25.5083	0.00746274	9006.16
KKR	15/09/2016 00:29	15	9	Spring	2016-09-15	1	00:29:00	00:00:00	23.3036	-25.525	0.187036	7509.08
KKR	16/09/2016 02:03	16	9	Spring	2016-09-16	1	02:03:00	02:00:00	23.2706	-25.4952	0.0207519	8903.06
KKR	17/09/2016 00:01	17	9	Spring	2016-09-17	1	00:01:00	00:00:00	23.3058	-25.5248	0.498456	7334.47
KKR	18/09/2016 00:02	18	9	Spring	2016-09-18	1	00:02:00	00:00:00	23.2697	-25.4853	0.524348	9632.57
KKR	19/09/2016 00:02	19	9	Spring	2016-09-19	1	00:02:00	00:00:00	23.3137	-25.5261	0.226015	7463.87
KKR	20/09/2016 00:40	20	9	Spring	2016-09-20	1	00:40:00	01:00:00	23.2572	-25.5033	0.0476436	7845.39
KKR	21/09/2016 00:34	21	9	Spring	2016-09-21	1	00:34:00	01:00:00	23.3158	-25.5299	0.171682	6863.42
KKR	22/09/2016 00:35	22	9	Spring	2016-09-22	1	00:35:00	01:00:00	23.2706	-25.5001	0.025518	9239.78
KKR	23/09/2016 00:35	23	9	Spring	2016-09-23	1	00:35:00	01:00:00	23.3177	-25.5266	0.233292	5368.21
KKR	24/09/2016 00:36	24	9	Spring	2016-09-24	1	00:36:00	01:00:00	23.3058	-25.5224	0.157783	9412.29
KKR	25/09/2016 01:34	25	9	Spring	2016-09-25	1	01:34:00	02:00:00	23.2691	-25.4829	0.00762818	9149.74
KKR	26/09/2016 00:44	26	9	Spring	2016-09-26	1	00:44:00	01:00:00	23.3144	-25.524	0.615693	11177.6
KKR	27/09/2016 00:44	27	9	Spring	2016-09-27	1	00:44:00	01:00:00	23.2685	-25.4804	0.0579532	10087
KKR	28/09/2016 00:44	28	9	Spring	2016-09-28	1	00:44:00	01:00:00	23.311	-25.5193	0.556749	6906.63
KKR	29/09/2016 00:44	29	9	Spring	2016-09-29	1	00:44:00	01:00:00	23.2611	-25.5073	0.0675024	8253.77
KKR	30/09/2016 00:45	30	9	Spring	2016-09-30	1	00:45:00	01:00:00	23.3101	-25.5212	0.334605	7722.79
KKR	01/10/2016 00:47	1	10	Spring	2016-10-01	1	00:47:00	01:00:00	23.3144	-25.5184	0.156844	6335.09
KKR	02/10/2016 00:51	2	10	Spring	2016-10-02	1	00:51:00	01:00:00	23.2889	-25.5067	0.525347	12358.8
KKR	03/10/2016 00:51	3	10	Spring	2016-10-03	1	00:51:00	01:00:00	23.2972	-25.4949	1.42683	8112.72
KKR	04/10/2016 00:54	4	10	Spring	2016-10-04	1	00:54:00	01:00:00	23.2675	-25.4687	0.0136918	10100.5
KKR	05/10/2016 00:06	5	10	Spring	2016-10-05	1	00:06:00	00:00:00	23.3142	-25.5279	0.295443	7956.77
KKR	06/10/2016 00:18	6	10	Spring	2016-10-06	1	00:18:00	00:00:00	23.2722	-25.5087	0.227286	15115.9
KKR	07/10/2016 00:18	7	10	Spring	2016-10-07	1	00:18:00	00:00:00	23.2697	-25.4844	0.135098	9670.04
KKR	08/10/2016 00:14	8	10	Spring	2016-10-08	1	00:14:00	00:00:00	23.3206	-25.5244	0.168274	10514.5
KKR	09/10/2016 03:15	9	10	Spring	2016-10-09	1	03:15:00	03:00:00	23.2656	-25.4801	0.00970176	3440.12
KKR	10/10/2016 01:14	10	10	Spring	2016-10-10	1	01:14:00	01:00:00	23.2706	-25.4939	0.0242481	10870.3
KKR	11/10/2016 00:13	11	10	Spring	2016-10-11	1	00:13:00	00:00:00	23.2943	-25.5025	0.965352	7758.26
KKR	12/10/2016 00:14	12	10	Spring	2016-10-12	1	00:14:00	00:00:00	23.2729	-25.4899	0.810722	12781.6
KKR	13/10/2016 00:49	13	10	Spring	2016-10-13	1	00:49:00	01:00:00	23.2979	-25.5106	0.962687	7092.87
KKR	14/10/2016 01:23	14	10	Spring	2016-10-14	1	01:23:00	01:00:00	23.2619	-25.4833	0.0617978	7003.04
KKR	15/10/2016 00:28	15	10	Spring	2016-10-15	1	00:28:00	00:00:00	23.3139	-25.528	1.68456	11578.8
KKR	16/10/2016 00:30	16	10	Spring	2016-10-16	1	00:30:00	01:00:00	23.2644	-25.4824	0.0183916	10461.2
KKR	17/10/2016 00:34	17	10	Spring	2016-10-17	1	00:34:00	01:00:00	23.3014	-25.5253	0.639305	14224
KKR	18/10/2016 00:33	18	10	Spring	2016-10-18	1	00:33:00	01:00:00	23.2699	-25.565	0.722247	5920.48
KKR	19/10/2016 00:28	19	10	Spring	2016-10-19	1	00:28:00	00:00:00	23.2684	-25.5715	0.423256	6197.89
KKR	20/10/2016 01:00	20	10	Spring	2016-10-20	1	01:00:00	01:00:00	23.2636	-25.5705	0.0156878	6586.53
KKR	21/10/2016 00:40	21	10	Spring	2016-10-21	1	00:40:00	01:00:00	23.2658	-25.5632	0.113338	3803.44
KKR	22/10/2016 00:39	22	10	Spring	2016-10-22	1	00:39:00	01:00:00	23.2535	-25.5649	0.113081	12119.9
KKR	23/10/2016 00:39	23	10	Spring	2016-10-23	1	00:39:00	01:00:00	23.3152	-25.5272	0.344849	8012.46
KKR	24/10/2016 00:14	24	10	Spring	2016-10-24	1	00:14:00	00:00:00	23.2692	-25.4856	1.35788	12532.2
KKR	25/10/2016 00:13	25	10	Spring	2016-10-25	1	00:13:00	00:00:00	23.2795	-25.528	1.39294	9969
KKR	26/10/2016 00:13	26	10	Spring	2016-10-26	1	00:13:00	00:00:00	23.2636	-25.5586	0.0233314	4647.96
KKR	27/10/2016 00:01	27	10	Spring	2016-10-27	1	00:01:00	00:00:00	23.2662	-25.5593	0.462101	7427.93
KKR	28/10/2016 00:31	28	10	Spring	2016-10-28	1	00:31:00	01:00:00	23.2644	-25.5547	0.190556	5375.77
KKR	29/10/2016 00:31	29	10	Spring	2016-10-29	1	00:31:00	01:00:00	23.2665	-25.5583	0.529636	8303.52
KKR	30/10/2016 00:40	30	10	Spring	2016-10-30	1	00:40:00	01:00:00	23.2743	-25.5635	0.549735	7668.83
KKR	31/10/2016 00:39	31	10	Spring	2016-10-31	1	00:39:00	01:00:00	23.2753	-25.5635	0.0847237	3138.06
KKR	01/11/2016 01:02	1	11	Wet	2016-11-01	1	01:02:00	01:00:00	23.2754	-25.5505	0.0472894	4976.68
KKR	02/11/2016 00:02	2	11	Wet	2016-11-02	1	00:02:00	00:00:00	23.2709	-25.5664	0.417725	4815.65
KKR	03/11/2016 00:02	3	11	Wet	2016-11-03	1	00:02:00	00:00:00	23.2792	-25.5452	0.586744	12736.1
KKR	04/11/2016 00:44	4	11	Wet	2016-11-04	1	00:44:00	01:00:00	23.276	-25.5678	0.172936	6246.24
KKR	05/11/2016 00:43	5	11	Wet	2016-11-05	1	00:43:00	01:00:00	23.2709	-25.5601	0.316899	2491.83
KKR	06/11/2016 00:28	6	11	Wet	2016-11-06	1	00:28:00	00:00:00	23.2691	-25.5507	0.151383	5553.39
KKR	07/11/2016 01:49	7	11	Wet	2016-11-07	1	01:49:00	02:00:00	23.2804	-25.554	0.0433418	5712.19
KKR	08/11/2016 00:50	8	11	Wet	2016-11-08	1	00:50:00	01:00:00	23.2682	-25.553	0.433087	4564.89
KKR	09/11/2016 00:10	9	11	Wet	2016-11-09	1	00:10:00	00:00:00	23.2837	-25.5609	0.0221332	5623.28
KKR	10/11/2016 00:33	10	11	Wet	2016-11-10	1	00:33:00	01:00:00	23.2797	-25.5569	0.0485639	8028.19
KKR	11/11/2016 00:33	11	11	Wet	2016-11-11	1	00:33:00	01:00:00	23.2672	-25.5515	0.156518	3764.13
KKR	12/11/2016 00:33	12	11	Wet	2016-11-12	1	00:33:00	01:00:00	23.2725	-25.5653	0.475503	5891.15
KKR	13/11/2016 00:49	13	11	Wet	2016-11-13	1	00:49:00	01:00:00	23.2837	-25.5622	0.0764791	4377.45
KKR	14/11/2016 00:47	14	11	Wet	2016-11-14	1	00:47:00	01:00:00	23.267	-25.5584	0.0827948	4162.78
KKR	15/11/2016 00:05	15	11	Wet	2016-11-15	1	00:05:00	00:00:00	23.2787	-25.5562	0.0631511	4313.36
KKR	16/11/2016 00:05	16	11	Wet	2016-11-16	1	00:05:00	00:00:00	23.2839	-25.5612	0.127414	6962.65
KKR	17/11/2016 00:40	17	11	Wet	2016-11-17	1	00:40:00	01:00:00	23.2648	-25.5616	0.141336	5244.96
KKR	18/11/2016 00:09	18	11	Wet	2016-11-18	1	00:09:00	00:00:00	23.2747	-25.5663	0.359697	4053.15
KKR	19/11/2016 00:28	19	11	Wet	2016-11-19	1	00:28:00	00:00:00	23.2762	-25.5749	0.612519	6884.18
KKR	20/11/2016 00:27	20	11	Wet	2016-11-20	1	00:27:00	00:00:00	23.2777	-25.58	0.0537948	5322.87
KKR	21/11/2016 00:27	21	11	Wet	2016-11-21	1	00:27:00	00:00:00	23.2796	-25.5785	0.21909	5712.51
KKR	22/11/2016 00:41	22	11	Wet	2016-11-22	1	00:41:00	01:00:00	23.2752	-25.5553	0.124074	5929.54
KKR	23/11/2016 03:40	23	11	Wet	2016-11-23	1	03:40:00	04:00:00	23.2683	-25.5667	0.0124818	3973.59
KKR	24/11/2016 00:40	24	11	Wet	2016-11-24	1	00:40:00	01:00:00	23.2635	-25.5652	0.133486	5522.61
KKR	25/11/2016 01:40	25	11	Wet	2016-11-25	1	01:40:00	02:00:00	23.2705	-25.5811	0.119747	6353.68
KKR	26/11/2016 00:40	26	11	Wet	2016-11-26	1	00:40:00	01:00:00	23.2739	-25.5812	0.0618021	4894.56
KKR	27/11/2016 00:40	27	11	Wet	2016-11-27	1	00:40:00	01:00:00	23.2818	-25.581	0.229602	5994.73
KKR	28/11/2016 00:40	28	11	Wet	2016-11-28	1	00:40:00	01:00:00	23.264	-25.5836	0.111875	5680.59
KKR	29/11/2016 00:40	29	11	Wet	2016-11-29	1	00:40:00	01:00:00	23.2655	-25.5822	0.0757617	4494.39
KKR	30/11/2016 00:47	30	11	Wet	2016-11-30	1	00:47:00	01:00:00	23.2718	-25.5806	0.14904	5763.64
KKR	01/12/2016 00:53	1	12	Wet	2016-12-01	1	00:53:00	01:00:00	23.2659	-25.5669	0.126917	5213.8
KKR	02/12/2016 00:57	2	12	Wet	2016-12-02	1	00:57:00	01:00:00	23.2852	-25.5787	0.0987847	5399.75
KKR	03/12/2016 00:57	3	12	Wet	2016-12-03	1	00:57:00	01:00:00	23.2625	-25.567	0.0960021	5619.89
KKR	04/12/2016 00:08	4	12	Wet	2016-12-04	1	00:08:00	00:00:00	23.2493	-25.5613	0.605341	8408.85
KKR	05/12/2016 00:07	5	12	Wet	2016-12-05	1	00:07:00	00:00:00	23.2717	-25.5618	0.151559	5929.99
KKR	01/09/2020 02:03	1	9	Spring	2020-09-01	2	02:03:00	02:00:00	23.2635	-25.5572	4.34e-05	13266.2
KKR	02/09/2020 00:01	2	9	Spring	2020-09-02	2	00:01:00	00:00:00	23.3153	-25.5458	0.165008	9635.5
KKR	03/09/2020 00:01	3	9	Spring	2020-09-03	2	00:01:00	00:00:00	23.3153	-25.5458	0.361315	5684.94
KKR	04/09/2020 00:15	4	9	Spring	2020-09-04	2	00:15:00	00:00:00	23.318	-25.5335	0.565058	12757.6
KKR	05/09/2020 00:15	5	9	Spring	2020-09-05	2	00:15:00	00:00:00	23.2416	-25.4755	0.00657166	3860.35
KKR	06/09/2020 00:15	6	9	Spring	2020-09-06	2	00:15:00	00:00:00	23.2212	-25.4931	0.15539	12643
KKR	07/09/2020 00:15	7	9	Spring	2020-09-07	2	00:15:00	00:00:00	23.3262	-25.5421	0.899129	5970.12
KKR	08/09/2020 00:15	8	9	Spring	2020-09-08	2	00:15:00	00:00:00	23.3264	-25.5649	0.0874898	8383.87
KKR	09/09/2020 00:15	9	9	Spring	2020-09-09	2	00:15:00	00:00:00	23.3204	-25.5448	0.256369	4460.88
KKR	10/09/2020 00:15	10	9	Spring	2020-09-10	2	00:15:00	00:00:00	23.3239	-25.5666	0.0215868	7505
KKR	11/09/2020 00:15	11	9	Spring	2020-09-11	2	00:15:00	00:00:00	23.3155	-25.5281	1.00755	14411.3
KKR	12/09/2020 00:15	12	9	Spring	2020-09-12	2	00:15:00	00:00:00	23.2284	-25.4677	0.0707252	4826.26
KKR	13/09/2020 00:15	13	9	Spring	2020-09-13	2	00:15:00	00:00:00	23.2547	-25.4717	0.0341648	12213.7
KKR	14/09/2020 00:15	14	9	Spring	2020-09-14	2	00:15:00	00:00:00	23.3153	-25.5321	0.630586	9346.97
KKR	15/09/2020 00:02	15	9	Spring	2020-09-15	2	00:02:00	00:00:00	23.2616	-25.5755	0.245997	4170.41
KKR	16/09/2020 00:01	16	9	Spring	2020-09-16	2	00:01:00	00:00:00	23.2852	-25.5729	0.712837	14024.4
KKR	17/09/2020 00:15	17	9	Spring	2020-09-17	2	00:15:00	00:00:00	23.2992	-25.5745	0.526345	7018.72
KKR	18/09/2020 00:15	18	9	Spring	2020-09-18	2	00:15:00	00:00:00	23.29	-25.5755	0.412741	8148.68
KKR	19/09/2020 00:01	19	9	Spring	2020-09-19	2	00:01:00	00:00:00	23.2953	-25.5572	0.467345	14056.5
KKR	20/09/2020 00:15	20	9	Spring	2020-09-20	2	00:15:00	00:00:00	23.2715	-25.5594	0.827811	10812.1
KKR	21/09/2020 00:15	21	9	Spring	2020-09-21	2	00:15:00	00:00:00	23.2624	-25.546	0.32204	8896.82
KKR	22/09/2020 00:15	22	9	Spring	2020-09-22	2	00:15:00	00:00:00	23.2525	-25.4847	1.19338	6313.31
KKR	23/09/2020 00:15	23	9	Spring	2020-09-23	2	00:15:00	00:00:00	23.2349	-25.4721	0.0036324	13460.9
KKR	24/09/2020 00:15	24	9	Spring	2020-09-24	2	00:15:00	00:00:00	23.3065	-25.5203	0.207409	10531.5
KKR	25/09/2020 00:15	25	9	Spring	2020-09-25	2	00:15:00	00:00:00	23.2381	-25.4717	0.142211	10713.3
KKR	26/09/2020 00:15	26	9	Spring	2020-09-26	2	00:15:00	00:00:00	23.2766	-25.568	2.77849	10102.7
KKR	27/09/2020 00:15	27	9	Spring	2020-09-27	2	00:15:00	00:00:00	23.2466	-25.596	0.0325222	5020.94
KKR	28/09/2020 00:15	28	9	Spring	2020-09-28	2	00:15:00	00:00:00	23.2745	-25.5839	0.265864	12627.8
KKR	29/09/2020 01:00	29	9	Spring	2020-09-29	2	01:00:00	01:00:00	23.2619	-25.4885	5.42637	22130.8
KKR	30/09/2020 00:15	30	9	Spring	2020-09-30	2	00:15:00	00:00:00	23.194	-25.4846	0.0211921	8716.55
KKR	01/10/2020 00:02	1	10	Spring	2020-10-01	2	00:02:00	00:00:00	23.2377	-25.5285	1.59715	15335.5
KKR	02/10/2020 01:00	2	10	Spring	2020-10-02	2	01:00:00	01:00:00	23.2264	-25.4783	3.79277	14732.1
KKR	03/10/2020 00:02	3	10	Spring	2020-10-03	2	00:02:00	00:00:00	23.1869	-25.4911	0.298463	8832.84
KKR	04/10/2020 00:01	4	10	Spring	2020-10-04	2	00:01:00	00:00:00	23.2248	-25.5213	0.773683	15598.2
KKR	05/10/2020 01:00	5	10	Spring	2020-10-05	2	01:00:00	01:00:00	23.2562	-25.5243	1.62383	13302.4
KKR	06/10/2020 00:16	6	10	Spring	2020-10-06	2	00:16:00	00:00:00	23.2059	-25.4681	0.0166873	5328.17
KKR	07/10/2020 00:15	7	10	Spring	2020-10-07	2	00:15:00	00:00:00	23.1918	-25.4695	0.060547	4151.06
KKR	08/10/2020 00:15	8	10	Spring	2020-10-08	2	00:15:00	00:00:00	23.2061	-25.4626	0.451911	19323.2
KKR	09/10/2020 00:15	9	10	Spring	2020-10-09	2	00:15:00	00:00:00	23.2939	-25.5278	1.64891	13286.9
KKR	10/10/2020 00:15	10	10	Spring	2020-10-10	2	00:15:00	00:00:00	23.2301	-25.4592	0.00605437	8535.81
KKR	11/10/2020 00:15	11	10	Spring	2020-10-11	2	00:15:00	00:00:00	23.1984	-25.5016	0.0778598	12820.4
KKR	12/10/2020 00:15	12	10	Spring	2020-10-12	2	00:15:00	00:00:00	23.272	-25.5704	0.973966	8543.6
KKR	13/10/2020 00:15	13	10	Spring	2020-10-13	2	00:15:00	00:00:00	23.2571	-25.589	0.366172	5755.82
KKR	14/10/2020 00:15	14	10	Spring	2020-10-14	2	00:15:00	00:00:00	23.2769	-25.5939	0.121965	9276.39
KKR	15/10/2020 00:15	15	10	Spring	2020-10-15	2	00:15:00	00:00:00	23.2748	-25.5938	0.290498	6009.48
KKR	16/10/2020 00:15	16	10	Spring	2020-10-16	2	00:15:00	00:00:00	23.263	-25.6004	0.475459	11352.5
KKR	17/10/2020 00:15	17	10	Spring	2020-10-17	2	00:15:00	00:00:00	23.299	-25.543	0.701649	15578.6
KKR	18/10/2020 00:15	18	10	Spring	2020-10-18	2	00:15:00	00:00:00	23.2314	-25.4668	0.177447	12529.3
KKR	19/10/2020 00:15	19	10	Spring	2020-10-19	2	00:15:00	00:00:00	23.3143	-25.5281	0.184854	9667.98
KKR	20/10/2020 00:15	20	10	Spring	2020-10-20	2	00:15:00	00:00:00	23.3161	-25.5279	0.0349471	12111.9
KKR	21/10/2020 00:15	21	10	Spring	2020-10-21	2	00:15:00	00:00:00	23.2674	-25.5652	0.776418	8037.65
KKR	22/10/2020 00:01	22	10	Spring	2020-10-22	2	00:01:00	00:00:00	23.2649	-25.5619	0.25916	12398
KKR	23/10/2020 00:15	23	10	Spring	2020-10-23	2	00:15:00	00:00:00	23.2839	-25.5108	1.0504	10828.4
KKR	24/10/2020 00:15	24	10	Spring	2020-10-24	2	00:15:00	00:00:00	23.2434	-25.4621	0.291889	12526.5
KKR	25/10/2020 00:01	25	10	Spring	2020-10-25	2	00:01:00	00:00:00	23.3175	-25.5301	0.133653	8615.41
KKR	26/10/2020 00:15	26	10	Spring	2020-10-26	2	00:15:00	00:00:00	23.2815	-25.5758	0.825623	7947.05
KKR	27/10/2020 00:15	27	10	Spring	2020-10-27	2	00:15:00	00:00:00	23.2626	-25.5699	0.147418	5962.69
KKR	28/10/2020 00:02	28	10	Spring	2020-10-28	2	00:02:00	00:00:00	23.2681	-25.5896	0.956642	9463.37
KKR	29/10/2020 00:15	29	10	Spring	2020-10-29	2	00:15:00	00:00:00	23.2657	-25.567	0.733803	4536.49
KKR	30/10/2020 00:15	30	10	Spring	2020-10-30	2	00:15:00	00:00:00	23.2661	-25.565	0.147932	10782.5
KKR	31/10/2020 00:15	31	10	Spring	2020-10-31	2	00:15:00	00:00:00	23.317	-25.5288	0.519128	10066
KKR	01/11/2020 00:15	1	11	Wet	2020-11-01	2	00:15:00	00:00:00	23.2509	-25.4962	0.134666	13082.6
KKR	02/11/2020 00:15	2	11	Wet	2020-11-02	2	00:15:00	00:00:00	23.2728	-25.5656	2.36996	7820.32
KKR	03/11/2020 00:15	3	11	Wet	2020-11-03	2	00:15:00	00:00:00	23.2688	-25.5768	0.202013	6935.78
KKR	04/11/2020 00:01	4	11	Wet	2020-11-04	2	00:01:00	00:00:00	23.2934	-25.5526	0.406121	8244.89
KKR	05/11/2020 00:15	5	11	Wet	2020-11-05	2	00:15:00	00:00:00	23.3112	-25.5195	0.365615	10690.2
KKR	06/11/2020 00:15	6	11	Wet	2020-11-06	2	00:15:00	00:00:00	23.2639	-25.5442	1.53441	11763.6
KKR	07/11/2020 00:15	7	11	Wet	2020-11-07	2	00:15:00	00:00:00	23.2764	-25.5679	0.999999	7018.23
KKR	08/11/2020 00:15	8	11	Wet	2020-11-08	2	00:15:00	00:00:00	23.268	-25.5629	0.181885	3028.71
KKR	09/11/2020 00:15	9	11	Wet	2020-11-09	2	00:15:00	00:00:00	23.2724	-25.5648	0.589919	5818.66
KKR	10/11/2020 00:15	10	11	Wet	2020-11-10	2	00:15:00	00:00:00	23.2717	-25.5641	0.192393	5026.79
KKR	11/11/2020 00:15	11	11	Wet	2020-11-11	2	00:15:00	00:00:00	23.2668	-25.5625	0.182945	5644.1
KKR	12/11/2020 00:15	12	11	Wet	2020-11-12	2	00:15:00	00:00:00	23.2694	-25.5679	0.0862764	3928.65
KKR	13/11/2020 00:15	13	11	Wet	2020-11-13	2	00:15:00	00:00:00	23.2696	-25.5683	0.0422029	4561.34
KKR	14/11/2020 00:15	14	11	Wet	2020-11-14	2	00:15:00	00:00:00	23.2666	-25.5663	0.0879581	4070.52
KKR	15/11/2020 00:15	15	11	Wet	2020-11-15	2	00:15:00	00:00:00	23.2764	-25.5685	0.265324	4230.57
KKR	16/11/2020 00:15	16	11	Wet	2020-11-16	2	00:15:00	00:00:00	23.2692	-25.5712	0.111366	4760.02
KKR	17/11/2020 00:15	17	11	Wet	2020-11-17	2	00:15:00	00:00:00	23.2779	-25.5661	0.126413	6653.51
KKR	18/11/2020 00:15	18	11	Wet	2020-11-18	2	00:15:00	00:00:00	23.2688	-25.5611	0.00569503	4403.85
KKR	19/11/2020 00:15	19	11	Wet	2020-11-19	2	00:15:00	00:00:00	23.2917	-25.5637	0.193487	6993.94
KKR	20/11/2020 00:15	20	11	Wet	2020-11-20	2	00:15:00	00:00:00	23.2671	-25.558	0.315493	4418.02
KKR	21/11/2020 00:01	21	11	Wet	2020-11-21	2	00:01:00	00:00:00	23.2682	-25.5658	0.145665	4853.71
KKR	22/11/2020 01:00	22	11	Wet	2020-11-22	2	01:00:00	01:00:00	23.2724	-25.5622	0.0460744	7460.06
KKR	23/11/2020 00:15	23	11	Wet	2020-11-23	2	00:15:00	00:00:00	23.2472	-25.565	0.534872	7896.35
KKR	24/11/2020 00:01	24	11	Wet	2020-11-24	2	00:01:00	00:00:00	23.2689	-25.5659	0.386832	6423.5
KKR	25/11/2020 00:16	25	11	Wet	2020-11-25	2	00:16:00	00:00:00	23.27	-25.5651	0.244253	4926.52
KKR	26/11/2020 00:01	26	11	Wet	2020-11-26	2	00:01:00	00:00:00	23.2672	-25.5625	0.170945	3466.43
KKR	27/11/2020 00:01	27	11	Wet	2020-11-27	2	00:01:00	00:00:00	23.2698	-25.5616	0.0856902	3719.66
KKR	28/11/2020 00:01	28	11	Wet	2020-11-28	2	00:01:00	00:00:00	23.2766	-25.5673	0.193335	5908.78
KKR	29/11/2020 01:00	29	11	Wet	2020-11-29	2	01:00:00	01:00:00	23.2661	-25.5649	0.141645	3531.18
KKR	30/11/2020 00:15	30	11	Wet	2020-11-30	2	00:15:00	00:00:00	23.2522	-25.5634	0.24936	8312.91
KKR	01/12/2020 00:15	1	12	Wet	2020-12-01	2	00:15:00	00:00:00	23.2898	-25.5818	0.970412	5364.18
KKR	02/12/2020 00:15	2	12	Wet	2020-12-02	2	00:15:00	00:00:00	23.2924	-25.5935	0.00911944	6318.74
KKR	03/12/2020 00:15	3	12	Wet	2020-12-03	2	00:15:00	00:00:00	23.2763	-25.5947	0.0470302	8440.29
KKR	04/12/2020 00:15	4	12	Wet	2020-12-04	2	00:15:00	00:00:00	23.2775	-25.5824	0.246819	6529.16
KKR	05/12/2020 00:15	5	12	Wet	2020-12-05	2	00:15:00	00:00:00	23.2889	-25.5862	0.16254	6657.34
KKR	06/12/2020 00:15	6	12	Wet	2020-12-06	2	00:15:00	00:00:00	23.2689	-25.5786	0.172492	6068.16
KKR	07/12/2020 00:15	7	12	Wet	2020-12-07	2	00:15:00	00:00:00	23.2898	-25.578	0.554746	5476.8
KKR	08/12/2020 00:15	8	12	Wet	2020-12-08	2	00:15:00	00:00:00	23.2823	-25.573	0.278574	5684.72
KKR	09/12/2020 00:15	9	12	Wet	2020-12-09	2	00:15:00	00:00:00	23.3043	-25.593	0.493569	8930.31
KKR	10/12/2020 00:15	10	12	Wet	2020-12-10	2	00:15:00	00:00:00	23.2859	-25.5629	0.155945	4835.48
KKR	11/12/2020 00:15	11	12	Wet	2020-12-11	2	00:15:00	00:00:00	23.2978	-25.542	0.292968	14496.2
KKR	12/12/2020 00:15	12	12	Wet	2020-12-12	2	00:15:00	00:00:00	23.2881	-25.5239	0.209699	12288.9
KKR	13/12/2020 00:15	13	12	Wet	2020-12-13	2	00:15:00	00:00:00	23.2589	-25.571	0.0546607	9056.23
KKR	14/12/2020 00:15	14	12	Wet	2020-12-14	2	00:15:00	00:00:00	23.2801	-25.559	1.12704	17353.2
KKR	15/12/2020 00:15	15	12	Wet	2020-12-15	2	00:15:00	00:00:00	23.2747	-25.5665	1.85079	16112.9
KKR	16/12/2020 00:15	16	12	Wet	2020-12-16	2	00:15:00	00:00:00	23.2837	-25.5495	0.181764	7010.53
KKR	17/12/2020 00:15	17	12	Wet	2020-12-17	2	00:15:00	00:00:00	23.2883	-25.5589	0.817647	14614.7
KKR	18/12/2020 00:15	18	12	Wet	2020-12-18	2	00:15:00	00:00:00	23.3039	-25.5281	0.654843	8291.31
KKR	19/12/2020 00:01	19	12	Wet	2020-12-19	2	00:01:00	00:00:00	23.3246	-25.5282	0.124947	9791.51
KKR	20/12/2020 00:15	20	12	Wet	2020-12-20	2	00:15:00	00:00:00	23.3367	-25.5712	0.735438	10107.6
KKR	21/12/2020 00:15	21	12	Wet	2020-12-21	2	00:15:00	00:00:00	23.3247	-25.5255	0.326168	9486.44
KKR	22/12/2020 00:15	22	12	Wet	2020-12-22	2	00:15:00	00:00:00	23.3405	-25.5336	0.871436	12657.9
KKR	23/12/2020 00:15	23	12	Wet	2020-12-23	2	00:15:00	00:00:00	23.3234	-25.5305	0.519238	13910.9
KKR	24/12/2020 00:01	24	12	Wet	2020-12-24	2	00:01:00	00:00:00	23.2533	-25.5682	2.3126	20212
KKR	25/12/2020 00:16	25	12	Wet	2020-12-25	2	00:16:00	00:00:00	23.2763	-25.5683	3.0055	10907.3
KKR	26/12/2020 00:15	26	12	Wet	2020-12-26	2	00:15:00	00:00:00	23.2891	-25.5554	0.0623884	7594.57
KKR	27/12/2020 00:01	27	12	Wet	2020-12-27	2	00:01:00	00:00:00	23.3207	-25.4901	2.73056	10976.4
KKR	28/12/2020 00:15	28	12	Wet	2020-12-28	2	00:15:00	00:00:00	23.306	-25.4917	0.499739	19100.7
KKR	29/12/2020 01:00	29	12	Wet	2020-12-29	2	01:00:00	01:00:00	23.3172	-25.529	1.61133	13208.8
KKR	30/12/2020 00:15	30	12	Wet	2020-12-30	2	00:15:00	00:00:00	23.3317	-25.5284	0.924337	15681.1
KKR	31/12/2020 00:15	31	12	Wet	2020-12-31	2	00:15:00	00:00:00	23.2968	-25.5183	1.08354	14499
KKR	01/01/2021 00:15	1	1	Wet	2021-01-01	2	00:15:00	00:00:00	23.3677	-25.5404	0.5406	11931.7
KKR	02/01/2021 00:01	2	1	Wet	2021-01-02	2	00:01:00	00:00:00	23.2891	-25.5271	1.952	12843.1
KKR	03/01/2021 00:01	3	1	Wet	2021-01-03	2	00:01:00	00:00:00	23.2438	-25.456	0.096308	13353
KKR	04/01/2021 00:15	4	1	Wet	2021-01-04	2	00:15:00	00:00:00	23.3177	-25.5263	0.226195	14223.5
KKR	05/01/2021 00:15	5	1	Wet	2021-01-05	2	00:15:00	00:00:00	23.248	-25.453	0.0348452	5786.11
KKR	06/01/2021 00:02	6	1	Wet	2021-01-06	2	00:02:00	00:00:00	23.2514	-25.4575	0.197683	12603.8
KKR	07/01/2021 00:15	7	1	Wet	2021-01-07	2	00:15:00	00:00:00	23.3093	-25.522	0.820906	12258.5
KKR	08/01/2021 00:01	8	1	Wet	2021-01-08	2	00:01:00	00:00:00	23.2513	-25.4557	0.227267	3320.89
KKR	09/01/2021 00:02	9	1	Wet	2021-01-09	2	00:02:00	00:00:00	23.2561	-25.454	0.00415063	6111.05
KKR	10/01/2021 00:15	10	1	Wet	2021-01-10	2	00:15:00	00:00:00	23.2435	-25.4586	0.177758	7734.15
KKR	11/01/2021 01:15	11	1	Wet	2021-01-11	2	01:15:00	01:00:00	23.2287	-25.4688	0.013331	5973.98
KKR	12/01/2021 03:15	12	1	Wet	2021-01-12	2	03:15:00	03:00:00	23.2398	-25.4559	0.140904	5856.7
KKR	13/01/2021 01:15	13	1	Wet	2021-01-13	2	01:15:00	01:00:00	23.2423	-25.4657	0.166764	6197.83
KKR	14/01/2021 00:15	14	1	Wet	2021-01-14	2	00:15:00	00:00:00	23.2385	-25.4577	0.0433819	6488.46
KKR	15/01/2021 00:15	15	1	Wet	2021-01-15	2	00:15:00	00:00:00	23.2344	-25.4673	0.62692	5075.01
KKR	16/01/2021 01:00	16	1	Wet	2021-01-16	2	01:00:00	01:00:00	23.226	-25.4629	0.0372145	7219.5
KKR	17/01/2021 01:00	17	1	Wet	2021-01-17	2	01:00:00	01:00:00	23.2298	-25.4685	0.206231	6239.99
KKR	18/01/2021 00:01	18	1	Wet	2021-01-18	2	00:01:00	00:00:00	23.2304	-25.468	0.248623	9534.02
KKR	19/01/2021 00:15	19	1	Wet	2021-01-19	2	00:15:00	00:00:00	23.2385	-25.4693	0.483195	5212
KKR	20/01/2021 00:15	20	1	Wet	2021-01-20	2	00:15:00	00:00:00	23.253	-25.4601	0.108183	12050.9
KKR	21/01/2021 00:15	21	1	Wet	2021-01-21	2	00:15:00	00:00:00	23.317	-25.5284	2.49324	8680.5
KKR	22/01/2021 00:15	22	1	Wet	2021-01-22	2	00:15:00	00:00:00	23.3256	-25.5298	0.203627	7340.92
KKR	23/01/2021 00:15	23	1	Wet	2021-01-23	2	00:15:00	00:00:00	23.3196	-25.527	0.178255	15247
KKR	24/01/2021 00:15	24	1	Wet	2021-01-24	2	00:15:00	00:00:00	23.3216	-25.5271	0.292284	9929.96
KKR	25/01/2021 00:01	25	1	Wet	2021-01-25	2	00:01:00	00:00:00	23.2843	-25.5781	0.740544	6788.63
KKR	26/01/2021 00:15	26	1	Wet	2021-01-26	2	00:15:00	00:00:00	23.3103	-25.5584	0.0587019	7942.18
KKR	27/01/2021 00:01	27	1	Wet	2021-01-27	2	00:01:00	00:00:00	23.2974	-25.5625	0.836623	9997.27
KKR	28/01/2021 00:15	28	1	Wet	2021-01-28	2	00:15:00	00:00:00	23.292	-25.5553	0.290966	7274.08
KKR	29/01/2021 00:15	29	1	Wet	2021-01-29	2	00:15:00	00:00:00	23.3477	-25.5645	0.634165	7799.27
KKR	30/01/2021 00:15	30	1	Wet	2021-01-30	2	00:15:00	00:00:00	23.3386	-25.5542	0.869915	6934.11
KKR	31/01/2021 00:15	31	1	Wet	2021-01-31	2	00:15:00	00:00:00	23.3372	-25.5658	0.0317563	6896.99
KKR	01/02/2021 00:15	1	2	Wet	2021-02-01	2	00:15:00	00:00:00	23.336	-25.5603	0.264526	5136.13
KKR	02/02/2021 00:01	2	2	Wet	2021-02-02	2	00:01:00	00:00:00	23.3384	-25.5805	0.105124	3687.96
KKR	03/02/2021 00:01	3	2	Wet	2021-02-03	2	00:01:00	00:00:00	23.3374	-25.5746	0.157113	4015.95
KKR	04/02/2021 00:01	4	2	Wet	2021-02-04	2	00:01:00	00:00:00	23.3216	-25.5743	0.33925	6739.31
KKR	05/02/2021 00:01	5	2	Wet	2021-02-05	2	00:01:00	00:00:00	23.3385	-25.5586	0.332808	6625.37
KKR	06/02/2021 00:16	6	2	Wet	2021-02-06	2	00:16:00	00:00:00	23.3183	-25.5777	0.198337	6077.98
KKR	07/02/2021 00:01	7	2	Wet	2021-02-07	2	00:01:00	00:00:00	23.3331	-25.5464	0.341578	5644.15
KKR	08/02/2021 00:15	8	2	Wet	2021-02-08	2	00:15:00	00:00:00	23.3286	-25.5623	0.119218	7051.19
KKR	09/02/2021 00:15	9	2	Wet	2021-02-09	2	00:15:00	00:00:00	23.3443	-25.5468	0.255175	8988.67
KKR	10/02/2021 00:15	10	2	Wet	2021-02-10	2	00:15:00	00:00:00	23.3303	-25.5594	0.268022	10475.4
KKR	11/02/2021 00:15	11	2	Wet	2021-02-11	2	00:15:00	00:00:00	23.3421	-25.563	0.199089	6641.93
KKR	12/02/2021 00:01	12	2	Wet	2021-02-12	2	00:01:00	00:00:00	23.3389	-25.5551	1.17248	9621.06
KKR	13/02/2021 00:15	13	2	Wet	2021-02-13	2	00:15:00	00:00:00	23.3387	-25.5589	0.47422	9347.12
KKR	14/02/2021 00:15	14	2	Wet	2021-02-14	2	00:15:00	00:00:00	23.3333	-25.5646	0.312116	9597.67
KKR	15/02/2021 00:15	15	2	Wet	2021-02-15	2	00:15:00	00:00:00	23.2715	-25.5718	0.58111	9449.13
KKR	16/02/2021 00:15	16	2	Wet	2021-02-16	2	00:15:00	00:00:00	23.2478	-25.598	1.09692	10122.6
KKR	17/02/2021 00:15	17	2	Wet	2021-02-17	2	00:15:00	00:00:00	23.2915	-25.5527	0.0981663	5523.04
KKR	18/02/2021 00:15	18	2	Wet	2021-02-18	2	00:15:00	00:00:00	23.2958	-25.5445	0.291383	8782.71
KKR	19/02/2021 00:15	19	2	Wet	2021-02-19	2	00:15:00	00:00:00	23.2826	-25.5476	0.17617	7231.97
KKR	20/02/2021 00:15	20	2	Wet	2021-02-20	2	00:15:00	00:00:00	23.2828	-25.5857	1.28119	8057.99
KKR	21/02/2021 00:15	21	2	Wet	2021-02-21	2	00:15:00	00:00:00	23.2849	-25.56	0.138388	9436.03
KKR	22/02/2021 00:15	22	2	Wet	2021-02-22	2	00:15:00	00:00:00	23.3193	-25.5287	0.151048	7975.5
KKR	23/02/2021 00:15	23	2	Wet	2021-02-23	2	00:15:00	00:00:00	23.3284	-25.5453	0.551333	11092.1
KKR	24/02/2021 00:01	24	2	Wet	2021-02-24	2	00:01:00	00:00:00	23.2887	-25.5937	0.280964	9958.46
KKR	25/02/2021 00:02	25	2	Wet	2021-02-25	2	00:02:00	00:00:00	23.3109	-25.5286	0.740167	9045.24
KKR	26/02/2021 00:01	26	2	Wet	2021-02-26	2	00:01:00	00:00:00	23.3216	-25.5273	0.417604	7201.65
KKR	27/02/2021 00:01	27	2	Wet	2021-02-27	2	00:01:00	00:00:00	23.3236	-25.5297	0.40013	8439.83
KKR	28/02/2021 00:01	28	2	Wet	2021-02-28	2	00:01:00	00:00:00	23.3134	-25.5446	0.0562826	9243.76
KKR	01/03/2021 00:15	1	3	Fall	2021-03-01	2	00:15:00	00:00:00	23.3284	-25.5306	0.406867	8615.53
KKR	02/03/2021 00:15	2	3	Fall	2021-03-02	2	00:15:00	00:00:00	23.3173	-25.5256	0.190482	10691.2
KKR	03/03/2021 00:02	3	3	Fall	2021-03-03	2	00:02:00	00:00:00	23.2684	-25.564	0.628655	9287.14
KKR	04/03/2021 00:15	4	3	Fall	2021-03-04	2	00:15:00	00:00:00	23.2857	-25.5612	0.47658	8066.66
KKR	05/03/2021 00:15	5	3	Fall	2021-03-05	2	00:15:00	00:00:00	23.2944	-25.5558	0.111423	3095.58
KKR	06/03/2021 00:15	6	3	Fall	2021-03-06	2	00:15:00	00:00:00	23.3097	-25.5529	0.180054	13222.9
KKR	07/03/2021 00:01	7	3	Fall	2021-03-07	2	00:01:00	00:00:00	23.2959	-25.5126	1.96679	26937.5
KKR	08/03/2021 00:15	8	3	Fall	2021-03-08	2	00:15:00	00:00:00	23.2849	-25.5694	0.180197	5657.1
KKR	09/03/2021 00:15	9	3	Fall	2021-03-09	2	00:15:00	00:00:00	23.2868	-25.5626	0.074805	8761.08
KKR	10/03/2021 00:01	10	3	Fall	2021-03-10	2	00:01:00	00:00:00	23.2892	-25.5581	0.341955	9031.69
KKR	11/03/2021 00:15	11	3	Fall	2021-03-11	2	00:15:00	00:00:00	23.2984	-25.5495	0.784744	11500.6
KKR	12/03/2021 00:15	12	3	Fall	2021-03-12	2	00:15:00	00:00:00	23.3588	-25.5632	0.705435	12090.9
KKR	13/03/2021 01:00	13	3	Fall	2021-03-13	2	01:00:00	01:00:00	23.3185	-25.5288	0.471249	29030.8
KKR	14/03/2021 01:00	14	3	Fall	2021-03-14	2	01:00:00	01:00:00	23.3156	-25.5584	2.05019	21164.5
KKR	15/03/2021 00:01	15	3	Fall	2021-03-15	2	00:01:00	00:00:00	23.2561	-25.5598	0.623786	8142.6
KKR	16/03/2021 00:01	16	3	Fall	2021-03-16	2	00:01:00	00:00:00	23.2926	-25.5862	0.0765705	6573
KKR	17/03/2021 00:15	17	3	Fall	2021-03-17	2	00:15:00	00:00:00	23.2793	-25.5767	0.174897	9828.71
KKR	18/03/2021 00:15	18	3	Fall	2021-03-18	2	00:15:00	00:00:00	23.3235	-25.5281	0.0637093	8744.03
KKR	19/03/2021 00:15	19	3	Fall	2021-03-19	2	00:15:00	00:00:00	23.3501	-25.5492	0.25845	10893.3
KKR	20/03/2021 00:15	20	3	Fall	2021-03-20	2	00:15:00	00:00:00	23.3205	-25.5315	0.27547	11655.8
KKR	21/03/2021 00:01	21	3	Fall	2021-03-21	2	00:01:00	00:00:00	23.2925	-25.5537	0.139955	6967.21
KKR	22/03/2021 00:15	22	3	Fall	2021-03-22	2	00:15:00	00:00:00	23.3431	-25.5538	0.552601	12476.7
KKR	23/03/2021 00:01	23	3	Fall	2021-03-23	2	00:01:00	00:00:00	23.3285	-25.5449	1.02929	9866.19
KKR	24/03/2021 00:15	24	3	Fall	2021-03-24	2	00:15:00	00:00:00	23.341	-25.5594	1.30148	6910.31
KKR	25/03/2021 00:15	25	3	Fall	2021-03-25	2	00:15:00	00:00:00	23.3355	-25.5647	0.0224272	8425.12
KKR	26/03/2021 00:15	26	3	Fall	2021-03-26	2	00:15:00	00:00:00	23.3054	-25.5893	0.431464	9841.82
KKR	27/03/2021 00:15	27	3	Fall	2021-03-27	2	00:15:00	00:00:00	23.2779	-25.5533	0.119855	7630.13
KKR	28/03/2021 00:15	28	3	Fall	2021-03-28	2	00:15:00	00:00:00	23.2838	-25.5789	0.274855	6059.11
KKR	29/03/2021 00:15	29	3	Fall	2021-03-29	2	00:15:00	00:00:00	23.2942	-25.5524	0.217283	8793.84
KKR	30/03/2021 00:03	30	3	Fall	2021-03-30	2	00:03:00	00:00:00	23.3223	-25.5291	0.486854	10802.8
KKR	31/03/2021 00:15	31	3	Fall	2021-03-31	2	00:15:00	00:00:00	23.2859	-25.5791	0.226146	7916.37
KKR	01/04/2021 00:15	1	4	Fall	2021-04-01	2	00:15:00	00:00:00	23.3067	-25.5693	0.093412	8017.3
KKR	02/04/2021 00:15	2	4	Fall	2021-04-02	2	00:15:00	00:00:00	23.2888	-25.5648	0.271336	7736.8
KKR	03/04/2021 00:15	3	4	Fall	2021-04-03	2	00:15:00	00:00:00	23.2909	-25.5552	0.301834	6105.65
KKR	04/04/2021 00:15	4	4	Fall	2021-04-04	2	00:15:00	00:00:00	23.3019	-25.5813	0.0626584	7276.6
KKR	05/04/2021 00:15	5	4	Fall	2021-04-05	2	00:15:00	00:00:00	23.294	-25.5551	0.363677	7133.8
KKR	06/04/2021 00:15	6	4	Fall	2021-04-06	2	00:15:00	00:00:00	23.2809	-25.5427	0.0465707	6891.32
KKR	07/04/2021 00:15	7	4	Fall	2021-04-07	2	00:15:00	00:00:00	23.2815	-25.5426	0.237464	8866.81
KKR	08/04/2021 00:01	8	4	Fall	2021-04-08	2	00:01:00	00:00:00	23.32	-25.5389	0.187004	8904.42
KKR	09/04/2021 00:15	9	4	Fall	2021-04-09	2	00:15:00	00:00:00	23.3363	-25.5612	0.322815	6903.32
KKR	10/04/2021 00:15	10	4	Fall	2021-04-10	2	00:15:00	00:00:00	23.3171	-25.5288	1.54178	15826.7
KKR	11/04/2021 00:15	11	4	Fall	2021-04-11	2	00:15:00	00:00:00	23.3392	-25.5254	0.605445	10309.1
KKR	12/04/2021 00:15	12	4	Fall	2021-04-12	2	00:15:00	00:00:00	23.3292	-25.5335	0.641999	12637.8
KKR	13/04/2021 00:15	13	4	Fall	2021-04-13	2	00:15:00	00:00:00	23.2701	-25.5742	0.789437	11664.5
KKR	14/04/2021 00:15	14	4	Fall	2021-04-14	2	00:15:00	00:00:00	23.2896	-25.5581	0.43135	6711.95
KKR	15/04/2021 00:15	15	4	Fall	2021-04-15	2	00:15:00	00:00:00	23.3342	-25.5603	1.22053	12881.9
KKR	16/04/2021 00:15	16	4	Fall	2021-04-16	2	00:15:00	00:00:00	23.2923	-25.5554	0.329405	7976.37
KKR	17/04/2021 00:15	17	4	Fall	2021-04-17	2	00:15:00	00:00:00	23.3179	-25.5222	0.124804	14827.4
KKR	18/04/2021 00:15	18	4	Fall	2021-04-18	2	00:15:00	00:00:00	23.2949	-25.5359	0.143999	7409.63
KKR	19/04/2021 00:15	19	4	Fall	2021-04-19	2	00:15:00	00:00:00	23.2822	-25.5701	0.0978287	8836.06
KKR	20/04/2021 00:15	20	4	Fall	2021-04-20	2	00:15:00	00:00:00	23.3112	-25.5574	0.0113831	7906.22
KKR	21/04/2021 00:15	21	4	Fall	2021-04-21	2	00:15:00	00:00:00	23.3294	-25.5183	0.0406819	10286.5
KKR	22/04/2021 00:15	22	4	Fall	2021-04-22	2	00:15:00	00:00:00	23.3139	-25.5232	0.35423	9143.66
KKR	23/04/2021 00:15	23	4	Fall	2021-04-23	2	00:15:00	00:00:00	23.3114	-25.5352	0.749768	5481.71
KKR	24/04/2021 00:15	24	4	Fall	2021-04-24	2	00:15:00	00:00:00	23.3054	-25.5589	0.19689	10048.7
KKR	25/04/2021 00:01	25	4	Fall	2021-04-25	2	00:01:00	00:00:00	23.2885	-25.5373	0.19584	7003.76
KKR	26/04/2021 00:15	26	4	Fall	2021-04-26	2	00:15:00	00:00:00	23.2773	-25.5532	0.0647899	8394.14
KKR	27/04/2021 00:01	27	4	Fall	2021-04-27	2	00:01:00	00:00:00	23.3122	-25.5222	0.147681	8331.2
KKR	28/04/2021 00:01	28	4	Fall	2021-04-28	2	00:01:00	00:00:00	23.2874	-25.5577	0.0595073	6869.24
KKR	29/04/2021 00:15	29	4	Fall	2021-04-29	2	00:15:00	00:00:00	23.2769	-25.5444	0.115445	5070.43
KKR	30/04/2021 00:01	30	4	Fall	2021-04-30	2	00:01:00	00:00:00	23.2745	-25.5409	0.0898722	5208.46
KKR	01/05/2021 00:15	1	5	Dry	2021-05-01	2	00:15:00	00:00:00	23.2882	-25.5309	0.0171732	9278.21
KKR	02/05/2021 00:15	2	5	Dry	2021-05-02	2	00:15:00	00:00:00	23.2893	-25.5585	0.0632406	9615.25
KKR	03/05/2021 00:15	3	5	Dry	2021-05-03	2	00:15:00	00:00:00	23.3371	-25.5616	0.0706094	6651.07
KKR	04/05/2021 00:15	4	5	Dry	2021-05-04	2	00:15:00	00:00:00	23.3215	-25.5609	0.0607081	7328.05
KKR	05/05/2021 00:15	5	5	Dry	2021-05-05	2	00:15:00	00:00:00	23.3305	-25.5293	0.0917043	11139.7
KKR	06/05/2021 00:15	6	5	Dry	2021-05-06	2	00:15:00	00:00:00	23.2764	-25.5678	0.0198715	8653.18
KKR	07/05/2021 00:01	7	5	Dry	2021-05-07	2	00:01:00	00:00:00	23.2816	-25.5702	0.347464	6385.73
KKR	08/05/2021 00:15	8	5	Dry	2021-05-08	2	00:15:00	00:00:00	23.282	-25.5631	0.133126	4145.83
KKR	09/05/2021 00:15	9	5	Dry	2021-05-09	2	00:15:00	00:00:00	23.2852	-25.5617	0.151504	4119.92
KKR	10/05/2021 00:15	10	5	Dry	2021-05-10	2	00:15:00	00:00:00	23.2809	-25.5629	0.561706	4291.35
KKR	11/05/2021 00:15	11	5	Dry	2021-05-11	2	00:15:00	00:00:00	23.3099	-25.5672	0.0770817	6234.83
KKR	12/05/2021 00:01	12	5	Dry	2021-05-12	2	00:01:00	00:00:00	23.2901	-25.553	0.00242037	6168.39
KKR	13/05/2021 00:01	13	5	Dry	2021-05-13	2	00:01:00	00:00:00	23.2792	-25.5497	0.186627	9111.91
KKR	14/05/2021 00:15	14	5	Dry	2021-05-14	2	00:15:00	00:00:00	23.3207	-25.5259	0.207393	9655.67
KKR	15/05/2021 00:01	15	5	Dry	2021-05-15	2	00:01:00	00:00:00	23.3348	-25.5421	0.0775319	9547.53
KKR	16/05/2021 00:02	16	5	Dry	2021-05-16	2	00:02:00	00:00:00	23.2888	-25.5607	0.195736	8865.82
KKR	17/05/2021 00:15	17	5	Dry	2021-05-17	2	00:15:00	00:00:00	23.2916	-25.5562	0.0260816	5450.93
KKR	18/05/2021 00:01	18	5	Dry	2021-05-18	2	00:01:00	00:00:00	23.2846	-25.5619	0.28916	8666.91
KKR	19/05/2021 00:15	19	5	Dry	2021-05-19	2	00:15:00	00:00:00	23.3139	-25.5348	0.925028	6801.51
KKR	20/05/2021 00:15	20	5	Dry	2021-05-20	2	00:15:00	00:00:00	23.2763	-25.5679	1.75243	8309.73
KKR	21/05/2021 00:15	21	5	Dry	2021-05-21	2	00:15:00	00:00:00	23.2829	-25.5623	0.131215	6955.5
KKR	22/05/2021 00:15	22	5	Dry	2021-05-22	2	00:15:00	00:00:00	23.2943	-25.5853	0.461693	10617.6
KKR	23/05/2021 00:15	23	5	Dry	2021-05-23	2	00:15:00	00:00:00	23.3092	-25.59	0.397446	7885.69
KKR	24/05/2021 00:15	24	5	Dry	2021-05-24	2	00:15:00	00:00:00	23.2907	-25.5627	0.0686425	7050.63
KKR	25/05/2021 00:15	25	5	Dry	2021-05-25	2	00:15:00	00:00:00	23.321	-25.5293	0.258854	8771.48
KKR	26/05/2021 00:15	26	5	Dry	2021-05-26	2	00:15:00	00:00:00	23.3315	-25.5259	0.753756	10739.4
KKR	27/05/2021 00:15	27	5	Dry	2021-05-27	2	00:15:00	00:00:00	23.2766	-25.572	0.440219	7027.5
KKR	28/05/2021 00:15	28	5	Dry	2021-05-28	2	00:15:00	00:00:00	23.2858	-25.5714	0.0317164	6055.46
KKR	29/05/2021 00:15	29	5	Dry	2021-05-29	2	00:15:00	00:00:00	23.2878	-25.5797	0.325107	5311.02
KKR	30/05/2021 00:15	30	5	Dry	2021-05-30	2	00:15:00	00:00:00	23.3069	-25.5819	0.00605037	8641.31
KKR	31/05/2021 00:01	31	5	Dry	2021-05-31	2	00:01:00	00:00:00	23.266	-25.5903	0.303074	4699.4
KKR	01/06/2021 00:15	1	6	Dry	2021-06-01	2	00:15:00	00:00:00	23.2471	-25.582	0.0911521	8623.05
KKR	02/06/2021 00:15	2	6	Dry	2021-06-02	2	00:15:00	00:00:00	23.2732	-25.594	0.483444	8807.57
KKR	03/06/2021 00:15	3	6	Dry	2021-06-03	2	00:15:00	00:00:00	23.276	-25.5692	0.266667	6842.9
KKR	04/06/2021 00:15	4	6	Dry	2021-06-04	2	00:15:00	00:00:00	23.269	-25.5764	0.102566	5406.78
KKR	05/06/2021 00:15	5	6	Dry	2021-06-05	2	00:15:00	00:00:00	23.2687	-25.5875	0.507783	6688.07
KKR	06/06/2021 00:01	6	6	Dry	2021-06-06	2	00:01:00	00:00:00	23.2822	-25.5755	0.0345163	5579.75
KKR	07/06/2021 00:15	7	6	Dry	2021-06-07	2	00:15:00	00:00:00	23.3072	-25.5675	0.026448	8974.63
KKR	08/06/2021 00:15	8	6	Dry	2021-06-08	2	00:15:00	00:00:00	23.3095	-25.5436	0.103523	7428.6
KKR	09/06/2021 00:15	9	6	Dry	2021-06-09	2	00:15:00	00:00:00	23.2648	-25.5754	0.231901	7386.25
KKR	10/06/2021 00:15	10	6	Dry	2021-06-10	2	00:15:00	00:00:00	23.2684	-25.5997	0.214823	8451.18
KKR	11/06/2021 00:01	11	6	Dry	2021-06-11	2	00:01:00	00:00:00	23.2739	-25.5816	0.0111116	8001.76
KKR	12/06/2021 00:15	12	6	Dry	2021-06-12	2	00:15:00	00:00:00	23.2584	-25.5683	0.345087	6586
KKR	13/06/2021 00:15	13	6	Dry	2021-06-13	2	00:15:00	00:00:00	23.2804	-25.591	0.0470916	6800.43
KKR	14/06/2021 00:15	14	6	Dry	2021-06-14	2	00:15:00	00:00:00	23.2769	-25.5842	1.32181	7255.93
KKR	15/06/2021 00:15	15	6	Dry	2021-06-15	2	00:15:00	00:00:00	23.2762	-25.5686	0.750205	7751.37
KKR	16/06/2021 00:01	16	6	Dry	2021-06-16	2	00:01:00	00:00:00	23.2786	-25.5902	0.106484	8191.83
KKR	17/06/2021 00:15	17	6	Dry	2021-06-17	2	00:15:00	00:00:00	23.2832	-25.579	0.0197376	6465.01
KKR	18/06/2021 00:15	18	6	Dry	2021-06-18	2	00:15:00	00:00:00	23.2647	-25.5667	0.174059	7760.26
KKR	19/06/2021 00:01	19	6	Dry	2021-06-19	2	00:01:00	00:00:00	23.2685	-25.5915	0.28612	7676.82
KKR	20/06/2021 00:15	20	6	Dry	2021-06-20	2	00:15:00	00:00:00	23.2663	-25.565	0.159263	5228.44
KKR	21/06/2021 00:01	21	6	Dry	2021-06-21	2	00:01:00	00:00:00	23.2871	-25.5797	0.584932	10765.2
KKR	22/06/2021 00:15	22	6	Dry	2021-06-22	2	00:15:00	00:00:00	23.2694	-25.5988	0.53726	19306.9
KKR	23/06/2021 00:15	23	6	Dry	2021-06-23	2	00:15:00	00:00:00	23.2994	-25.5729	2.73678	12292.3
KKR	24/06/2021 00:15	24	6	Dry	2021-06-24	2	00:15:00	00:00:00	23.2916	-25.5665	0.0546856	4903.38
KKR	25/06/2021 00:15	25	6	Dry	2021-06-25	2	00:15:00	00:00:00	23.2957	-25.5559	0.305691	2829.64
KKR	26/06/2021 00:15	26	6	Dry	2021-06-26	2	00:15:00	00:00:00	23.3051	-25.546	0.197352	10528.5
KKR	27/06/2021 00:15	27	6	Dry	2021-06-27	2	00:15:00	00:00:00	23.267	-25.5761	0.435773	5857.62
KKR	28/06/2021 00:15	28	6	Dry	2021-06-28	2	00:15:00	00:00:00	23.2683	-25.5775	0.239521	6159.67
KKR	29/06/2021 00:15	29	6	Dry	2021-06-29	2	00:15:00	00:00:00	23.2712	-25.5879	0.865399	6564.49
KKR	30/06/2021 00:15	30	6	Dry	2021-06-30	2	00:15:00	00:00:00	23.2728	-25.571	0.416722	6265.5
KKR	01/07/2021 00:01	1	7	Dry	2021-07-01	2	00:01:00	00:00:00	23.2741	-25.5666	0.295468	5314.24
KKR	02/07/2021 00:15	2	7	Dry	2021-07-02	2	00:15:00	00:00:00	23.2521	-25.5878	0.0701592	6850.59
KKR	03/07/2021 00:15	3	7	Dry	2021-07-03	2	00:15:00	00:00:00	23.291	-25.5556	0.093857	7710.44
KKR	04/07/2021 00:15	4	7	Dry	2021-07-04	2	00:15:00	00:00:00	23.3201	-25.5428	0.339805	9435.5
KKR	05/07/2021 00:15	5	7	Dry	2021-07-05	2	00:15:00	00:00:00	23.269	-25.5782	0.0534495	8560.08
KKR	06/07/2021 00:15	6	7	Dry	2021-07-06	2	00:15:00	00:00:00	23.269	-25.5991	0.0684247	9094.82
KKR	07/07/2021 00:15	7	7	Dry	2021-07-07	2	00:15:00	00:00:00	23.2724	-25.59	0.0342837	8078.4
KKR	08/07/2021 00:15	8	7	Dry	2021-07-08	2	00:15:00	00:00:00	23.2727	-25.5889	0.321726	8608.97
KKR	09/07/2021 00:15	9	7	Dry	2021-07-09	2	00:15:00	00:00:00	23.2766	-25.5847	0.113602	7587.92
KKR	10/07/2021 00:15	10	7	Dry	2021-07-10	2	00:15:00	00:00:00	23.2437	-25.6136	0.013036	10368
KKR	11/07/2021 00:15	11	7	Dry	2021-07-11	2	00:15:00	00:00:00	23.3037	-25.5628	0.233754	8164.42
KKR	12/07/2021 00:15	12	7	Dry	2021-07-12	2	00:15:00	00:00:00	23.3108	-25.5461	0.325063	7800.66
KKR	13/07/2021 00:15	13	7	Dry	2021-07-13	2	00:15:00	00:00:00	23.2626	-25.5761	0.12379	7557.32
KKR	14/07/2021 00:15	14	7	Dry	2021-07-14	2	00:15:00	00:00:00	23.212	-25.5833	0.472699	17700.3
KKR	15/07/2021 00:15	15	7	Dry	2021-07-15	2	00:15:00	00:00:00	23.2744	-25.5803	1.12127	9479.2
KKR	16/07/2021 00:15	16	7	Dry	2021-07-16	2	00:15:00	00:00:00	23.265	-25.5963	0.0749002	8419.91
KKR	17/07/2021 00:15	17	7	Dry	2021-07-17	2	00:15:00	00:00:00	23.2699	-25.5984	0.264597	8515.87
KKR	18/07/2021 00:15	18	7	Dry	2021-07-18	2	00:15:00	00:00:00	23.2702	-25.5774	0.108008	7955.76
KKR	19/07/2021 00:01	19	7	Dry	2021-07-19	2	00:01:00	00:00:00	23.2675	-25.6001	0.844803	8173.71
KKR	20/07/2021 00:15	20	7	Dry	2021-07-20	2	00:15:00	00:00:00	23.2668	-25.5873	0.22438	8838.09
KKR	21/07/2021 00:16	21	7	Dry	2021-07-21	2	00:16:00	00:00:00	23.2554	-25.6117	1.77318	8922.35
KKR	22/07/2021 00:15	22	7	Dry	2021-07-22	2	00:15:00	00:00:00	23.2466	-25.5971	0.0403417	8167.85
KKR	23/07/2021 00:15	23	7	Dry	2021-07-23	2	00:15:00	00:00:00	23.2623	-25.5891	0.469214	5564.56
KKR	24/07/2021 00:15	24	7	Dry	2021-07-24	2	00:15:00	00:00:00	23.26	-25.6017	0.305595	10832.5
KKR	25/07/2021 00:15	25	7	Dry	2021-07-25	2	00:15:00	00:00:00	23.2995	-25.5546	0.345609	8211.32
KKR	26/07/2021 00:15	26	7	Dry	2021-07-26	2	00:15:00	00:00:00	23.317	-25.5449	0.174795	8059.27
KKR	27/07/2021 00:15	27	7	Dry	2021-07-27	2	00:15:00	00:00:00	23.3169	-25.5329	0.367605	5736.84
KKR	28/07/2021 00:15	28	7	Dry	2021-07-28	2	00:15:00	00:00:00	23.3247	-25.5356	0.949496	6541.93
KKR	29/07/2021 00:15	29	7	Dry	2021-07-29	2	00:15:00	00:00:00	23.3101	-25.5567	0.0371883	7716.06
KKR	30/07/2021 00:15	30	7	Dry	2021-07-30	2	00:15:00	00:00:00	23.2567	-25.5545	0.0955041	7392.67
KKR	31/07/2021 00:15	31	7	Dry	2021-07-31	2	00:15:00	00:00:00	23.2887	-25.559	1.24379	8598.48
KKR	01/08/2021 00:01	1	8	Dry	2021-08-01	2	00:01:00	00:00:00	23.3006	-25.5257	0.00345419	15931.7
KKR	02/08/2021 00:01	2	8	Dry	2021-08-02	2	00:01:00	00:00:00	23.3018	-25.5085	2.66067	16123.3
KKR	03/08/2021 00:15	3	8	Dry	2021-08-03	2	00:15:00	00:00:00	23.2681	-25.5167	0.553836	14585.1
KKR	04/08/2021 00:15	4	8	Dry	2021-08-04	2	00:15:00	00:00:00	23.3078	-25.5459	0.541774	4945.19
KKR	05/08/2021 00:15	5	8	Dry	2021-08-05	2	00:15:00	00:00:00	23.2978	-25.5649	0.225703	8228.71
KKR	06/08/2021 00:15	6	8	Dry	2021-08-06	2	00:15:00	00:00:00	23.2333	-25.5651	0.00280978	8857.65
KKR	07/08/2021 00:01	7	8	Dry	2021-08-07	2	00:01:00	00:00:00	23.2576	-25.5651	0.390003	7381.95
KKR	08/08/2021 00:15	8	8	Dry	2021-08-08	2	00:15:00	00:00:00	23.2638	-25.5684	0.916403	6819.03
KKR	09/08/2021 00:15	9	8	Dry	2021-08-09	2	00:15:00	00:00:00	23.2579	-25.5639	0.299171	4572.76
KKR	10/08/2021 00:15	10	8	Dry	2021-08-10	2	00:15:00	00:00:00	23.248	-25.5796	0.00627536	7760.58
KKR	11/08/2021 00:15	11	8	Dry	2021-08-11	2	00:15:00	00:00:00	23.264	-25.5861	0.622956	8462.52
KKR	12/08/2021 00:15	12	8	Dry	2021-08-12	2	00:15:00	00:00:00	23.2666	-25.5768	0.171502	5982.78
KKR	13/08/2021 00:15	13	8	Dry	2021-08-13	2	00:15:00	00:00:00	23.2534	-25.605	0.188106	8840.47
KKR	14/08/2021 00:15	14	8	Dry	2021-08-14	2	00:15:00	00:00:00	23.2693	-25.5839	0.250971	4100.58
KKR	15/08/2021 00:15	15	8	Dry	2021-08-15	2	00:15:00	00:00:00	23.2441	-25.5803	0.00242053	7550.19
KKR	16/08/2021 00:15	16	8	Dry	2021-08-16	2	00:15:00	00:00:00	23.2672	-25.5911	0.214463	6446.51
KKR	17/08/2021 00:15	17	8	Dry	2021-08-17	2	00:15:00	00:00:00	23.2753	-25.5782	0.758876	6307.38
KKR	18/08/2021 00:15	18	8	Dry	2021-08-18	2	00:15:00	00:00:00	23.269	-25.5862	0.847285	10031.9
KKR	19/08/2021 00:01	19	8	Dry	2021-08-19	2	00:01:00	00:00:00	23.2059	-25.6163	0.240229	7087.19
KKR	20/08/2021 00:15	20	8	Dry	2021-08-20	2	00:15:00	00:00:00	23.2294	-25.6245	0.79532	12343
KKR	21/08/2021 00:15	21	8	Dry	2021-08-21	2	00:15:00	00:00:00	23.2897	-25.5639	0.413108	8173.35
KKR	22/08/2021 00:15	22	8	Dry	2021-08-22	2	00:15:00	00:00:00	23.3115	-25.5226	0.453737	11517.5
KKR	23/08/2021 00:15	23	8	Dry	2021-08-23	2	00:15:00	00:00:00	23.2241	-25.4897	0.293528	6827.75
KKR	24/08/2021 00:15	24	8	Dry	2021-08-24	2	00:15:00	00:00:00	23.2563	-25.5046	0.850127	13615.7
KKR	25/08/2021 00:15	25	8	Dry	2021-08-25	2	00:15:00	00:00:00	23.248	-25.5791	0.11928	6602.55
KKR	26/08/2021 00:15	26	8	Dry	2021-08-26	2	00:15:00	00:00:00	23.2623	-25.5611	0.171556	3791.26
KKR	27/08/2021 00:15	27	8	Dry	2021-08-27	2	00:15:00	00:00:00	23.2378	-25.5566	0.164788	3344.12
KKR	28/08/2021 00:16	28	8	Dry	2021-08-28	2	00:16:00	00:00:00	23.232	-25.5625	0.174532	8198.43
KKR	29/08/2021 00:15	29	8	Dry	2021-08-29	2	00:15:00	00:00:00	23.2547	-25.5582	0.164812	7237.66
KKR	30/08/2021 00:15	30	8	Dry	2021-08-30	2	00:15:00	00:00:00	23.2606	-25.5616	0.449916	4754.88
KKR	31/08/2021 00:15	31	8	Dry	2021-08-31	2	00:15:00	00:00:00	23.2366	-25.5551	0.14692	7260.34

## Sheet: SPGR-Daily distance travelled
animal	timestamp	Day	Month	Season	Date	Phase	Time	Time.rounded.to.nearest.hour	lon	lat	speed	total_dist
SPGR	21/05/2016 06:00	21	5	Dry	2016-05-21	1	06:00:00	06:00:00	27.9855	-24.3103	0.399877	4172.82
SPGR	22/05/2016 01:00	22	5	Dry	2016-05-22	1	01:00:00	01:00:00	27.983	-24.2848	0.088865	3830.27
SPGR	23/05/2016 01:00	23	5	Dry	2016-05-23	1	01:00:00	01:00:00	27.9856	-24.2997	0.255671	4447.54
SPGR	24/05/2016 01:00	24	5	Dry	2016-05-24	1	01:00:00	01:00:00	27.9958	-24.2908	0.132378	5863.75
SPGR	25/05/2016 01:00	25	5	Dry	2016-05-25	1	01:00:00	01:00:00	27.9819	-24.2987	0.002319	4405.29
SPGR	26/05/2016 01:00	26	5	Dry	2016-05-26	1	01:00:00	01:00:00	27.9791	-24.2968	0.039459	3794.27
SPGR	27/05/2016 01:00	27	5	Dry	2016-05-27	1	01:00:00	01:00:00	27.976	-24.2898	0.467313	5380.21
SPGR	28/05/2016 01:00	28	5	Dry	2016-05-28	1	01:00:00	01:00:00	27.9766	-24.2944	0.081314	7773.01
SPGR	29/05/2016 01:00	29	5	Dry	2016-05-29	1	01:00:00	01:00:00	27.9795	-24.2825	0.130596	3809.83
SPGR	30/05/2016 01:00	30	5	Dry	2016-05-30	1	01:00:00	01:00:00	27.9677	-24.2949	0.015003	3823.58
SPGR	31/05/2016 01:00	31	5	Dry	2016-05-31	1	01:00:00	01:00:00	27.9793	-24.2847	0.007465	5100.62
SPGR	01/06/2016 01:00	1	6	Dry	2016-06-01	1	01:00:00	01:00:00	27.9782	-24.2842	0.051157	5217.76
SPGR	02/06/2016 01:00	2	6	Dry	2016-06-02	1	01:00:00	01:00:00	27.9902	-24.2915	0.108313	6252.61
SPGR	03/06/2016 01:00	3	6	Dry	2016-06-03	1	01:00:00	01:00:00	27.9761	-24.2941	0.237818	4382.74
SPGR	04/06/2016 01:00	4	6	Dry	2016-06-04	1	01:00:00	01:00:00	27.9743	-24.2939	0.013	3998.07
SPGR	05/06/2016 01:00	5	6	Dry	2016-06-05	1	01:00:00	01:00:00	27.9684	-24.2985	0.127988	6594.75
SPGR	06/06/2016 01:00	6	6	Dry	2016-06-06	1	01:00:00	01:00:00	27.9958	-24.3152	0.066216	6336.36
SPGR	07/06/2016 01:00	7	6	Dry	2016-06-07	1	01:00:00	01:00:00	27.997	-24.3343	0.491765	5747.29
SPGR	08/06/2016 01:00	8	6	Dry	2016-06-08	1	01:00:00	01:00:00	27.9837	-24.3375	0.209275	5025.99
SPGR	09/06/2016 01:00	9	6	Dry	2016-06-09	1	01:00:00	01:00:00	27.9715	-24.3287	0.230591	4486.75
SPGR	10/06/2016 01:00	10	6	Dry	2016-06-10	1	01:00:00	01:00:00	27.9707	-24.3471	0.128533	6241.43
SPGR	11/06/2016 01:00	11	6	Dry	2016-06-11	1	01:00:00	01:00:00	27.9746	-24.3444	0.002035	5788.14
SPGR	12/06/2016 01:00	12	6	Dry	2016-06-12	1	01:00:00	01:00:00	27.9729	-24.3356	0.007532	4953.19
SPGR	13/06/2016 01:00	13	6	Dry	2016-06-13	1	01:00:00	01:00:00	27.9685	-24.3414	0.005391	6056.03
SPGR	14/06/2016 01:00	14	6	Dry	2016-06-14	1	01:00:00	01:00:00	27.9628	-24.3463	0.315122	4810.25
SPGR	15/06/2016 01:00	15	6	Dry	2016-06-15	1	01:00:00	01:00:00	27.948	-24.3405	0.101187	3819.45
SPGR	16/06/2016 01:00	16	6	Dry	2016-06-16	1	01:00:00	01:00:00	27.9462	-24.3372	0.024134	4896.03
SPGR	17/06/2016 01:00	17	6	Dry	2016-06-17	1	01:00:00	01:00:00	27.9449	-24.3508	0.028433	6800.11
SPGR	18/06/2016 01:00	18	6	Dry	2016-06-18	1	01:00:00	01:00:00	27.9347	-24.3345	0.031696	7070.99
SPGR	19/06/2016 01:00	19	6	Dry	2016-06-19	1	01:00:00	01:00:00	27.9738	-24.325	0.007533	5428.08
SPGR	20/06/2016 01:00	20	6	Dry	2016-06-20	1	01:00:00	01:00:00	27.9875	-24.3217	0.243018	7459.84
SPGR	21/06/2016 01:00	21	6	Dry	2016-06-21	1	01:00:00	01:00:00	27.9996	-24.2973	0.242872	6249.38
SPGR	22/06/2016 01:00	22	6	Dry	2016-06-22	1	01:00:00	01:00:00	27.9973	-24.3184	0.194256	8153.38
SPGR	23/06/2016 01:00	23	6	Dry	2016-06-23	1	01:00:00	01:00:00	28.0223	-24.2925	0.092817	4882.72
SPGR	24/06/2016 01:00	24	6	Dry	2016-06-24	1	01:00:00	01:00:00	28.0251	-24.2929	0.082818	7121.81
SPGR	25/06/2016 01:00	25	6	Dry	2016-06-25	1	01:00:00	01:00:00	28.0217	-24.2924	0.214205	7379.31
SPGR	26/06/2016 01:00	26	6	Dry	2016-06-26	1	01:00:00	01:00:00	27.9887	-24.3191	0.039719	7483.62
SPGR	27/06/2016 01:00	27	6	Dry	2016-06-27	1	01:00:00	01:00:00	27.9488	-24.3433	0.081234	7066.07
SPGR	28/06/2016 01:00	28	6	Dry	2016-06-28	1	01:00:00	01:00:00	27.9556	-24.3399	0.086854	6612.72
SPGR	29/06/2016 01:00	29	6	Dry	2016-06-29	1	01:00:00	01:00:00	27.999	-24.3297	0.005554	7504.83
SPGR	30/06/2016 01:00	30	6	Dry	2016-06-30	1	01:00:00	01:00:00	28.0275	-24.2809	0.442178	4929.66
SPGR	01/07/2016 01:00	1	7	Dry	2016-07-01	1	01:00:00	01:00:00	28.0235	-24.2982	0.016938	5903.88
SPGR	02/07/2016 01:00	2	7	Dry	2016-07-02	1	01:00:00	01:00:00	28.0256	-24.2873	0.152103	6529.12
SPGR	03/07/2016 01:00	3	7	Dry	2016-07-03	1	01:00:00	01:00:00	28.0211	-24.2915	0	7579.4
SPGR	04/07/2016 01:00	4	7	Dry	2016-07-04	1	01:00:00	01:00:00	28.0278	-24.2857	0.098168	4420.06
SPGR	05/07/2016 01:00	5	7	Dry	2016-07-05	1	01:00:00	01:00:00	28.0245	-24.2887	0.127741	4841.81
SPGR	06/07/2016 01:00	6	7	Dry	2016-07-06	1	01:00:00	01:00:00	28.0252	-24.3015	0.005553	6828.94
SPGR	07/07/2016 01:00	7	7	Dry	2016-07-07	1	01:00:00	01:00:00	28.0262	-24.2847	0.067104	5018.43
SPGR	08/07/2016 01:00	8	7	Dry	2016-07-08	1	01:00:00	01:00:00	28.012	-24.3114	0.14216	5597.77
SPGR	09/07/2016 01:00	9	7	Dry	2016-07-09	1	01:00:00	01:00:00	28.0225	-24.3034	0.092743	5939.36
SPGR	10/07/2016 01:00	10	7	Dry	2016-07-10	1	01:00:00	01:00:00	28.0064	-24.3072	0.222795	8888.86
SPGR	11/07/2016 01:00	11	7	Dry	2016-07-11	1	01:00:00	01:00:00	27.9944	-24.295	1.62656	11914.3
SPGR	12/07/2016 01:00	12	7	Dry	2016-07-12	1	01:00:00	01:00:00	28.0243	-24.2974	0.006968	10239.3
SPGR	13/07/2016 01:00	13	7	Dry	2016-07-13	1	01:00:00	01:00:00	28.0069	-24.3094	0.047033	7947.78
SPGR	14/07/2016 01:00	14	7	Dry	2016-07-14	1	01:00:00	01:00:00	27.9886	-24.3097	0.021924	7068.28
SPGR	15/07/2016 01:00	15	7	Dry	2016-07-15	1	01:00:00	01:00:00	28.0222	-24.3044	0.062582	6200.47
SPGR	16/07/2016 01:00	16	7	Dry	2016-07-16	1	01:00:00	01:00:00	27.9988	-24.3274	0.010238	12342.6
SPGR	17/07/2016 01:00	17	7	Dry	2016-07-17	1	01:00:00	01:00:00	27.9837	-24.2838	0.002036	6513.98
SPGR	18/07/2016 01:00	18	7	Dry	2016-07-18	1	01:00:00	01:00:00	27.9556	-24.2842	0.411875	8796.74
SPGR	19/07/2016 01:00	19	7	Dry	2016-07-19	1	01:00:00	01:00:00	27.9469	-24.3173	0.102602	5591.85
SPGR	20/07/2016 01:00	20	7	Dry	2016-07-20	1	01:00:00	01:00:00	27.9635	-24.3428	0.019994	7105.22
SPGR	21/07/2016 01:00	21	7	Dry	2016-07-21	1	01:00:00	01:00:00	27.9909	-24.3388	0.47968	8829.36
SPGR	22/07/2016 01:00	22	7	Dry	2016-07-22	1	01:00:00	01:00:00	28.0264	-24.2989	0.047759	6576.42
SPGR	23/07/2016 01:00	23	7	Dry	2016-07-23	1	01:00:00	01:00:00	28.0265	-24.2879	0.139438	4460.2
SPGR	24/07/2016 01:00	24	7	Dry	2016-07-24	1	01:00:00	01:00:00	28.0252	-24.3003	0.065727	6306.1
SPGR	25/07/2016 01:00	25	7	Dry	2016-07-25	1	01:00:00	01:00:00	28.0149	-24.3161	0.077532	6542.5
SPGR	26/07/2016 01:00	26	7	Dry	2016-07-26	1	01:00:00	01:00:00	28.0045	-24.3151	0.061365	4316.44
SPGR	27/07/2016 01:00	27	7	Dry	2016-07-27	1	01:00:00	01:00:00	28.0153	-24.3153	0.15649	5467.15
SPGR	28/07/2016 01:00	28	7	Dry	2016-07-28	1	01:00:00	01:00:00	28.0203	-24.2944	0.092049	3898.38
SPGR	29/07/2016 01:00	29	7	Dry	2016-07-29	1	01:00:00	01:00:00	28.0244	-24.3017	0.162557	6438.82
SPGR	30/07/2016 01:00	30	7	Dry	2016-07-30	1	01:00:00	01:00:00	28.0229	-24.2972	0.067471	4490.15
SPGR	31/07/2016 01:00	31	7	Dry	2016-07-31	1	01:00:00	01:00:00	28.0216	-24.3062	0.030759	11029.5
SPGR	01/08/2016 01:00	1	8	Dry	2016-08-01	1	01:00:00	01:00:00	27.9924	-24.2675	0.501378	14752
SPGR	02/08/2016 01:00	2	8	Dry	2016-08-02	1	01:00:00	01:00:00	27.991	-24.3023	0.049548	9674.57
SPGR	03/08/2016 01:00	3	8	Dry	2016-08-03	1	01:00:00	01:00:00	28.0188	-24.3098	0.011519	5004.19
SPGR	04/08/2016 01:00	4	8	Dry	2016-08-04	1	01:00:00	01:00:00	28.0276	-24.2843	0.071809	5265.07
SPGR	05/08/2016 01:00	5	8	Dry	2016-08-05	1	01:00:00	01:00:00	28.026	-24.2843	0.101808	11369.9
SPGR	06/08/2016 01:00	6	8	Dry	2016-08-06	1	01:00:00	01:00:00	27.9545	-24.3239	0.352822	6249.37
SPGR	07/08/2016 01:00	7	8	Dry	2016-08-07	1	01:00:00	01:00:00	27.9484	-24.3137	0.055082	6654.74
SPGR	08/08/2016 01:00	8	8	Dry	2016-08-08	1	01:00:00	01:00:00	27.9514	-24.2835	0.289157	7653.8
SPGR	09/08/2016 01:00	9	8	Dry	2016-08-09	1	01:00:00	01:00:00	27.9777	-24.2829	0.053005	5070.69
SPGR	10/08/2016 01:00	10	8	Dry	2016-08-10	1	01:00:00	01:00:00	28.0044	-24.2914	0.003013	6582.16
SPGR	11/08/2016 01:00	11	8	Dry	2016-08-11	1	01:00:00	01:00:00	28.0283	-24.2849	0.094711	6498.68
SPGR	12/08/2016 01:00	12	8	Dry	2016-08-12	1	01:00:00	01:00:00	28.0041	-24.3168	0.068233	10643.5
SPGR	13/08/2016 01:00	13	8	Dry	2016-08-13	1	01:00:00	01:00:00	27.9462	-24.3143	0.059359	4512.95
SPGR	14/08/2016 01:00	14	8	Dry	2016-08-14	1	01:00:00	01:00:00	27.9448	-24.3243	0.293676	4990.75
SPGR	15/08/2016 01:00	15	8	Dry	2016-08-15	1	01:00:00	01:00:00	27.9554	-24.3454	0.519973	6591.85
SPGR	16/08/2016 01:00	16	8	Dry	2016-08-16	1	01:00:00	01:00:00	27.9468	-24.329	0.283998	4643.73
SPGR	17/08/2016 01:00	17	8	Dry	2016-08-17	1	01:00:00	01:00:00	27.9476	-24.3367	0.024436	4672.89
SPGR	18/08/2016 01:00	18	8	Dry	2016-08-18	1	01:00:00	01:00:00	27.9554	-24.3405	0.019621	7063.09
SPGR	19/08/2016 01:00	19	8	Dry	2016-08-19	1	01:00:00	01:00:00	27.9467	-24.3426	0.890722	4545.56
SPGR	20/08/2016 01:00	20	8	Dry	2016-08-20	1	01:00:00	01:00:00	27.9485	-24.338	0.196624	4266.63
SPGR	21/08/2016 01:00	21	8	Dry	2016-08-21	1	01:00:00	01:00:00	27.9621	-24.3488	0.568218	7560.59
SPGR	22/08/2016 01:00	22	8	Dry	2016-08-22	1	01:00:00	01:00:00	27.952	-24.3529	0.02274	5268.87
SPGR	23/08/2016 01:00	23	8	Dry	2016-08-23	1	01:00:00	01:00:00	27.9442	-24.3374	0.009396	6107.09
SPGR	24/08/2016 01:00	24	8	Dry	2016-08-24	1	01:00:00	01:00:00	27.9644	-24.3379	0.093173	8252.11
SPGR	25/08/2016 01:00	25	8	Dry	2016-08-25	1	01:00:00	01:00:00	27.97	-24.3253	0.054579	2797.37
SPGR	26/08/2016 00:06	26	8	Dry	2016-08-26	1	00:06:00	00:00:00	27.9731	-24.3263	0.020025	3853.4
SPGR	27/08/2016 00:02	27	8	Dry	2016-08-27	1	00:02:00	00:00:00	27.9792	-24.33	0.014043	3860.14
SPGR	28/08/2016 00:03	28	8	Dry	2016-08-28	1	00:03:00	00:00:00	27.9587	-24.3141	0.017942	3123.32
SPGR	29/08/2016 00:04	29	8	Dry	2016-08-29	1	00:04:00	00:00:00	27.9591	-24.3136	0.01459	5269.84
SPGR	30/08/2016 00:11	30	8	Dry	2016-08-30	1	00:11:00	00:00:00	27.9549	-24.3252	0	3432.89
SPGR	31/08/2016 00:15	31	8	Dry	2016-08-31	1	00:15:00	00:00:00	27.9642	-24.3272	0	4348.68
SPGR	01/11/2016 09:14	1	11	Wet	2016-11-01	1	09:14:00	09:00:00	28.0262	-24.2802	33.4736	7310.44
SPGR	02/11/2016 00:07	2	11	Wet	2016-11-02	1	00:07:00	00:00:00	28.0323	-24.2785	0.007955	7882.21
SPGR	03/11/2016 00:07	3	11	Wet	2016-11-03	1	00:07:00	00:00:00	28.0269	-24.2767	0.256628	6746.85
SPGR	04/11/2016 00:15	4	11	Wet	2016-11-04	1	00:15:00	00:00:00	28.0331	-24.2756	0.023045	6718.14
SPGR	05/11/2016 00:04	5	11	Wet	2016-11-05	1	00:04:00	00:00:00	28.0306	-24.2768	0.038692	7129.4
SPGR	06/11/2016 00:07	6	11	Wet	2016-11-06	1	00:07:00	00:00:00	28.0262	-24.2749	0.012764	8786.04
SPGR	07/11/2016 00:03	7	11	Wet	2016-11-07	1	00:03:00	00:00:00	28.0155	-24.2736	0.137887	7552.56
SPGR	08/11/2016 00:10	8	11	Wet	2016-11-08	1	00:10:00	00:00:00	28.0062	-24.2723	0.078226	8612.41
SPGR	09/11/2016 05:58	9	11	Wet	2016-11-09	1	05:58:00	06:00:00	28.031	-24.2783	25.1661	14762.3
SPGR	10/11/2016 00:11	10	11	Wet	2016-11-10	1	00:11:00	00:00:00	28.0223	-24.2799	1.7678	9749.36
SPGR	11/11/2016 00:10	11	11	Wet	2016-11-11	1	00:10:00	00:00:00	28.0115	-24.273	0.220832	7668.82
SPGR	12/11/2016 00:13	12	11	Wet	2016-11-12	1	00:13:00	00:00:00	28.0323	-24.2784	0.263932	8637.13
SPGR	13/11/2016 00:11	13	11	Wet	2016-11-13	1	00:11:00	00:00:00	28.0088	-24.2728	0.01893	6665.32
SPGR	14/11/2016 00:02	14	11	Wet	2016-11-14	1	00:02:00	00:00:00	28.0071	-24.2732	0.000911	6002.97
SPGR	15/11/2016 00:07	15	11	Wet	2016-11-15	1	00:07:00	00:00:00	28.0176	-24.2844	0.042351	6150.64
SPGR	16/11/2016 00:02	16	11	Wet	2016-11-16	1	00:02:00	00:00:00	28.0121	-24.2735	0.274015	8377.95
SPGR	17/11/2016 00:42	17	11	Wet	2016-11-17	1	00:42:00	01:00:00	28.0076	-24.2896	0.062685	6509.86
SPGR	18/11/2016 00:12	18	11	Wet	2016-11-18	1	00:12:00	00:00:00	28.0064	-24.2769	0.003143	7547.86
SPGR	19/11/2016 00:14	19	11	Wet	2016-11-19	1	00:14:00	00:00:00	28.0131	-24.2918	0.821519	12647.5
SPGR	20/11/2016 00:06	20	11	Wet	2016-11-20	1	00:06:00	00:00:00	28.0324	-24.2757	0.070824	6619.04
SPGR	21/11/2016 00:05	21	11	Wet	2016-11-21	1	00:05:00	00:00:00	28.0158	-24.3079	0.428162	7079.93
SPGR	22/11/2016 00:08	22	11	Wet	2016-11-22	1	00:08:00	00:00:00	28.0015	-24.3199	0.53741	16694.8
SPGR	23/11/2016 00:09	23	11	Wet	2016-11-23	1	00:09:00	00:00:00	28.0151	-24.316	2.00374	11861.7
SPGR	24/11/2016 00:06	24	11	Wet	2016-11-24	1	00:06:00	00:00:00	27.9988	-24.3245	0.035322	18908.3
SPGR	25/11/2016 00:03	25	11	Wet	2016-11-25	1	00:03:00	00:00:00	27.9866	-24.3141	0.005321	5717.81
SPGR	26/11/2016 00:06	26	11	Wet	2016-11-26	1	00:06:00	00:00:00	27.9863	-24.3178	0.088014	3675.79
SPGR	27/11/2016 00:09	27	11	Wet	2016-11-27	1	00:09:00	00:00:00	27.9769	-24.3114	0.046159	6508.51
SPGR	28/11/2016 00:03	28	11	Wet	2016-11-28	1	00:03:00	00:00:00	27.9803	-24.3297	0.002511	7297.87
SPGR	29/11/2016 00:14	29	11	Wet	2016-11-29	1	00:14:00	00:00:00	27.9967	-24.3289	0.305868	8883.33
SPGR	30/11/2016 00:10	30	11	Wet	2016-11-30	1	00:10:00	00:00:00	28.0062	-24.2934	0.003004	9310.11
SPGR	01/12/2016 00:08	1	12	Wet	2016-12-01	1	00:08:00	00:00:00	27.9928	-24.303	0.093692	8331.36
SPGR	02/12/2016 00:14	2	12	Wet	2016-12-02	1	00:14:00	00:00:00	28.0097	-24.3183	0.631154	6978.98
SPGR	03/12/2016 00:06	3	12	Wet	2016-12-03	1	00:06:00	00:00:00	27.9617	-24.314	0.447244	8768.91
SPGR	04/12/2016 00:10	4	12	Wet	2016-12-04	1	00:10:00	00:00:00	27.98	-24.3214	0.08808	7720.53
SPGR	05/12/2016 00:04	5	12	Wet	2016-12-05	1	00:04:00	00:00:00	27.9901	-24.3108	0.329185	4593.64
SPGR	06/12/2016 00:14	6	12	Wet	2016-12-06	1	00:14:00	00:00:00	27.984	-24.3181	0.009271	8008.51
SPGR	07/12/2016 00:07	7	12	Wet	2016-12-07	1	00:07:00	00:00:00	27.9792	-24.3209	0.067244	4748.64
SPGR	08/12/2016 00:05	8	12	Wet	2016-12-08	1	00:05:00	00:00:00	27.98	-24.3163	0.003279	9799.92
SPGR	09/12/2016 01:07	9	12	Wet	2016-12-09	1	01:07:00	01:00:00	28.0028	-24.3149	0.137722	6790.58
SPGR	10/12/2016 00:06	10	12	Wet	2016-12-10	1	00:06:00	00:00:00	27.9885	-24.3403	0.030418	6494.33
SPGR	11/12/2016 00:03	11	12	Wet	2016-12-11	1	00:03:00	00:00:00	27.9834	-24.3284	0.048271	9654.08
SPGR	12/12/2016 00:04	12	12	Wet	2016-12-12	1	00:04:00	00:00:00	27.9881	-24.3233	0.049706	7491.2
SPGR	13/12/2016 00:45	13	12	Wet	2016-12-13	1	00:45:00	01:00:00	27.9815	-24.3268	0.059754	7432.5
SPGR	14/12/2016 00:08	14	12	Wet	2016-12-14	1	00:08:00	00:00:00	27.9933	-24.3256	0.199375	4518.4
SPGR	15/12/2016 00:04	15	12	Wet	2016-12-15	1	00:04:00	00:00:00	27.9777	-24.3004	0.00291	7002
SPGR	16/12/2016 00:15	16	12	Wet	2016-12-16	1	00:15:00	00:00:00	27.9827	-24.3215	0.987313	14973.1
SPGR	17/12/2016 00:04	17	12	Wet	2016-12-17	1	00:04:00	00:00:00	27.9843	-24.2866	0.243372	7622.65
SPGR	18/12/2016 00:07	18	12	Wet	2016-12-18	1	00:07:00	00:00:00	27.9898	-24.3234	0.004212	6984.31
SPGR	19/12/2016 00:11	19	12	Wet	2016-12-19	1	00:11:00	00:00:00	27.9746	-24.3268	0.027267	8325.52
SPGR	20/12/2016 00:06	20	12	Wet	2016-12-20	1	00:06:00	00:00:00	27.971	-24.309	0.005133	5506.53
SPGR	21/12/2016 00:08	21	12	Wet	2016-12-21	1	00:08:00	00:00:00	27.9787	-24.3292	0.00312	5550.61
SPGR	22/12/2016 00:15	22	12	Wet	2016-12-22	1	00:15:00	00:00:00	27.9727	-24.3207	0.09464	7309.47
SPGR	23/12/2016 00:09	23	12	Wet	2016-12-23	1	00:09:00	00:00:00	27.9938	-24.3511	0.331006	8691.81
SPGR	24/12/2016 00:10	24	12	Wet	2016-12-24	1	00:10:00	00:00:00	27.9943	-24.3447	0.003287	7601.98
SPGR	25/12/2016 00:08	25	12	Wet	2016-12-25	1	00:08:00	00:00:00	27.9907	-24.3483	0.058708	7035.62
SPGR	26/12/2016 00:09	26	12	Wet	2016-12-26	1	00:09:00	00:00:00	27.9958	-24.3267	0.00086	5756.58
SPGR	27/12/2016 00:40	27	12	Wet	2016-12-27	1	00:40:00	01:00:00	27.9747	-24.333	0.006149	5974.49
SPGR	28/12/2016 00:10	28	12	Wet	2016-12-28	1	00:10:00	00:00:00	27.9774	-24.3121	0.010778	8914.86
SPGR	29/12/2016 00:11	29	12	Wet	2016-12-29	1	00:11:00	00:00:00	27.9579	-24.3579	0.390265	6215.02
SPGR	30/12/2016 00:07	30	12	Wet	2016-12-30	1	00:07:00	00:00:00	27.9568	-24.3329	0.024661	7459.33
SPGR	31/12/2016 00:12	31	12	Wet	2016-12-31	1	00:12:00	00:00:00	27.9573	-24.3278	0.024029	8851.64
SPGR	01/01/2017 01:00	1	1	Wet	2017-01-01	1	01:00:00	01:00:00	27.9745	-24.3395	0.046547	7867.44
SPGR	02/01/2017 01:00	2	1	Wet	2017-01-02	1	01:00:00	01:00:00	27.9871	-24.3471	0.003484	7214.18
SPGR	03/01/2017 01:00	3	1	Wet	2017-01-03	1	01:00:00	01:00:00	27.9598	-24.3569	0.009886	6787.56
SPGR	04/01/2017 01:00	4	1	Wet	2017-01-04	1	01:00:00	01:00:00	27.9618	-24.3575	0.036577	5668.11
SPGR	05/01/2017 01:00	5	1	Wet	2017-01-05	1	01:00:00	01:00:00	27.986	-24.3327	0.381688	9914.79
SPGR	06/01/2017 01:00	6	1	Wet	2017-01-06	1	01:00:00	01:00:00	28.028	-24.2803	0.190072	7590.73
SPGR	07/01/2017 01:00	7	1	Wet	2017-01-07	1	01:00:00	01:00:00	28.0069	-24.2818	1.32014	10235.7
SPGR	08/01/2017 01:00	8	1	Wet	2017-01-08	1	01:00:00	01:00:00	27.9651	-24.3022	0.211938	3876.71
SPGR	09/01/2017 01:00	9	1	Wet	2017-01-09	1	01:00:00	01:00:00	27.9447	-24.3162	0.002222	4941.76
SPGR	10/01/2017 01:00	10	1	Wet	2017-01-10	1	01:00:00	01:00:00	27.9586	-24.3242	0.103834	6739.08
SPGR	11/01/2017 01:00	11	1	Wet	2017-01-11	1	01:00:00	01:00:00	27.9498	-24.2956	0.002319	4178.98
SPGR	12/01/2017 01:00	12	1	Wet	2017-01-12	1	01:00:00	01:00:00	27.9475	-24.3095	0.453662	5505.49
SPGR	13/01/2017 01:00	13	1	Wet	2017-01-13	1	01:00:00	01:00:00	27.9539	-24.3003	0.021589	6530.81
SPGR	14/01/2017 01:00	14	1	Wet	2017-01-14	1	01:00:00	01:00:00	27.99	-24.2786	0.002221	7772.04
SPGR	15/01/2017 01:00	15	1	Wet	2017-01-15	1	01:00:00	01:00:00	28.0223	-24.2911	0.004639	6273.03
SPGR	16/01/2017 01:00	16	1	Wet	2017-01-16	1	01:00:00	01:00:00	28.0306	-24.2765	0.251929	7927.56
SPGR	17/01/2017 01:00	17	1	Wet	2017-01-17	1	01:00:00	01:00:00	27.972	-24.2882	0.209594	3094.7
SPGR	18/01/2017 01:00	18	1	Wet	2017-01-18	1	01:00:00	01:00:00	27.9716	-24.2913	0.001018	3576.47
SPGR	19/01/2017 01:00	19	1	Wet	2017-01-19	1	01:00:00	01:00:00	27.9723	-24.291	0.319044	6092.93
SPGR	20/01/2017 01:00	20	1	Wet	2017-01-20	1	01:00:00	01:00:00	27.9828	-24.298	0.130416	8517.3
SPGR	21/01/2017 01:00	21	1	Wet	2017-01-21	1	01:00:00	01:00:00	28.0259	-24.2897	0.188384	9243.81
SPGR	22/01/2017 01:00	22	1	Wet	2017-01-22	1	01:00:00	01:00:00	28.0031	-24.2816	0.073624	5490.62
SPGR	23/01/2017 01:00	23	1	Wet	2017-01-23	1	01:00:00	01:00:00	28.0065	-24.2742	0.002221	5188.03
SPGR	24/01/2017 01:00	24	1	Wet	2017-01-24	1	01:00:00	01:00:00	28.024	-24.2884	0.275227	18885.4
SPGR	25/01/2017 01:00	25	1	Wet	2017-01-25	1	01:00:00	01:00:00	28.009	-24.2931	0.016249	7635.61
SPGR	26/01/2017 01:00	26	1	Wet	2017-01-26	1	01:00:00	01:00:00	28.0088	-24.2971	0.781229	7024.16
SPGR	27/01/2017 01:00	27	1	Wet	2017-01-27	1	01:00:00	01:00:00	27.998	-24.2959	1.22283	10352.3
SPGR	28/01/2017 01:00	28	1	Wet	2017-01-28	1	01:00:00	01:00:00	28.0205	-24.2873	0.042803	11395.1
SPGR	29/01/2017 01:00	29	1	Wet	2017-01-29	1	01:00:00	01:00:00	27.9997	-24.2947	0.65032	7357.23
SPGR	30/01/2017 01:00	30	1	Wet	2017-01-30	1	01:00:00	01:00:00	28.0027	-24.2913	0.067753	5863.33
SPGR	31/01/2017 01:00	31	1	Wet	2017-01-31	1	01:00:00	01:00:00	27.9968	-24.2928	0.003905	4730.07
SPGR	01/02/2017 01:00	1	2	Wet	2017-02-01	1	01:00:00	01:00:00	27.9977	-24.2915	0.127757	8536.91
SPGR	02/02/2017 01:00	2	2	Wet	2017-02-02	1	01:00:00	01:00:00	27.9749	-24.2784	0.017138	3034.55
SPGR	03/02/2017 01:00	3	2	Wet	2017-02-03	1	01:00:00	01:00:00	27.9741	-24.2919	0.163227	6148.38
SPGR	04/02/2017 01:00	4	2	Wet	2017-02-04	1	01:00:00	01:00:00	27.9919	-24.3028	0.126334	5150.61
SPGR	05/02/2017 01:00	5	2	Wet	2017-02-05	1	01:00:00	01:00:00	27.9717	-24.2808	0.010182	5574.11
SPGR	06/02/2017 01:00	6	2	Wet	2017-02-06	1	01:00:00	01:00:00	27.9784	-24.3028	0.003905	5785.3
SPGR	07/02/2017 01:00	7	2	Wet	2017-02-07	1	01:00:00	01:00:00	27.9649	-24.2796	0.13914	5607.22
SPGR	08/02/2017 01:00	8	2	Wet	2017-02-08	1	01:00:00	01:00:00	27.9844	-24.2707	0.015943	5447.49
SPGR	09/02/2017 01:00	9	2	Wet	2017-02-09	1	01:00:00	01:00:00	27.9884	-24.2684	0.077548	8173.9
SPGR	10/02/2017 01:00	10	2	Wet	2017-02-10	1	01:00:00	01:00:00	27.9844	-24.2665	0.08815	7802.32
SPGR	11/02/2017 01:00	11	2	Wet	2017-02-11	1	01:00:00	01:00:00	27.9648	-24.2866	0.002036	8115.16
SPGR	12/02/2017 01:00	12	2	Wet	2017-02-12	1	01:00:00	01:00:00	27.9724	-24.325	0.022211	6780.31
SPGR	13/02/2017 01:00	13	2	Wet	2017-02-13	1	01:00:00	01:00:00	27.9838	-24.3217	0.541204	9443.11
SPGR	14/02/2017 00:01	14	2	Wet	2017-02-14	1	00:01:00	00:00:00	27.9733	-24.2818	0.170231	7803.23
SPGR	15/02/2017 01:00	15	2	Wet	2017-02-15	1	01:00:00	01:00:00	27.9825	-24.2689	0.130773	7664.8
SPGR	16/02/2017 01:00	16	2	Wet	2017-02-16	1	01:00:00	01:00:00	27.9851	-24.2874	0.067414	8427.28
SPGR	17/02/2017 01:00	17	2	Wet	2017-02-17	1	01:00:00	01:00:00	27.9694	-24.275	0.072651	7678.52
SPGR	18/02/2017 01:00	18	2	Wet	2017-02-18	1	01:00:00	01:00:00	27.9758	-24.2778	0.105105	6190.28
SPGR	19/02/2017 01:00	19	2	Wet	2017-02-19	1	01:00:00	01:00:00	27.9929	-24.273	0.004887	9751.29
SPGR	20/02/2017 01:00	20	2	Wet	2017-02-20	1	01:00:00	01:00:00	27.9681	-24.279	0.080375	5819.5
SPGR	21/02/2017 01:00	21	2	Wet	2017-02-21	1	01:00:00	01:00:00	27.9431	-24.3083	0.004639	6432.95
SPGR	22/02/2017 01:00	22	2	Wet	2017-02-22	1	01:00:00	01:00:00	27.9395	-24.3047	0.11509	7924.81
SPGR	23/02/2017 01:00	23	2	Wet	2017-02-23	1	01:00:00	01:00:00	27.971	-24.2752	0.166186	5580.46
SPGR	24/02/2017 01:00	24	2	Wet	2017-02-24	1	01:00:00	01:00:00	27.9952	-24.2744	0.214024	5809.22
SPGR	25/02/2017 01:00	25	2	Wet	2017-02-25	1	01:00:00	01:00:00	27.9854	-24.286	0.02249	8882.59
SPGR	26/02/2017 01:00	26	2	Wet	2017-02-26	1	01:00:00	01:00:00	27.9789	-24.3061	0.210247	11164.7
SPGR	27/02/2017 01:00	27	2	Wet	2017-02-27	1	01:00:00	01:00:00	27.9456	-24.2974	0.003054	5327.73
SPGR	28/02/2017 01:00	28	2	Wet	2017-02-28	1	01:00:00	01:00:00	27.9551	-24.2814	0.013561	6773.52
SPGR	01/05/2017 01:00	1	5	Dry	2017-05-01	1	01:00:00	01:00:00	27.9958	-24.2905	0.029241	8909.08
SPGR	02/05/2017 01:00	2	5	Dry	2017-05-02	1	01:00:00	01:00:00	28.0069	-24.2756	0.266311	8689.03
SPGR	03/05/2017 01:00	3	5	Dry	2017-05-03	1	01:00:00	01:00:00	28.0206	-24.3077	0.819089	10338.6
SPGR	04/05/2017 01:00	4	5	Dry	2017-05-04	1	01:00:00	01:00:00	27.9975	-24.2991	0.006886	5337.85
SPGR	05/05/2017 01:00	5	5	Dry	2017-05-05	1	01:00:00	01:00:00	27.9928	-24.3029	0.020268	8387.11
SPGR	06/05/2017 01:00	6	5	Dry	2017-05-06	1	01:00:00	01:00:00	28.0205	-24.3051	0.431046	8567.41
SPGR	07/05/2017 01:00	7	5	Dry	2017-05-07	1	01:00:00	01:00:00	28.0007	-24.2751	0.008801	7915.88
SPGR	08/05/2017 01:00	8	5	Dry	2017-05-08	1	01:00:00	01:00:00	28.016	-24.297	0.824927	7275.22
SPGR	09/05/2017 01:00	9	5	Dry	2017-05-09	1	01:00:00	01:00:00	28.0014	-24.2753	0.160848	7457.84
SPGR	10/05/2017 01:00	10	5	Dry	2017-05-10	1	01:00:00	01:00:00	28.0154	-24.2802	0.133925	5949.01
SPGR	11/05/2017 01:00	11	5	Dry	2017-05-11	1	01:00:00	01:00:00	27.9952	-24.286	0.150068	6635.43
SPGR	12/05/2017 01:00	12	5	Dry	2017-05-12	1	01:00:00	01:00:00	28.0242	-24.2937	0.565016	8599.69
SPGR	13/05/2017 01:00	13	5	Dry	2017-05-13	1	01:00:00	01:00:00	28.007	-24.273	0.021497	6307.1
SPGR	14/05/2017 01:00	14	5	Dry	2017-05-14	1	01:00:00	01:00:00	27.9526	-24.2827	0.227591	5597.33
SPGR	15/05/2017 01:00	15	5	Dry	2017-05-15	1	01:00:00	01:00:00	27.9596	-24.2971	0.061385	8623.59
SPGR	26/02/2021 01:00	26	2	Wet	2021-02-26	2	01:00:00	01:00:00	27.9325	-24.2989	0.134668	4474.66
SPGR	27/02/2021 01:00	27	2	Wet	2021-02-27	2	01:00:00	01:00:00	27.9452	-24.2846	0.018916	3526.48
SPGR	28/02/2021 01:00	28	2	Wet	2021-02-28	2	01:00:00	01:00:00	27.9334	-24.2957	0.012811	3333.93
SPGR	01/05/2021 01:00	1	5	Dry	2021-05-01	2	01:00:00	01:00:00	28.0049	-24.282	0.163576	4445.44
SPGR	02/05/2021 01:00	2	5	Dry	2021-05-02	2	01:00:00	01:00:00	27.9984	-24.29	0.054391	7560.68
SPGR	03/05/2021 01:00	3	5	Dry	2021-05-03	2	01:00:00	01:00:00	28.0224	-24.3015	0.195222	4817.93
SPGR	04/05/2021 01:00	4	5	Dry	2021-05-04	2	01:00:00	01:00:00	28.0182	-24.2877	0.129581	5751.7
SPGR	05/05/2021 01:00	5	5	Dry	2021-05-05	2	01:00:00	01:00:00	28.023	-24.3008	0.089585	6517.68
SPGR	06/05/2021 01:00	6	5	Dry	2021-05-06	2	01:00:00	01:00:00	27.9939	-24.3234	0.132964	5629.13
SPGR	07/05/2021 01:00	7	5	Dry	2021-05-07	2	01:00:00	01:00:00	27.9825	-24.302	0.005915	6406.51
SPGR	08/05/2021 01:00	8	5	Dry	2021-05-08	2	01:00:00	01:00:00	28.0247	-24.3014	0	4989.42
SPGR	09/05/2021 01:00	9	5	Dry	2021-05-09	2	01:00:00	01:00:00	28.0145	-24.2741	0.005554	5191.54
SPGR	10/05/2021 01:00	10	5	Dry	2021-05-10	2	01:00:00	01:00:00	27.9839	-24.2709	0.004639	4862.5
SPGR	11/05/2021 01:00	11	5	Dry	2021-05-11	2	01:00:00	01:00:00	27.967	-24.2759	0.506122	4818.98
SPGR	12/05/2021 01:00	12	5	Dry	2021-05-12	2	01:00:00	01:00:00	27.9825	-24.2684	0.096294	4291.97
SPGR	13/05/2021 01:00	13	5	Dry	2021-05-13	2	01:00:00	01:00:00	27.9826	-24.2679	0.061631	4670.6
SPGR	14/05/2021 01:00	14	5	Dry	2021-05-14	2	01:00:00	01:00:00	27.981	-24.271	0	5682.49
SPGR	15/05/2021 01:00	15	5	Dry	2021-05-15	2	01:00:00	01:00:00	27.9454	-24.2839	0.22747	6047.03
SPGR	16/05/2021 01:00	16	5	Dry	2021-05-16	2	01:00:00	01:00:00	27.9836	-24.2722	0.126846	7237.95
SPGR	17/05/2021 01:00	17	5	Dry	2021-05-17	2	01:00:00	01:00:00	28.017	-24.2784	0.002444	6097.81
SPGR	18/05/2021 01:00	18	5	Dry	2021-05-18	2	01:00:00	01:00:00	28.0011	-24.271	0.05014	6053.48
SPGR	19/05/2021 01:00	19	5	Dry	2021-05-19	2	01:00:00	01:00:00	27.9614	-24.2852	0.00452	4803.01
SPGR	20/05/2021 01:00	20	5	Dry	2021-05-20	2	01:00:00	01:00:00	27.9724	-24.2922	0.005554	4984.44
SPGR	21/05/2021 01:00	21	5	Dry	2021-05-21	2	01:00:00	01:00:00	27.9811	-24.271	0.075099	4806.41
SPGR	22/05/2021 01:00	22	5	Dry	2021-05-22	2	01:00:00	01:00:00	27.9852	-24.2667	0.19332	7367.3
SPGR	23/05/2021 01:00	23	5	Dry	2021-05-23	2	01:00:00	01:00:00	27.9853	-24.3099	0.827271	8178.44
SPGR	24/05/2021 01:00	24	5	Dry	2021-05-24	2	01:00:00	01:00:00	27.957	-24.3255	0.246164	5221.42
SPGR	25/05/2021 01:00	25	5	Dry	2021-05-25	2	01:00:00	01:00:00	27.95	-24.3198	0.443371	4296.21
SPGR	26/05/2021 01:00	26	5	Dry	2021-05-26	2	01:00:00	01:00:00	27.9522	-24.304	0.036066	6668.89
SPGR	27/05/2021 01:00	27	5	Dry	2021-05-27	2	01:00:00	01:00:00	27.9803	-24.3305	0.109159	5118.05
SPGR	28/05/2021 01:00	28	5	Dry	2021-05-28	2	01:00:00	01:00:00	27.9888	-24.3275	0.084569	7858.45
SPGR	29/05/2021 01:00	29	5	Dry	2021-05-29	2	01:00:00	01:00:00	27.9478	-24.3423	0.009396	5117.96
SPGR	30/05/2021 01:00	30	5	Dry	2021-05-30	2	01:00:00	01:00:00	27.9443	-24.3115	0.386768	8736.42
SPGR	31/05/2021 01:00	31	5	Dry	2021-05-31	2	01:00:00	01:00:00	27.978	-24.2942	0.024436	5871.39
SPGR	01/06/2021 01:00	1	6	Dry	2021-06-01	2	01:00:00	01:00:00	27.9816	-24.2683	0.043591	6366.19
SPGR	02/06/2021 01:00	2	6	Dry	2021-06-02	2	01:00:00	01:00:00	27.9921	-24.3029	0.065982	8243.12
SPGR	03/06/2021 01:00	3	6	Dry	2021-06-03	2	01:00:00	01:00:00	28.0068	-24.3137	0.057547	6026.71
SPGR	04/06/2021 01:00	4	6	Dry	2021-06-04	2	01:00:00	01:00:00	28.0281	-24.2854	0.01139	5137.69
SPGR	05/06/2021 01:00	5	6	Dry	2021-06-05	2	01:00:00	01:00:00	28.0188	-24.2745	0.069765	5414.55
SPGR	06/06/2021 01:00	6	6	Dry	2021-06-06	2	01:00:00	01:00:00	28.0262	-24.2886	0.077995	5340.19
SPGR	07/06/2021 01:00	7	6	Dry	2021-06-07	2	01:00:00	01:00:00	28.0252	-24.3011	0.10465	5882.32
SPGR	08/06/2021 01:00	8	6	Dry	2021-06-08	2	01:00:00	01:00:00	27.9981	-24.3166	0.069946	5791.67
SPGR	09/06/2021 01:00	9	6	Dry	2021-06-09	2	01:00:00	01:00:00	28.0248	-24.3007	0.006026	6803.48
SPGR	10/06/2021 01:00	10	6	Dry	2021-06-10	2	01:00:00	01:00:00	28.0219	-24.2747	0.0088	5017.42
SPGR	11/06/2021 01:00	11	6	Dry	2021-06-11	2	01:00:00	01:00:00	28.0148	-24.2844	0.083085	6967.96
SPGR	12/06/2021 01:00	12	6	Dry	2021-06-12	2	01:00:00	01:00:00	27.989	-24.2947	0.004072	9585.2
SPGR	13/06/2021 01:00	13	6	Dry	2021-06-13	2	01:00:00	01:00:00	27.9955	-24.2954	0.003332	5294.42
SPGR	14/06/2021 01:00	14	6	Dry	2021-06-14	2	01:00:00	01:00:00	27.9674	-24.2957	0.006338	5767.29
SPGR	15/06/2021 01:00	15	6	Dry	2021-06-15	2	01:00:00	01:00:00	27.9423	-24.3159	0.003054	8622.33
SPGR	16/06/2021 01:00	16	6	Dry	2021-06-16	2	01:00:00	01:00:00	27.9846	-24.3291	0.316842	6522.75
SPGR	17/06/2021 01:00	17	6	Dry	2021-06-17	2	01:00:00	01:00:00	27.948	-24.3426	0.005261	5602.9
SPGR	18/06/2021 01:00	18	6	Dry	2021-06-18	2	01:00:00	01:00:00	27.9603	-24.3163	0.006969	8254.69
SPGR	19/06/2021 01:00	19	6	Dry	2021-06-19	2	01:00:00	01:00:00	28.0021	-24.3169	0.177091	7513.66
SPGR	20/06/2021 01:00	20	6	Dry	2021-06-20	2	01:00:00	01:00:00	27.9558	-24.3405	0.04053	5770.37
SPGR	21/06/2021 01:00	21	6	Dry	2021-06-21	2	01:00:00	01:00:00	27.9767	-24.3189	0.005553	7796.43
SPGR	22/06/2021 01:00	22	6	Dry	2021-06-22	2	01:00:00	01:00:00	28.0064	-24.2751	0.099984	5867.74
SPGR	23/06/2021 01:00	23	6	Dry	2021-06-23	2	01:00:00	01:00:00	27.9831	-24.2684	0.012218	5573.54
SPGR	24/06/2021 01:00	24	6	Dry	2021-06-24	2	01:00:00	01:00:00	27.9936	-24.2837	0.096739	6751.06
SPGR	25/06/2021 01:00	25	6	Dry	2021-06-25	2	01:00:00	01:00:00	28.009	-24.2806	0.372456	6111.28
SPGR	26/06/2021 01:00	26	6	Dry	2021-06-26	2	01:00:00	01:00:00	28.0287	-24.2833	0.008442	6382.05
SPGR	27/06/2021 01:00	27	6	Dry	2021-06-27	2	01:00:00	01:00:00	28.0072	-24.2835	0.492726	6879.72
SPGR	28/06/2021 01:00	28	6	Dry	2021-06-28	2	01:00:00	01:00:00	27.9495	-24.2946	0.149535	6365.73
SPGR	29/06/2021 01:00	29	6	Dry	2021-06-29	2	01:00:00	01:00:00	27.9799	-24.2809	0.310536	4518.3
SPGR	30/06/2021 01:00	30	6	Dry	2021-06-30	2	01:00:00	01:00:00	27.9781	-24.2954	0.183532	7921.56
SPGR	01/07/2021 01:00	1	7	Dry	2021-07-01	2	01:00:00	01:00:00	28.0152	-24.2746	0.058575	6148.72
SPGR	02/07/2021 01:00	2	7	Dry	2021-07-02	2	01:00:00	01:00:00	28.0182	-24.2883	0.025451	5891.4
SPGR	03/07/2021 01:00	3	7	Dry	2021-07-03	2	01:00:00	01:00:00	28.0115	-24.3207	0.005915	5144.67
SPGR	04/07/2021 01:00	4	7	Dry	2021-07-04	2	01:00:00	01:00:00	28.0218	-24.3051	0.06679	3864.29
SPGR	05/07/2021 01:00	5	7	Dry	2021-07-05	2	01:00:00	01:00:00	28.0269	-24.2839	0	4628.64
SPGR	06/07/2021 01:00	6	7	Dry	2021-07-06	2	01:00:00	01:00:00	28.022	-24.2977	0.027788	6254.99
SPGR	07/07/2021 01:00	7	7	Dry	2021-07-07	2	01:00:00	01:00:00	27.9909	-24.3227	0.02262	7102.38
SPGR	08/07/2021 01:00	8	7	Dry	2021-07-08	2	01:00:00	01:00:00	27.9584	-24.3255	0.019014	4628.49
SPGR	09/07/2021 01:00	9	7	Dry	2021-07-09	2	01:00:00	01:00:00	27.9704	-24.3255	0.011293	5484.2
SPGR	10/07/2021 01:00	10	7	Dry	2021-07-10	2	01:00:00	01:00:00	27.9581	-24.3126	0.089373	6837.69
SPGR	11/07/2021 01:00	11	7	Dry	2021-07-11	2	01:00:00	01:00:00	27.9879	-24.2736	0.007534	7549.92
SPGR	12/07/2021 01:00	12	7	Dry	2021-07-12	2	01:00:00	01:00:00	28.025	-24.2757	0.090036	5784.04
SPGR	13/07/2021 01:00	13	7	Dry	2021-07-13	2	01:00:00	01:00:00	28.0163	-24.3064	0.464501	5490.97
SPGR	14/07/2021 01:00	14	7	Dry	2021-07-14	2	01:00:00	01:00:00	28.0138	-24.289	0.100068	5759.83
SPGR	15/07/2021 01:00	15	7	Dry	2021-07-15	2	01:00:00	01:00:00	28.0126	-24.2768	0.708081	7138.23
SPGR	16/07/2021 01:00	16	7	Dry	2021-07-16	2	01:00:00	01:00:00	27.9629	-24.2785	0.059055	6723.55
SPGR	17/07/2021 01:00	17	7	Dry	2021-07-17	2	01:00:00	01:00:00	27.9441	-24.2854	0.096773	5747.31
SPGR	18/07/2021 01:00	18	7	Dry	2021-07-18	2	01:00:00	01:00:00	27.9512	-24.3168	0.103574	3956.81
SPGR	19/07/2021 01:00	19	7	Dry	2021-07-19	2	01:00:00	01:00:00	27.9546	-24.2963	0.015115	6347.14
SPGR	20/07/2021 01:00	20	7	Dry	2021-07-20	2	01:00:00	01:00:00	27.9716	-24.2914	0.015904	4493.37
SPGR	21/07/2021 01:00	21	7	Dry	2021-07-21	2	01:00:00	01:00:00	27.952	-24.2826	0.476876	7134.72
SPGR	22/07/2021 01:00	22	7	Dry	2021-07-22	2	01:00:00	01:00:00	27.9894	-24.2924	0.068518	7125.64
SPGR	23/07/2021 01:00	23	7	Dry	2021-07-23	2	01:00:00	01:00:00	28.0107	-24.2734	0.329971	5158.01
SPGR	24/07/2021 01:00	24	7	Dry	2021-07-24	2	01:00:00	01:00:00	27.983	-24.2683	0.180723	5451.92
SPGR	25/07/2021 01:00	25	7	Dry	2021-07-25	2	01:00:00	01:00:00	27.9423	-24.2863	0.13584	7701.2
SPGR	26/07/2021 01:00	26	7	Dry	2021-07-26	2	01:00:00	01:00:00	27.9461	-24.2834	0.14551	8968.6
SPGR	27/07/2021 01:00	27	7	Dry	2021-07-27	2	01:00:00	01:00:00	27.9818	-24.2689	0.269892	7886.9
SPGR	28/07/2021 01:00	28	7	Dry	2021-07-28	2	01:00:00	01:00:00	28.019	-24.2875	0.135046	6904.34
SPGR	29/07/2021 01:00	29	7	Dry	2021-07-29	2	01:00:00	01:00:00	28.0273	-24.2959	0.11329	5202.28
SPGR	30/07/2021 01:00	30	7	Dry	2021-07-30	2	01:00:00	01:00:00	28.0275	-24.2963	0.10125	5544.13
SPGR	31/07/2021 01:00	31	7	Dry	2021-07-31	2	01:00:00	01:00:00	28.0239	-24.2948	0.795949	6823.41
SPGR	01/08/2021 01:00	1	8	Dry	2021-08-01	2	01:00:00	01:00:00	28.0061	-24.3022	0.145711	5613.62
SPGR	02/08/2021 01:00	2	8	Dry	2021-08-02	2	01:00:00	01:00:00	28.0224	-24.3039	0.071263	4115.16
SPGR	03/08/2021 01:00	3	8	Dry	2021-08-03	2	01:00:00	01:00:00	28.0177	-24.3111	0.003332	8041.12
SPGR	04/08/2021 01:00	4	8	Dry	2021-08-04	2	01:00:00	01:00:00	28.0169	-24.2786	0.00975	6947.72
SPGR	05/08/2021 01:00	5	8	Dry	2021-08-05	2	01:00:00	01:00:00	27.996	-24.2961	0.166173	8253.24
SPGR	06/08/2021 01:00	6	8	Dry	2021-08-06	2	01:00:00	01:00:00	28.0081	-24.2969	0.104437	6938.05
SPGR	07/08/2021 01:00	7	8	Dry	2021-08-07	2	01:00:00	01:00:00	28.0051	-24.2807	0.258216	7423.42
SPGR	08/08/2021 01:00	8	8	Dry	2021-08-08	2	01:00:00	01:00:00	27.9861	-24.3131	0.392239	7457.3
SPGR	09/08/2021 01:00	9	8	Dry	2021-08-09	2	01:00:00	01:00:00	27.9801	-24.3375	0.019142	7050.28
SPGR	10/08/2021 01:00	10	8	Dry	2021-08-10	2	01:00:00	01:00:00	27.9729	-24.3091	0.002222	7727.13
SPGR	11/08/2021 01:00	11	8	Dry	2021-08-11	2	01:00:00	01:00:00	28.023	-24.2956	0.184837	8204.39
SPGR	12/08/2021 01:00	12	8	Dry	2021-08-12	2	01:00:00	01:00:00	28.0029	-24.2839	0.165274	9559.25
SPGR	13/08/2021 01:00	13	8	Dry	2021-08-13	2	01:00:00	01:00:00	28.0066	-24.2812	0.247486	8453.9
SPGR	14/08/2021 01:00	14	8	Dry	2021-08-14	2	01:00:00	01:00:00	28	-24.2815	0.01126	4762.4
SPGR	15/08/2021 01:00	15	8	Dry	2021-08-15	2	01:00:00	01:00:00	27.9778	-24.2967	0.04193	8397.8
SPGR	16/08/2021 01:00	16	8	Dry	2021-08-16	2	01:00:00	01:00:00	28.0015	-24.2801	0.13437	7909.15
SPGR	17/08/2021 01:00	17	8	Dry	2021-08-17	2	01:00:00	01:00:00	27.9785	-24.3096	0.111797	11815.8
SPGR	18/08/2021 01:00	18	8	Dry	2021-08-18	2	01:00:00	01:00:00	28.0099	-24.2918	0.321534	8659.13
SPGR	19/08/2021 01:00	19	8	Dry	2021-08-19	2	01:00:00	01:00:00	28.0028	-24.2912	0.161061	7275.11
SPGR	20/08/2021 01:00	20	8	Dry	2021-08-20	2	01:00:00	01:00:00	27.9965	-24.275	0.006968	6582.67
SPGR	21/08/2021 01:00	21	8	Dry	2021-08-21	2	01:00:00	01:00:00	27.9852	-24.271	0.020661	7043.83
SPGR	22/08/2021 01:00	22	8	Dry	2021-08-22	2	01:00:00	01:00:00	27.9705	-24.2794	0.242019	10118.2
SPGR	23/08/2021 01:00	23	8	Dry	2021-08-23	2	01:00:00	01:00:00	28.0002	-24.2824	0.518081	7151.28
SPGR	24/08/2021 01:00	24	8	Dry	2021-08-24	2	01:00:00	01:00:00	27.9688	-24.3055	0.222408	4722.47
SPGR	25/08/2021 01:00	25	8	Dry	2021-08-25	2	01:00:00	01:00:00	27.9502	-24.3172	0.401369	9137.31
SPGR	26/08/2021 01:00	26	8	Dry	2021-08-26	2	01:00:00	01:00:00	27.9954	-24.2687	0.170743	6908.29
SPGR	27/08/2021 01:00	27	8	Dry	2021-08-27	2	01:00:00	01:00:00	27.9796	-24.2965	0.002036	6255.58
SPGR	28/08/2021 01:00	28	8	Dry	2021-08-28	2	01:00:00	01:00:00	27.9644	-24.306	0.003484	5459.92
SPGR	29/08/2021 01:00	29	8	Dry	2021-08-29	2	01:00:00	01:00:00	27.9485	-24.3005	0.020361	8719.84
SPGR	30/08/2021 01:00	30	8	Dry	2021-08-30	2	01:00:00	01:00:00	27.9545	-24.2962	0.117455	8302.64
SPGR	31/08/2021 01:00	31	8	Dry	2021-08-31	2	01:00:00	01:00:00	27.9588	-24.2858	0.361925	8960.64
SPGR	01/11/2021 01:00	1	11	Wet	2021-11-01	2	01:00:00	01:00:00	28.0228	-24.2755	0.013649	9130.76
SPGR	02/11/2021 01:00	2	11	Wet	2021-11-02	2	01:00:00	01:00:00	27.95	-24.2835	0	4430.84
SPGR	03/11/2021 01:00	3	11	Wet	2021-11-03	2	01:00:00	01:00:00	27.9707	-24.2789	0.009859	6844.91
SPGR	04/11/2021 01:00	4	11	Wet	2021-11-04	2	01:00:00	01:00:00	28.013	-24.2752	0.18327	8445.95
SPGR	05/11/2021 01:00	5	11	Wet	2021-11-05	2	01:00:00	01:00:00	28.0047	-24.3148	0.005554	9709.5
SPGR	06/11/2021 01:00	6	11	Wet	2021-11-06	2	01:00:00	01:00:00	27.9374	-24.3521	0.002444	4811.07
SPGR	07/11/2021 01:00	7	11	Wet	2021-11-07	2	01:00:00	01:00:00	27.9211	-24.3423	0.006083	8685.87
SPGR	08/11/2021 01:00	8	11	Wet	2021-11-08	2	01:00:00	01:00:00	27.9792	-24.3414	0.011389	6800.55
SPGR	09/11/2021 01:00	9	11	Wet	2021-11-09	2	01:00:00	01:00:00	27.979	-24.3311	0.022391	12788.4
SPGR	10/11/2021 01:00	10	11	Wet	2021-11-10	2	01:00:00	01:00:00	27.9674	-24.3314	0.025444	7815.9
SPGR	11/11/2021 01:00	11	11	Wet	2021-11-11	2	01:00:00	01:00:00	27.9481	-24.3428	0.003249	5379.1
SPGR	12/11/2021 01:00	12	11	Wet	2021-11-12	2	01:00:00	01:00:00	27.9768	-24.319	0.373781	7148.65
SPGR	13/11/2021 01:00	13	11	Wet	2021-11-13	2	01:00:00	01:00:00	27.957	-24.3492	0.005554	5894.61
SPGR	14/11/2021 01:01	14	11	Wet	2021-11-14	2	01:01:00	01:00:00	27.9598	-24.3568	0.005646	4845.97
SPGR	15/11/2021 01:00	15	11	Wet	2021-11-15	2	01:00:00	01:00:00	27.9713	-24.3388	0.002035	4599.04
SPGR	16/11/2021 01:00	16	11	Wet	2021-11-16	2	01:00:00	01:00:00	27.9493	-24.3429	0.012263	6593.37
SPGR	17/11/2021 01:00	17	11	Wet	2021-11-17	2	01:00:00	01:00:00	27.9479	-24.2997	0.269105	6045.14
SPGR	18/11/2021 01:00	18	11	Wet	2021-11-18	2	01:00:00	01:00:00	27.9721	-24.2829	0.160425	6810.93
SPGR	19/11/2021 01:00	19	11	Wet	2021-11-19	2	01:00:00	01:00:00	27.9663	-24.3118	0.003905	5058.43
SPGR	20/11/2021 01:00	20	11	Wet	2021-11-20	2	01:00:00	01:00:00	27.9412	-24.3161	0.003013	8307.3
SPGR	21/11/2021 01:00	21	11	Wet	2021-11-21	2	01:00:00	01:00:00	27.9416	-24.302	0.026648	10119.7
SPGR	22/11/2021 01:00	22	11	Wet	2021-11-22	2	01:00:00	01:00:00	27.9717	-24.3032	0.024937	4845.39
SPGR	23/11/2021 01:00	23	11	Wet	2021-11-23	2	01:00:00	01:00:00	27.9696	-24.3255	0.015731	6822.73
SPGR	24/11/2021 01:00	24	11	Wet	2021-11-24	2	01:00:00	01:00:00	27.9482	-24.3234	0.006756	4908.93
SPGR	25/11/2021 01:00	25	11	Wet	2021-11-25	2	01:00:00	01:00:00	27.9506	-24.3169	0.002222	7981.38
SPGR	26/11/2021 01:00	26	11	Wet	2021-11-26	2	01:00:00	01:00:00	27.9387	-24.3463	0.263499	4731.18
SPGR	27/11/2021 01:00	27	11	Wet	2021-11-27	2	01:00:00	01:00:00	27.9313	-24.3274	0.123537	6357.25
SPGR	28/11/2021 01:00	28	11	Wet	2021-11-28	2	01:00:00	01:00:00	27.927	-24.3125	0.081319	8338.37
SPGR	29/11/2021 01:00	29	11	Wet	2021-11-29	2	01:00:00	01:00:00	27.9488	-24.3314	0.085664	5099.01
SPGR	30/11/2021 01:00	30	11	Wet	2021-11-30	2	01:00:00	01:00:00	27.95	-24.3439	0.1024	7160.84
SPGR	01/12/2021 01:00	1	12	Wet	2021-12-01	2	01:00:00	01:00:00	27.9554	-24.3454	0.004558	5904.46
SPGR	02/12/2021 01:00	2	12	Wet	2021-12-02	2	01:00:00	01:00:00	27.9448	-24.3159	0.003905	7566.97
SPGR	03/12/2021 01:00	3	12	Wet	2021-12-03	2	01:00:00	01:00:00	27.943	-24.3086	0.00452	7076.88
SPGR	04/12/2021 01:00	4	12	Wet	2021-12-04	2	01:00:00	01:00:00	27.9403	-24.3473	0.051824	7963.32
SPGR	05/12/2021 01:00	5	12	Wet	2021-12-05	2	01:00:00	01:00:00	27.9825	-24.3628	0.163598	5670.9
SPGR	06/12/2021 01:00	6	12	Wet	2021-12-06	2	01:00:00	01:00:00	27.9898	-24.3463	0.318832	6952.6
SPGR	07/12/2021 01:00	7	12	Wet	2021-12-07	2	01:00:00	01:00:00	27.9387	-24.339	0.002444	6059.88
SPGR	08/12/2021 01:00	8	12	Wet	2021-12-08	2	01:00:00	01:00:00	27.9445	-24.304	0.028536	10194.1
SPGR	09/12/2021 01:00	9	12	Wet	2021-12-09	2	01:00:00	01:00:00	27.9631	-24.3088	0.006338	8017.55
SPGR	10/12/2021 01:00	10	12	Wet	2021-12-10	2	01:00:00	01:00:00	27.9762	-24.3171	0.005553	5925.85
SPGR	11/12/2021 01:00	11	12	Wet	2021-12-11	2	01:00:00	01:00:00	27.9433	-24.3143	0.012167	4814.61
SPGR	12/12/2021 01:00	12	12	Wet	2021-12-12	2	01:00:00	01:00:00	27.9436	-24.3148	0.055747	5469.65
SPGR	13/12/2021 01:00	13	12	Wet	2021-12-13	2	01:00:00	01:00:00	27.9654	-24.3124	0.035339	7705.4
SPGR	14/12/2021 01:00	14	12	Wet	2021-12-14	2	01:00:00	01:00:00	27.9829	-24.322	0.130477	7319.44
SPGR	15/12/2021 01:00	15	12	Wet	2021-12-15	2	01:00:00	01:00:00	27.9458	-24.3171	0.148681	9326.31
SPGR	16/12/2021 01:00	16	12	Wet	2021-12-16	2	01:00:00	01:00:00	27.9808	-24.2725	0.008037	6295.45
SPGR	17/12/2021 01:00	17	12	Wet	2021-12-17	2	01:00:00	01:00:00	27.9442	-24.2939	0.03055	6424.59
SPGR	18/12/2021 01:00	18	12	Wet	2021-12-18	2	01:00:00	01:00:00	27.9331	-24.2992	0.036063	2967.63
SPGR	19/12/2021 01:00	19	12	Wet	2021-12-19	2	01:00:00	01:00:00	27.9301	-24.2965	0.304203	4448.01
SPGR	20/12/2021 01:00	20	12	Wet	2021-12-20	2	01:00:00	01:00:00	27.9238	-24.3027	0.01535	4990.82
SPGR	21/12/2021 01:00	21	12	Wet	2021-12-21	2	01:00:00	01:00:00	27.9333	-24.3054	0.100576	3703.15
SPGR	22/12/2021 01:00	22	12	Wet	2021-12-22	2	01:00:00	01:00:00	27.9334	-24.3054	0.002222	3391.35
SPGR	23/12/2021 01:00	23	12	Wet	2021-12-23	2	01:00:00	01:00:00	27.9409	-24.2984	0.017668	3245.05
SPGR	24/12/2021 01:00	24	12	Wet	2021-12-24	2	01:00:00	01:00:00	27.9318	-24.3081	0.094556	3865.28
SPGR	25/12/2021 01:00	25	12	Wet	2021-12-25	2	01:00:00	01:00:00	27.9425	-24.2981	0.005915	7610.1
SPGR	26/12/2021 01:00	26	12	Wet	2021-12-26	2	01:00:00	01:00:00	27.9781	-24.3003	0.19307	5101.55
SPGR	27/12/2021 01:00	27	12	Wet	2021-12-27	2	01:00:00	01:00:00	27.9654	-24.3039	0.231963	6026.71
SPGR	28/12/2021 01:00	28	12	Wet	2021-12-28	2	01:00:00	01:00:00	27.9458	-24.2983	0.088759	3815.08
SPGR	29/12/2021 01:00	29	12	Wet	2021-12-29	2	01:00:00	01:00:00	27.9513	-24.2887	0.278512	5066.32
SPGR	30/12/2021 01:00	30	12	Wet	2021-12-30	2	01:00:00	01:00:00	27.9556	-24.2835	0	6288.66
SPGR	31/12/2021 01:00	31	12	Wet	2021-12-31	2	01:00:00	01:00:00	27.9467	-24.2975	0.067108	7892.26
SPGR	01/01/2022 01:00	1	1	Wet	2022-01-01	2	01:00:00	01:00:00	27.9473	-24.2894	0.047034	8335.83
SPGR	02/01/2022 01:00	2	1	Wet	2022-01-02	2	01:00:00	01:00:00	28.0008	-24.2797	0.524349	8225.17
SPGR	03/01/2022 01:00	3	1	Wet	2022-01-03	2	01:00:00	01:00:00	28.0156	-24.2743	0.321159	8631.02
SPGR	04/01/2022 01:00	4	1	Wet	2022-01-04	2	01:00:00	01:00:00	28.0062	-24.2795	0.056053	9322.47
SPGR	05/01/2022 01:00	5	1	Wet	2022-01-05	2	01:00:00	01:00:00	28.0165	-24.2776	0.289844	6325.35
SPGR	06/01/2022 01:00	6	1	Wet	2022-01-06	2	01:00:00	01:00:00	28.0147	-24.2741	0.005211	7770.5
SPGR	07/01/2022 01:00	7	1	Wet	2022-01-07	2	01:00:00	01:00:00	28.0104	-24.2742	0.08469	7510.34
SPGR	08/01/2022 01:00	8	1	Wet	2022-01-08	2	01:00:00	01:00:00	28.0102	-24.2798	0.377437	5308.59
SPGR	09/01/2022 01:00	9	1	Wet	2022-01-09	2	01:00:00	01:00:00	27.9893	-24.2747	0.041193	9261.07
SPGR	10/01/2022 01:00	10	1	Wet	2022-01-10	2	01:00:00	01:00:00	28.017	-24.2897	0.003905	8348.07
SPGR	11/01/2022 01:00	11	1	Wet	2022-01-11	2	01:00:00	01:00:00	28.007	-24.2781	0.013548	6939.78
SPGR	12/01/2022 01:00	12	1	Wet	2022-01-12	2	01:00:00	01:00:00	28.001	-24.2898	0.023524	5912.57
SPGR	13/01/2022 01:00	13	1	Wet	2022-01-13	2	01:00:00	01:00:00	28.0071	-24.2782	0.006887	6707.94
SPGR	14/01/2022 01:00	14	1	Wet	2022-01-14	2	01:00:00	01:00:00	28.0161	-24.2789	0.006084	5566.49
SPGR	15/01/2022 01:00	15	1	Wet	2022-01-15	2	01:00:00	01:00:00	28.0082	-24.2766	0.095234	6371.84
SPGR	16/01/2022 01:00	16	1	Wet	2022-01-16	2	01:00:00	01:00:00	27.9601	-24.29	0.19977	7446.3
SPGR	17/01/2022 01:00	17	1	Wet	2022-01-17	2	01:00:00	01:00:00	27.987	-24.2662	0.15467	9388.72
SPGR	18/01/2022 01:00	18	1	Wet	2022-01-18	2	01:00:00	01:00:00	27.9515	-24.2897	0.258025	5572.5
SPGR	19/01/2022 01:00	19	1	Wet	2022-01-19	2	01:00:00	01:00:00	27.9551	-24.2971	0.009293	10626.5
SPGR	20/01/2022 01:00	20	1	Wet	2022-01-20	2	01:00:00	01:00:00	28.0166	-24.2745	0.06905	9745.01
SPGR	21/01/2022 01:00	21	1	Wet	2022-01-21	2	01:00:00	01:00:00	28.029	-24.2799	0.093496	6582.99
SPGR	22/01/2022 01:00	22	1	Wet	2022-01-22	2	01:00:00	01:00:00	28.0073	-24.2776	0.011107	6848.55
SPGR	23/01/2022 01:00	23	1	Wet	2022-01-23	2	01:00:00	01:00:00	28.0093	-24.2778	0.374317	9587.97
SPGR	24/01/2022 01:00	24	1	Wet	2022-01-24	2	01:00:00	01:00:00	27.9492	-24.2967	0.104618	9109.04
SPGR	25/01/2022 01:00	25	1	Wet	2022-01-25	2	01:00:00	01:00:00	27.9338	-24.33	0.123085	10031.8
SPGR	26/01/2022 01:00	26	1	Wet	2022-01-26	2	01:00:00	01:00:00	27.9986	-24.3233	0.019161	11635.8
SPGR	27/01/2022 01:00	27	1	Wet	2022-01-27	2	01:00:00	01:00:00	28.0231	-24.2862	1.04917	9446.26
SPGR	28/01/2022 01:00	28	1	Wet	2022-01-28	2	01:00:00	01:00:00	27.959	-24.3059	0.002319	5120.46
SPGR	29/01/2022 01:00	29	1	Wet	2022-01-29	2	01:00:00	01:00:00	27.9456	-24.305	0.007534	2934.77
SPGR	30/01/2022 01:00	30	1	Wet	2022-01-30	2	01:00:00	01:00:00	27.9371	-24.2983	0.057882	4130.33
SPGR	31/01/2022 01:00	31	1	Wet	2022-01-31	2	01:00:00	01:00:00	27.9376	-24.2952	0	10045.8
SPGR	01/02/2022 01:00	1	2	Wet	2022-02-01	2	01:00:00	01:00:00	27.9987	-24.2707	0.011391	9077.12
SPGR	02/02/2022 01:00	2	2	Wet	2022-02-02	2	01:00:00	01:00:00	28.0098	-24.2796	0.343203	8332.85
SPGR	03/02/2022 01:00	3	2	Wet	2022-02-03	2	01:00:00	01:00:00	27.967	-24.2884	0.107788	6644.4
SPGR	04/02/2022 01:00	4	2	Wet	2022-02-04	2	01:00:00	01:00:00	27.9659	-24.28	0.0065	6914.7
SPGR	05/02/2022 01:00	5	2	Wet	2022-02-05	2	01:00:00	01:00:00	27.9513	-24.2846	0.214357	5756.81
SPGR	06/02/2022 01:00	6	2	Wet	2022-02-06	2	01:00:00	01:00:00	27.9411	-24.2964	0.10147	4969.06
SPGR	07/02/2022 01:00	7	2	Wet	2022-02-07	2	01:00:00	01:00:00	27.9373	-24.2948	0.058989	7571.61
SPGR	08/02/2022 01:00	8	2	Wet	2022-02-08	2	01:00:00	01:00:00	27.985	-24.287	0.038688	6561.68
SPGR	09/02/2022 01:00	9	2	Wet	2022-02-09	2	01:00:00	01:00:00	27.9737	-24.3181	0.36231	7905.36
SPGR	10/02/2022 01:00	10	2	Wet	2022-02-10	2	01:00:00	01:00:00	27.9518	-24.2963	0.420306	11378.7
SPGR	11/02/2022 01:00	11	2	Wet	2022-02-11	2	01:00:00	01:00:00	28.0164	-24.2736	0.047206	7669.03
SPGR	12/02/2022 01:00	12	2	Wet	2022-02-12	2	01:00:00	01:00:00	27.9782	-24.3045	0.006338	5800.48
SPGR	13/02/2022 01:00	13	2	Wet	2022-02-13	2	01:00:00	01:00:00	27.9638	-24.3277	0.180787	6503.52
SPGR	14/02/2022 01:00	14	2	Wet	2022-02-14	2	01:00:00	01:00:00	27.9353	-24.3098	0.252984	6937.53
SPGR	15/02/2022 01:00	15	2	Wet	2022-02-15	2	01:00:00	01:00:00	27.9544	-24.291	0.025001	9757.86
SPGR	16/02/2022 01:00	16	2	Wet	2022-02-16	2	01:00:00	01:00:00	27.9781	-24.337	0.090533	7983.16
SPGR	17/02/2022 01:00	17	2	Wet	2022-02-17	2	01:00:00	01:00:00	27.926	-24.3455	0.003905	6254.17
SPGR	18/02/2022 01:00	18	2	Wet	2022-02-18	2	01:00:00	01:00:00	27.9341	-24.3327	0	6027.6
SPGR	19/02/2022 01:00	19	2	Wet	2022-02-19	2	01:00:00	01:00:00	27.9689	-24.34	0.091653	8712.97
SPGR	20/02/2022 01:00	20	2	Wet	2022-02-20	2	01:00:00	01:00:00	27.9504	-24.3281	0.169582	5833.67
SPGR	21/02/2022 01:00	21	2	Wet	2022-02-21	2	01:00:00	01:00:00	27.9378	-24.3309	0.016075	10107.6
SPGR	22/02/2022 01:00	22	2	Wet	2022-02-22	2	01:00:00	01:00:00	27.9364	-24.3541	0.271298	6275.66
SPGR	23/02/2022 01:00	23	2	Wet	2022-02-23	2	01:00:00	01:00:00	27.9215	-24.3426	0.057095	4864.71
SPGR	24/02/2022 01:00	24	2	Wet	2022-02-24	2	01:00:00	01:00:00	27.9266	-24.3526	0.003013	3559.4
SPGR	25/02/2022 01:00	25	2	Wet	2022-02-25	2	01:00:00	01:00:00	27.9267	-24.3498	0.134415	5215.85
SPGR	01/09/2016 00:09	1	9	Spring	2016-09-01	1	00:09:00	00:00:00	27.9626	-24.3197	0.003776	4297.17
SPGR	02/09/2016 00:07	2	9	Spring	2016-09-02	1	00:07:00	00:00:00	27.95	-24.31	0.040657	4987.42
SPGR	03/09/2016 00:12	3	9	Spring	2016-09-03	1	00:12:00	00:00:00	27.9554	-24.3401	0.014384	3468.45
SPGR	04/09/2016 00:09	4	9	Spring	2016-09-04	1	00:09:00	00:00:00	27.9585	-24.3213	0.002083	4823.29
SPGR	05/09/2016 00:02	5	9	Spring	2016-09-05	1	00:02:00	00:00:00	27.9704	-24.3394	0.151289	5974.62
SPGR	06/09/2016 00:09	6	9	Spring	2016-09-06	1	00:09:00	00:00:00	27.9854	-24.3239	0.493964	7724.17
SPGR	07/09/2016 00:11	7	9	Spring	2016-09-07	1	00:11:00	00:00:00	28.0106	-24.32	0.006337	7110.53
SPGR	08/09/2016 00:12	8	9	Spring	2016-09-08	1	00:12:00	00:00:00	27.9949	-24.3372	0.196128	6652.95
SPGR	09/09/2016 00:07	9	9	Spring	2016-09-09	1	00:07:00	00:00:00	27.9713	-24.3542	0.143352	4057.51
SPGR	10/09/2016 00:07	10	9	Spring	2016-09-10	1	00:07:00	00:00:00	27.9684	-24.3372	0.067932	6068.16
SPGR	11/09/2016 00:03	11	9	Spring	2016-09-11	1	00:03:00	00:00:00	27.9444	-24.3144	0.103692	6396.99
SPGR	12/09/2016 00:04	12	9	Spring	2016-09-12	1	00:04:00	00:00:00	27.9453	-24.3262	0.184387	7207.09
SPGR	13/09/2016 00:02	13	9	Spring	2016-09-13	1	00:02:00	00:00:00	27.9495	-24.3215	0.261885	7509.82
SPGR	14/09/2016 00:13	14	9	Spring	2016-09-14	1	00:13:00	00:00:00	27.934	-24.3224	1.15182	5617.53
SPGR	15/09/2016 00:12	15	9	Spring	2016-09-15	1	00:12:00	00:00:00	27.9505	-24.3397	0.089705	3575
SPGR	16/09/2016 00:11	16	9	Spring	2016-09-16	1	00:11:00	00:00:00	27.9707	-24.3396	0.171529	5541.41
SPGR	17/09/2016 00:12	17	9	Spring	2016-09-17	1	00:12:00	00:00:00	27.9562	-24.3413	0.15253	5340.88
SPGR	18/09/2016 00:06	18	9	Spring	2016-09-18	1	00:06:00	00:00:00	27.9636	-24.3293	0.019236	5758.37
SPGR	19/09/2016 00:09	19	9	Spring	2016-09-19	1	00:09:00	00:00:00	27.9442	-24.3374	0.003817	6719.4
SPGR	20/09/2016 00:15	20	9	Spring	2016-09-20	1	00:15:00	00:00:00	27.9508	-24.3192	0.18508	7086.9
SPGR	21/09/2016 00:02	21	9	Spring	2016-09-21	1	00:02:00	00:00:00	27.9591	-24.3301	0.102603	4300.45
SPGR	22/09/2016 00:11	22	9	Spring	2016-09-22	1	00:11:00	00:00:00	27.9519	-24.3444	0.167981	7116.85
SPGR	23/09/2016 00:14	23	9	Spring	2016-09-23	1	00:14:00	00:00:00	27.9702	-24.3325	1.66693	10024.5
SPGR	24/09/2016 00:06	24	9	Spring	2016-09-24	1	00:06:00	00:00:00	27.9611	-24.3392	0.015524	4877.17
SPGR	25/09/2016 00:41	25	9	Spring	2016-09-25	1	00:41:00	01:00:00	27.9562	-24.3414	0.006785	4148.78
SPGR	26/09/2016 00:05	26	9	Spring	2016-09-26	1	00:05:00	00:00:00	27.966	-24.3439	0.014112	7147.79
SPGR	27/09/2016 00:12	27	9	Spring	2016-09-27	1	00:12:00	00:00:00	27.9508	-24.3507	0.005831	4795.29
SPGR	28/09/2016 00:08	28	9	Spring	2016-09-28	1	00:08:00	00:00:00	27.948	-24.3384	0.104062	4034.69
SPGR	29/09/2016 00:03	29	9	Spring	2016-09-29	1	00:03:00	00:00:00	27.9551	-24.3347	0.021637	4362.03
SPGR	30/09/2016 00:12	30	9	Spring	2016-09-30	1	00:12:00	00:00:00	27.9482	-24.3366	0.032798	4457.46
SPGR	01/10/2016 00:11	1	10	Spring	2016-10-01	1	00:11:00	00:00:00	27.9741	-24.3397	0.043802	3942.71
SPGR	02/10/2016 00:09	2	10	Spring	2016-10-02	1	00:09:00	00:00:00	27.978	-24.3442	0.129456	6301.45
SPGR	03/10/2016 00:13	3	10	Spring	2016-10-03	1	00:13:00	00:00:00	27.9481	-24.3366	0.018454	7077.25
SPGR	04/10/2016 00:09	4	10	Spring	2016-10-04	1	00:09:00	00:00:00	27.9715	-24.3443	0.071434	9222.16
SPGR	05/10/2016 00:13	5	10	Spring	2016-10-05	1	00:13:00	00:00:00	27.9456	-24.321	0.027216	5071.14
SPGR	06/10/2016 00:03	6	10	Spring	2016-10-06	1	00:03:00	00:00:00	27.9657	-24.3363	0.019719	9237.66
SPGR	07/10/2016 08:54	7	10	Spring	2016-10-07	1	08:54:00	09:00:00	27.9635	-24.3125	6.09314	9275.5
SPGR	08/10/2016 00:12	8	10	Spring	2016-10-08	1	00:12:00	00:00:00	27.9561	-24.3456	0.018943	8216.46
SPGR	09/10/2016 00:09	9	10	Spring	2016-10-09	1	00:09:00	00:00:00	27.9761	-24.3547	0.003171	6213.08
SPGR	10/10/2016 00:09	10	10	Spring	2016-10-10	1	00:09:00	00:00:00	27.9558	-24.3466	0.167425	4795.51
SPGR	11/10/2016 00:12	11	10	Spring	2016-10-11	1	00:12:00	00:00:00	27.9503	-24.3493	0.096384	4889.64
SPGR	12/10/2016 00:05	12	10	Spring	2016-10-12	1	00:05:00	00:00:00	27.9441	-24.3498	0.107504	8333.05
SPGR	13/10/2016 00:14	13	10	Spring	2016-10-13	1	00:14:00	00:00:00	27.9581	-24.3468	0.088097	3408.99
SPGR	14/10/2016 00:03	14	10	Spring	2016-10-14	1	00:03:00	00:00:00	27.95	-24.3482	0.022871	3611.55
SPGR	15/10/2016 00:07	15	10	Spring	2016-10-15	1	00:07:00	00:00:00	27.9575	-24.349	0.128792	3883.79
SPGR	16/10/2016 00:15	16	10	Spring	2016-10-16	1	00:15:00	00:00:00	27.9477	-24.3426	0.002563	7525.54
SPGR	17/10/2016 00:02	17	10	Spring	2016-10-17	1	00:02:00	00:00:00	27.9949	-24.3372	0.017455	9603.67
SPGR	18/10/2016 00:03	18	10	Spring	2016-10-18	1	00:03:00	00:00:00	27.9947	-24.3402	0.088832	9775.08
SPGR	19/10/2016 00:13	19	10	Spring	2016-10-19	1	00:13:00	00:00:00	27.9963	-24.3324	0.162543	7144.58
SPGR	20/10/2016 00:11	20	10	Spring	2016-10-20	1	00:11:00	00:00:00	27.9827	-24.3208	0.005552	8279.76
SPGR	21/10/2016 00:09	21	10	Spring	2016-10-21	1	00:09:00	00:00:00	27.9717	-24.3086	0.221894	5466.22
SPGR	22/10/2016 00:04	22	10	Spring	2016-10-22	1	00:04:00	00:00:00	27.9783	-24.2947	0.120294	6175.33
SPGR	23/10/2016 00:08	23	10	Spring	2016-10-23	1	00:08:00	00:00:00	27.9941	-24.2811	1.34899	10924
SPGR	24/10/2016 00:04	24	10	Spring	2016-10-24	1	00:04:00	00:00:00	28.0182	-24.2904	0.021264	10546
SPGR	25/10/2016 00:13	25	10	Spring	2016-10-25	1	00:13:00	00:00:00	28.0146	-24.2881	1.44513	7735.48
SPGR	26/10/2016 00:11	26	10	Spring	2016-10-26	1	00:11:00	00:00:00	28.011	-24.3049	0.021381	6506.16
SPGR	27/10/2016 00:06	27	10	Spring	2016-10-27	1	00:06:00	00:00:00	28.0253	-24.2794	0.030963	7132.24
SPGR	28/10/2016 00:11	28	10	Spring	2016-10-28	1	00:11:00	00:00:00	28.021	-24.298	0	5650.54
SPGR	29/10/2016 00:08	29	10	Spring	2016-10-29	1	00:08:00	00:00:00	28.0258	-24.277	0.115753	6895.62
SPGR	30/10/2016 00:09	30	10	Spring	2016-10-30	1	00:09:00	00:00:00	28.0324	-24.2785	0.022217	9568.37
SPGR	31/10/2016 00:11	31	10	Spring	2016-10-31	1	00:11:00	00:00:00	28.0324	-24.2785	0.01407	7732.16
SPGR	01/03/2017 01:00	1	3	Fall	2017-03-01	1	01:00:00	01:00:00	27.9804	-24.2687	0.004887	5100.26
SPGR	02/03/2017 01:00	2	3	Fall	2017-03-02	1	01:00:00	01:00:00	27.9455	-24.2875	0.003777	3455.52
SPGR	03/03/2017 01:00	3	3	Fall	2017-03-03	1	01:00:00	01:00:00	27.9416	-24.3013	0.170028	4776
SPGR	04/03/2017 01:00	4	3	Fall	2017-03-04	1	01:00:00	01:00:00	27.9416	-24.3	0.01333	6340.43
SPGR	05/03/2017 01:00	5	3	Fall	2017-03-05	1	01:00:00	01:00:00	27.9408	-24.2874	0.036836	5747.29
SPGR	06/03/2017 01:00	6	3	Fall	2017-03-06	1	01:00:00	01:00:00	27.9455	-24.3015	0.163059	5180.09
SPGR	07/03/2017 01:00	7	3	Fall	2017-03-07	1	01:00:00	01:00:00	27.9449	-24.2874	0.00452	6734.65
SPGR	08/03/2017 01:00	8	3	Fall	2017-03-08	1	01:00:00	01:00:00	27.9745	-24.2767	0.285715	5424.52
SPGR	09/03/2017 01:00	9	3	Fall	2017-03-09	1	01:00:00	01:00:00	27.9786	-24.3037	0.117403	7930.46
SPGR	10/03/2017 01:00	10	3	Fall	2017-03-10	1	01:00:00	01:00:00	27.9397	-24.2893	0.147658	5746.08
SPGR	11/03/2017 01:00	11	3	Fall	2017-03-11	1	01:00:00	01:00:00	27.9402	-24.3098	0.007776	6680.93
SPGR	12/03/2017 01:00	12	3	Fall	2017-03-12	1	01:00:00	01:00:00	27.9366	-24.3065	0.003054	4177.4
SPGR	13/03/2017 01:00	13	3	Fall	2017-03-13	1	01:00:00	01:00:00	27.9334	-24.3062	0.062357	8570.84
SPGR	14/03/2017 01:00	14	3	Fall	2017-03-14	1	01:00:00	01:00:00	27.9391	-24.2967	0.127503	3425.92
SPGR	15/03/2017 01:00	15	3	Fall	2017-03-15	1	01:00:00	01:00:00	27.9343	-24.3069	0.220379	7319.75
SPGR	16/03/2017 01:00	16	3	Fall	2017-03-16	1	01:00:00	01:00:00	27.9401	-24.2994	0.027875	12315.4
SPGR	17/03/2017 01:00	17	3	Fall	2017-03-17	1	01:00:00	01:00:00	27.9742	-24.2726	0	6095.41
SPGR	18/03/2017 01:00	18	3	Fall	2017-03-18	1	01:00:00	01:00:00	27.9971	-24.2906	0.357768	5658.48
SPGR	19/03/2017 01:00	19	3	Fall	2017-03-19	1	01:00:00	01:00:00	27.9647	-24.2773	0.224044	5281.4
SPGR	20/03/2017 01:00	20	3	Fall	2017-03-20	1	01:00:00	01:00:00	27.9368	-24.3014	0.09733	3820.6
SPGR	21/03/2017 01:00	21	3	Fall	2017-03-21	1	01:00:00	01:00:00	27.9334	-24.3054	0.016249	6566.74
SPGR	22/03/2017 01:00	22	3	Fall	2017-03-22	1	01:00:00	01:00:00	27.9479	-24.3217	0.306851	5193.74
SPGR	23/03/2017 01:00	23	3	Fall	2017-03-23	1	01:00:00	01:00:00	27.9669	-24.312	0.043906	4173.33
SPGR	24/03/2017 01:00	24	3	Fall	2017-03-24	1	01:00:00	01:00:00	27.9708	-24.3088	0.002036	4160.41
SPGR	25/03/2017 01:00	25	3	Fall	2017-03-25	1	01:00:00	01:00:00	27.9566	-24.2893	0.002319	5141.2
SPGR	26/03/2017 02:00	26	3	Fall	2017-03-26	1	02:00:00	02:00:00	27.9767	-24.2716	0.102847	5450.4
SPGR	27/03/2017 01:00	27	3	Fall	2017-03-27	1	01:00:00	01:00:00	27.9619	-24.2971	0.040918	5589.94
SPGR	28/03/2017 01:00	28	3	Fall	2017-03-28	1	01:00:00	01:00:00	27.9461	-24.3175	0.003249	4461.24
SPGR	29/03/2017 01:00	29	3	Fall	2017-03-29	1	01:00:00	01:00:00	27.9557	-24.3172	0.114085	4563.44
SPGR	30/03/2017 02:00	30	3	Fall	2017-03-30	1	02:00:00	02:00:00	27.9506	-24.3205	0.002036	5586.93
SPGR	31/03/2017 01:00	31	3	Fall	2017-03-31	1	01:00:00	01:00:00	27.9429	-24.3163	0.093149	4584.27
SPGR	01/04/2017 01:00	1	4	Fall	2017-04-01	1	01:00:00	01:00:00	27.9502	-24.3175	0.05888	5626.56
SPGR	02/04/2017 01:00	2	4	Fall	2017-04-02	1	01:00:00	01:00:00	27.9687	-24.3234	0.255145	4358.7
SPGR	03/04/2017 01:00	3	4	Fall	2017-04-03	1	01:00:00	01:00:00	27.9544	-24.3032	0.080916	5316.1
SPGR	04/04/2017 01:00	4	4	Fall	2017-04-04	1	01:00:00	01:00:00	27.95	-24.3193	0.171025	5653.15
SPGR	05/04/2017 01:00	5	4	Fall	2017-04-05	1	01:00:00	01:00:00	27.9622	-24.3385	0.003484	5778.62
SPGR	06/04/2017 01:00	6	4	Fall	2017-04-06	1	01:00:00	01:00:00	27.9568	-24.34	0.002222	5348.07
SPGR	07/04/2017 02:00	7	4	Fall	2017-04-07	1	02:00:00	02:00:00	27.9812	-24.3359	0.477309	7459.02
SPGR	08/04/2017 01:00	8	4	Fall	2017-04-08	1	01:00:00	01:00:00	27.9913	-24.3192	0.009856	4239.72
SPGR	09/04/2017 01:00	9	4	Fall	2017-04-09	1	01:00:00	01:00:00	27.9784	-24.3045	0.025613	5400.27
SPGR	10/04/2017 01:00	10	4	Fall	2017-04-10	1	01:00:00	01:00:00	27.9996	-24.2974	0.387977	4872.01
SPGR	11/04/2017 01:00	11	4	Fall	2017-04-11	1	01:00:00	01:00:00	28.0074	-24.2877	0.459497	7473.59
SPGR	12/04/2017 01:00	12	4	Fall	2017-04-12	1	01:00:00	01:00:00	27.9864	-24.2903	0.008037	6558.35
SPGR	13/04/2017 01:00	13	4	Fall	2017-04-13	1	01:00:00	01:00:00	28.0169	-24.2787	0.111534	6586.49
SPGR	14/04/2017 01:00	14	4	Fall	2017-04-14	1	01:00:00	01:00:00	28.0096	-24.2854	0.159586	5414.27
SPGR	15/04/2017 01:00	15	4	Fall	2017-04-15	1	01:00:00	01:00:00	28.0061	-24.2914	0.159648	7122.62
SPGR	16/04/2017 01:00	16	4	Fall	2017-04-16	1	01:00:00	01:00:00	27.9969	-24.2905	0.051203	3478.17
SPGR	17/04/2017 01:00	17	4	Fall	2017-04-17	1	01:00:00	01:00:00	28.0203	-24.2889	0.20478	9761.18
SPGR	18/04/2017 01:00	18	4	Fall	2017-04-18	1	01:00:00	01:00:00	27.9984	-24.2861	0.084422	6892.11
SPGR	19/04/2017 01:00	19	4	Fall	2017-04-19	1	01:00:00	01:00:00	28.0036	-24.2718	0.513955	11413.7
SPGR	20/04/2017 01:00	20	4	Fall	2017-04-20	1	01:00:00	01:00:00	28.0101	-24.2731	0.020368	10757.5
SPGR	21/04/2017 01:00	21	4	Fall	2017-04-21	1	01:00:00	01:00:00	27.9766	-24.2913	0.263601	8047.19
SPGR	22/04/2017 01:00	22	4	Fall	2017-04-22	1	01:00:00	01:00:00	28.0031	-24.2718	0.249381	7090.61
SPGR	23/04/2017 01:00	23	4	Fall	2017-04-23	1	01:00:00	01:00:00	28.0062	-24.2744	0.008037	8903.4
SPGR	24/04/2017 01:00	24	4	Fall	2017-04-24	1	01:00:00	01:00:00	28.0023	-24.2736	0.009859	8196.29
SPGR	25/04/2017 01:00	25	4	Fall	2017-04-25	1	01:00:00	01:00:00	27.9948	-24.2805	0	6191.03
SPGR	26/04/2017 01:00	26	4	Fall	2017-04-26	1	01:00:00	01:00:00	27.99	-24.2804	0.489828	9304.3
SPGR	27/04/2017 01:00	27	4	Fall	2017-04-27	1	01:00:00	01:00:00	27.9902	-24.3	0.233517	16524
SPGR	28/04/2017 01:00	28	4	Fall	2017-04-28	1	01:00:00	01:00:00	27.9503	-24.3329	0.977276	7246.81
SPGR	29/04/2017 01:00	29	4	Fall	2017-04-29	1	01:00:00	01:00:00	27.9792	-24.3165	0.003905	7973.67
SPGR	30/04/2017 01:00	30	4	Fall	2017-04-30	1	01:00:00	01:00:00	28.0269	-24.2814	0.360268	5494.51
SPGR	01/03/2021 01:00	1	3	Fall	2021-03-01	2	01:00:00	01:00:00	27.9291	-24.3102	0.003841	4591.76
SPGR	02/03/2021 01:00	2	3	Fall	2021-03-02	2	01:00:00	01:00:00	27.9371	-24.2904	0.010548	4283.21
SPGR	03/03/2021 01:00	3	3	Fall	2021-03-03	2	01:00:00	01:00:00	27.9396	-24.308	0.283262	6029.46
SPGR	04/03/2021 01:00	4	3	Fall	2021-03-04	2	01:00:00	01:00:00	27.9561	-24.2836	0.005915	7829.16
SPGR	05/03/2021 01:00	5	3	Fall	2021-03-05	2	01:00:00	01:00:00	27.9971	-24.2744	0.006757	9268.88
SPGR	06/03/2021 01:00	6	3	Fall	2021-03-06	2	01:00:00	01:00:00	27.9498	-24.2929	0.01025	9283.16
SPGR	07/03/2021 01:00	7	3	Fall	2021-03-07	2	01:00:00	01:00:00	28.0143	-24.2794	0.034433	8183.95
SPGR	08/03/2021 01:00	8	3	Fall	2021-03-08	2	01:00:00	01:00:00	27.947	-24.2929	0.081478	10327.6
SPGR	09/03/2021 01:00	9	3	Fall	2021-03-09	2	01:00:00	01:00:00	28.0063	-24.279	0.01535	6561.69
SPGR	10/03/2021 01:00	10	3	Fall	2021-03-10	2	01:00:00	01:00:00	27.9834	-24.3106	0.239162	10213.6
SPGR	11/03/2021 01:00	11	3	Fall	2021-03-11	2	01:00:00	01:00:00	27.9414	-24.3062	0.074998	6393.77
SPGR	12/03/2021 01:00	12	3	Fall	2021-03-12	2	01:00:00	01:00:00	27.9393	-24.3282	0.006957	7099.08
SPGR	13/03/2021 01:00	13	3	Fall	2021-03-13	2	01:00:00	01:00:00	27.9586	-24.3469	0.005552	7215.76
SPGR	14/03/2021 01:00	14	3	Fall	2021-03-14	2	01:00:00	01:00:00	27.9498	-24.3235	0.098437	10088.6
SPGR	15/03/2021 01:00	15	3	Fall	2021-03-15	2	01:00:00	01:00:00	27.9874	-24.2667	0.010422	8252.3
SPGR	16/03/2021 01:00	16	3	Fall	2021-03-16	2	01:00:00	01:00:00	28.0203	-24.2904	0.424593	9045.79
SPGR	17/03/2021 01:00	17	3	Fall	2021-03-17	2	01:00:00	01:00:00	28.003	-24.3101	0.04741	11113.8
SPGR	18/03/2021 01:00	18	3	Fall	2021-03-18	2	01:00:00	01:00:00	27.9261	-24.3521	0.002035	6996.61
SPGR	19/03/2021 01:00	19	3	Fall	2021-03-19	2	01:00:00	01:00:00	27.9537	-24.3429	0.261359	6263.06
SPGR	20/03/2021 01:00	20	3	Fall	2021-03-20	2	01:00:00	01:00:00	27.94	-24.3123	0.010241	10761.8
SPGR	21/03/2021 01:00	21	3	Fall	2021-03-21	2	01:00:00	01:00:00	27.9939	-24.2803	0.396285	7831.05
SPGR	22/03/2021 01:00	22	3	Fall	2021-03-22	2	01:00:00	01:00:00	28.0208	-24.2741	0.129457	5675.59
SPGR	23/03/2021 01:00	23	3	Fall	2021-03-23	2	01:00:00	01:00:00	27.9807	-24.2974	0.006887	5054.39
SPGR	24/03/2021 01:00	24	3	Fall	2021-03-24	2	01:00:00	01:00:00	27.9723	-24.3248	0.003776	5304.21
SPGR	25/03/2021 01:00	25	3	Fall	2021-03-25	2	01:00:00	01:00:00	27.9777	-24.3305	0.270382	12577.3
SPGR	26/03/2021 01:00	26	3	Fall	2021-03-26	2	01:00:00	01:00:00	27.9411	-24.3068	0.002222	9793.23
SPGR	27/03/2021 01:00	27	3	Fall	2021-03-27	2	01:00:00	01:00:00	28.0049	-24.2739	0.094004	7160.26
SPGR	28/03/2021 02:00	28	3	Fall	2021-03-28	2	02:00:00	02:00:00	28.017	-24.2897	0.151291	8381.36
SPGR	29/03/2021 01:00	29	3	Fall	2021-03-29	2	01:00:00	01:00:00	27.9853	-24.3104	0.151325	7349.67
SPGR	30/03/2021 01:00	30	3	Fall	2021-03-30	2	01:00:00	01:00:00	27.9566	-24.3492	0.129047	6345.74
SPGR	31/03/2021 01:00	31	3	Fall	2021-03-31	2	01:00:00	01:00:00	27.9211	-24.346	0.054838	8792.17
SPGR	01/04/2021 01:00	1	4	Fall	2021-04-01	2	01:00:00	01:00:00	27.9508	-24.328	0.181874	16527.4
SPGR	02/04/2021 01:00	2	4	Fall	2021-04-02	2	01:00:00	01:00:00	27.9338	-24.3474	0.100545	8261
SPGR	03/04/2021 01:00	3	4	Fall	2021-04-03	2	01:00:00	01:00:00	27.9706	-24.3532	0.003013	7441.2
SPGR	04/04/2021 01:00	4	4	Fall	2021-04-04	2	01:00:00	01:00:00	27.9243	-24.3513	0.067906	3510.55
SPGR	05/04/2021 01:00	5	4	Fall	2021-04-05	2	01:00:00	01:00:00	27.9187	-24.3438	0.001111	4708.11
SPGR	06/04/2021 01:00	6	4	Fall	2021-04-06	2	01:00:00	01:00:00	27.9256	-24.3514	0.235092	6613.45
SPGR	07/04/2021 01:00	7	4	Fall	2021-04-07	2	01:00:00	01:00:00	27.931	-24.3064	0.170933	10816
SPGR	08/04/2021 01:00	8	4	Fall	2021-04-08	2	01:00:00	01:00:00	27.9978	-24.2696	0.004639	7017.8
SPGR	09/04/2021 01:00	9	4	Fall	2021-04-09	2	01:00:00	01:00:00	28.0067	-24.2791	0	6213.51
SPGR	10/04/2021 01:00	10	4	Fall	2021-04-10	2	01:00:00	01:00:00	28.0246	-24.2997	0.049665	7579.79
SPGR	11/04/2021 01:00	11	4	Fall	2021-04-11	2	01:00:00	01:00:00	28.0064	-24.2809	0.049184	7351.76
SPGR	12/04/2021 01:00	12	4	Fall	2021-04-12	2	01:00:00	01:00:00	27.9988	-24.2807	0.003054	6576.44
SPGR	13/04/2021 01:00	13	4	Fall	2021-04-13	2	01:00:00	01:00:00	28.0156	-24.2948	0.007212	6601.09
SPGR	14/04/2021 01:00	14	4	Fall	2021-04-14	2	01:00:00	01:00:00	28.0048	-24.2883	0.006338	7756.75
SPGR	15/04/2021 01:00	15	4	Fall	2021-04-15	2	01:00:00	01:00:00	27.9958	-24.2906	0.247477	8920.34
SPGR	16/04/2021 01:00	16	4	Fall	2021-04-16	2	01:00:00	01:00:00	28.0248	-24.3021	0.0356	5506.45
SPGR	17/04/2021 01:00	17	4	Fall	2021-04-17	2	01:00:00	01:00:00	28.0109	-24.2734	0.015583	5281.9
SPGR	18/04/2021 01:00	18	4	Fall	2021-04-18	2	01:00:00	01:00:00	28.0136	-24.3003	0.255189	7478.62
SPGR	19/04/2021 01:00	19	4	Fall	2021-04-19	2	01:00:00	01:00:00	28.0053	-24.2783	0.009774	6501.22
SPGR	20/04/2021 01:00	20	4	Fall	2021-04-20	2	01:00:00	01:00:00	27.9513	-24.292	0.006887	9142.03
SPGR	21/04/2021 01:00	21	4	Fall	2021-04-21	2	01:00:00	01:00:00	28.0169	-24.2777	0.072374	6171.34
SPGR	22/04/2021 01:00	22	4	Fall	2021-04-22	2	01:00:00	01:00:00	28.0035	-24.313	0.004638	7433.3
SPGR	23/04/2021 01:00	23	4	Fall	2021-04-23	2	01:00:00	01:00:00	27.9865	-24.3364	0.044077	5428.31
SPGR	24/04/2021 01:00	24	4	Fall	2021-04-24	2	01:00:00	01:00:00	27.9661	-24.3221	0.118231	7200.92
SPGR	25/04/2021 01:00	25	4	Fall	2021-04-25	2	01:00:00	01:00:00	27.9412	-24.3402	0.075045	7113.3
SPGR	26/04/2021 01:00	26	4	Fall	2021-04-26	2	01:00:00	01:00:00	27.9448	-24.2939	0.022541	10105.1
SPGR	27/04/2021 01:00	27	4	Fall	2021-04-27	2	01:00:00	01:00:00	28.0171	-24.2769	0.19603	5548.84
SPGR	28/04/2021 01:00	28	4	Fall	2021-04-28	2	01:00:00	01:00:00	28.0277	-24.2848	0.002036	6582
SPGR	29/04/2021 01:00	29	4	Fall	2021-04-29	2	01:00:00	01:00:00	28.0254	-24.3007	0.061741	5748.46
SPGR	30/04/2021 01:00	30	4	Fall	2021-04-30	2	01:00:00	01:00:00	28.0216	-24.2894	0.214348	6195.4
SPGR	01/09/2021 01:00	1	9	Spring	2021-09-01	2	01:00:00	01:00:00	27.9984	-24.2772	0.051705	8236.21
SPGR	02/09/2021 01:00	2	9	Spring	2021-09-02	2	01:00:00	01:00:00	27.9513	-24.2887	0.270616	8017
SPGR	03/09/2021 01:00	3	9	Spring	2021-09-03	2	01:00:00	01:00:00	28.0003	-24.2896	0.267581	7158.84
SPGR	04/09/2021 01:00	4	9	Spring	2021-09-04	2	01:00:00	01:00:00	27.9982	-24.3132	0.265479	9311.65
SPGR	05/09/2021 01:00	5	9	Spring	2021-09-05	2	01:00:00	01:00:00	27.9416	-24.3521	0.014265	6898.42
SPGR	06/09/2021 01:00	6	9	Spring	2021-09-06	2	01:00:00	01:00:00	27.9215	-24.3471	0.148034	8078.48
SPGR	07/09/2021 01:00	7	9	Spring	2021-09-07	2	01:00:00	01:00:00	27.9712	-24.3445	0.002035	6841.09
SPGR	08/09/2021 01:00	8	9	Spring	2021-09-08	2	01:00:00	01:00:00	27.9561	-24.3457	0.045862	5291.14
SPGR	09/09/2021 01:00	9	9	Spring	2021-09-09	2	01:00:00	01:00:00	27.9355	-24.3584	0.033745	6284.53
SPGR	10/09/2021 01:00	10	9	Spring	2021-09-10	2	01:00:00	01:00:00	27.9543	-24.3498	0.066717	7903.42
SPGR	11/09/2021 01:00	11	9	Spring	2021-09-11	2	01:00:00	01:00:00	27.9538	-24.3451	0.061072	5819.57
SPGR	12/09/2021 01:00	12	9	Spring	2021-09-12	2	01:00:00	01:00:00	27.939	-24.3496	0.386787	6540.27
SPGR	13/09/2021 01:00	13	9	Spring	2021-09-13	2	01:00:00	01:00:00	27.9395	-24.3353	0.351773	8418.11
SPGR	14/09/2021 01:00	14	9	Spring	2021-09-14	2	01:00:00	01:00:00	27.9849	-24.3354	0.161906	5472.6
SPGR	15/09/2021 01:00	15	9	Spring	2021-09-15	2	01:00:00	01:00:00	27.9717	-24.3518	0.064689	6806.22
SPGR	16/09/2021 01:00	16	9	Spring	2021-09-16	2	01:00:00	01:00:00	27.9637	-24.3291	0.04075	6906.84
SPGR	17/09/2021 01:00	17	9	Spring	2021-09-17	2	01:00:00	01:00:00	27.9853	-24.3166	0.018048	7004.61
SPGR	18/09/2021 01:00	18	9	Spring	2021-09-18	2	01:00:00	01:00:00	27.9542	-24.333	0.005646	5355.57
SPGR	19/09/2021 01:00	19	9	Spring	2021-09-19	2	01:00:00	01:00:00	27.9876	-24.3361	0.238182	6745.47
SPGR	20/09/2021 01:00	20	9	Spring	2021-09-20	2	01:00:00	01:00:00	27.9546	-24.3448	0.016571	5516.8
SPGR	21/09/2021 01:00	21	9	Spring	2021-09-21	2	01:00:00	01:00:00	27.9344	-24.3472	0.248035	8624.88
SPGR	22/09/2021 01:00	22	9	Spring	2021-09-22	2	01:00:00	01:00:00	27.951	-24.3197	0.078809	8917.07
SPGR	23/09/2021 01:00	23	9	Spring	2021-09-23	2	01:00:00	01:00:00	27.9463	-24.2963	0.003014	8596.26
SPGR	24/09/2021 01:00	24	9	Spring	2021-09-24	2	01:00:00	01:00:00	27.9818	-24.3188	0.165284	8706.41
SPGR	25/09/2021 01:00	25	9	Spring	2021-09-25	2	01:00:00	01:00:00	27.9923	-24.3511	0.109158	9377.48
SPGR	26/09/2021 01:00	26	9	Spring	2021-09-26	2	01:00:00	01:00:00	27.9341	-24.3175	0.064459	7494.62
SPGR	27/09/2021 01:00	27	9	Spring	2021-09-27	2	01:00:00	01:00:00	27.9454	-24.3053	0.24696	7964.87
SPGR	28/09/2021 01:00	28	9	Spring	2021-09-28	2	01:00:00	01:00:00	27.9549	-24.302	0.018273	8443.15
SPGR	29/09/2021 01:00	29	9	Spring	2021-09-29	2	01:00:00	01:00:00	27.9969	-24.2701	0.171453	9848.89
SPGR	30/09/2021 01:00	30	9	Spring	2021-09-30	2	01:00:00	01:00:00	28.0051	-24.2813	0.076589	8956.95
SPGR	01/10/2021 01:00	1	10	Spring	2021-10-01	2	01:00:00	01:00:00	27.9821	-24.3124	0.001018	7682.32
SPGR	02/10/2021 01:00	2	10	Spring	2021-10-02	2	01:00:00	01:00:00	27.9861	-24.3502	0.096485	5746.55
SPGR	03/10/2021 01:00	3	10	Spring	2021-10-03	2	01:00:00	01:00:00	27.9771	-24.3516	0.006106	7974.59
SPGR	04/10/2021 01:00	4	10	Spring	2021-10-04	2	01:00:00	01:00:00	27.9892	-24.3485	0.063834	7981.56
SPGR	05/10/2021 01:00	5	10	Spring	2021-10-05	2	01:00:00	01:00:00	27.946	-24.3217	0.709819	7597.63
SPGR	06/10/2021 01:00	6	10	Spring	2021-10-06	2	01:00:00	01:00:00	27.9714	-24.3286	0.005646	10461
SPGR	07/10/2021 01:00	7	10	Spring	2021-10-07	2	01:00:00	01:00:00	27.9682	-24.2796	0.003014	7419.09
SPGR	08/10/2021 01:00	8	10	Spring	2021-10-08	2	01:00:00	01:00:00	27.9477	-24.2921	0.299677	8289.57
SPGR	09/10/2021 01:00	9	10	Spring	2021-10-09	2	01:00:00	01:00:00	27.9761	-24.2753	0.005555	4220.14
SPGR	10/10/2021 01:00	10	10	Spring	2021-10-10	2	01:00:00	01:00:00	27.9752	-24.2942	0.006338	6526.21
SPGR	11/10/2021 01:00	11	10	Spring	2021-10-11	2	01:00:00	01:00:00	27.9418	-24.3161	0.018174	7470.42
SPGR	12/10/2021 01:00	12	10	Spring	2021-10-12	2	01:00:00	01:00:00	27.9672	-24.3291	0.001111	6531.23
SPGR	13/10/2021 01:00	13	10	Spring	2021-10-13	2	01:00:00	01:00:00	27.9336	-24.3348	0.023362	5127.31
SPGR	14/10/2021 01:00	14	10	Spring	2021-10-14	2	01:00:00	01:00:00	27.9492	-24.3365	0.009033	6790.27
SPGR	15/10/2021 01:00	15	10	Spring	2021-10-15	2	01:00:00	01:00:00	27.9762	-24.3326	1.20313	10666.1
SPGR	16/10/2021 01:00	16	10	Spring	2021-10-16	2	01:00:00	01:00:00	27.9419	-24.3247	0.338446	8516.39
SPGR	17/10/2021 01:00	17	10	Spring	2021-10-17	2	01:00:00	01:00:00	27.9416	-24.352	0.005554	6616.26
SPGR	18/10/2021 01:00	18	10	Spring	2021-10-18	2	01:00:00	01:00:00	27.9451	-24.3158	0	8652.34
SPGR	19/10/2021 01:00	19	10	Spring	2021-10-19	2	01:00:00	01:00:00	27.9449	-24.2856	0.010421	5438.88
SPGR	20/10/2021 01:00	20	10	Spring	2021-10-20	2	01:00:00	01:00:00	27.9634	-24.3058	0.006084	5108.49
SPGR	21/10/2021 01:00	21	10	Spring	2021-10-21	2	01:00:00	01:00:00	27.9422	-24.3195	0.006756	7568.4
SPGR	22/10/2021 01:00	22	10	Spring	2021-10-22	2	01:00:00	01:00:00	27.9465	-24.3167	0.183884	6035.78
SPGR	23/10/2021 01:00	23	10	Spring	2021-10-23	2	01:00:00	01:00:00	27.9452	-24.3157	0.005646	8049.18
SPGR	24/10/2021 01:00	24	10	Spring	2021-10-24	2	01:00:00	01:00:00	27.9943	-24.3435	0.199209	7324.77
SPGR	25/10/2021 01:00	25	10	Spring	2021-10-25	2	01:00:00	01:00:00	27.9788	-24.3553	0.00526	5876.77
SPGR	26/10/2021 01:00	26	10	Spring	2021-10-26	2	01:00:00	01:00:00	27.9596	-24.3482	0.168248	12224.4
SPGR	27/10/2021 01:00	27	10	Spring	2021-10-27	2	01:00:00	01:00:00	27.9698	-24.2888	0.228517	9626.84
SPGR	28/10/2021 01:00	28	10	Spring	2021-10-28	2	01:00:00	01:00:00	28.0099	-24.28	0.365545	9096.83
SPGR	29/10/2021 01:00	29	10	Spring	2021-10-29	2	01:00:00	01:00:00	28.0111	-24.2971	0.044915	9800.89
SPGR	30/10/2021 01:00	30	10	Spring	2021-10-30	2	01:00:00	01:00:00	27.9548	-24.2967	0.017668	8041.81
SPGR	31/10/2021 01:00	31	10	Spring	2021-10-31	2	01:00:00	01:00:00	27.9743	-24.3541	0.008037	13627.7
